# Supplementary material for: Impaired RelA signaling and lipid metabolism dysregulation in hepatocytes: driving forces in the progression of metabolic dysfunction-associated steatotic liver disease
Source: Springer Nature journal article supplement (doi:10.1038/s41420-025-02312-3), 2025-02-05

# **Impaired RelA Signaling in Hepatocytes promotes the Progression of Metabolic Dysfunction-associated Steatotic Liver Disease by Remodeling Lipid Metabolism**

**Running title:** Impaired RelA signaling promotes MASLD

Yihuai He<sup>1,2</sup>, Jinlian Jiang<sup>2</sup>, Lili Ou<sup>2</sup>, Yunfen Chen<sup>2</sup>, Aikedaimu Abudukeremu<sup>1</sup>, Guimei Chen<sup>2</sup>, Weiwei Zhong<sup>3</sup>, Zhigang Jiang<sup>4</sup>, Nuerbiye Nuermaimaiti<sup>1</sup>, Yaqun Guan<sup>1,5\*</sup>

<sup>1</sup>State Key Laboratory of Pathogenesis, Prevention and Treatment of High Incidence Diseases in Central Asia, Xinjiang Key Laboratory of Molecular Biology for Endemic Diseases, Department of Pathology, School of Basic Medical Sciences, Xinjiang Medical University, Urumqi 830000, Xinjiang, China

<sup>2</sup>Department of Infectious Diseases, Affiliated Hospital of Zunyi Medical University, Zunyi 563003, Guizhou, China

<sup>3</sup>Department of Infectious Diseases, Jingmen Central Hospital, Jingmen 448000, Hubei, China

<sup>4</sup>School of Public Health, Zunyi Medical University, Zunyi 563099, Guizhou, China

<sup>5</sup>Xinjiang Second Medical College, Karamay 834000, China

**\*Corresponding author:** Yaqun Guan

State Key Laboratory of Pathogenesis, Prevention and Treatment of High Incidence Diseases in Central Asia, Xinjiang Key Laboratory of Molecular Biology for Endemic Diseases, Department of Pathology, School of Basic Medical Sciences, Xinjiang

## Supplementary Figures

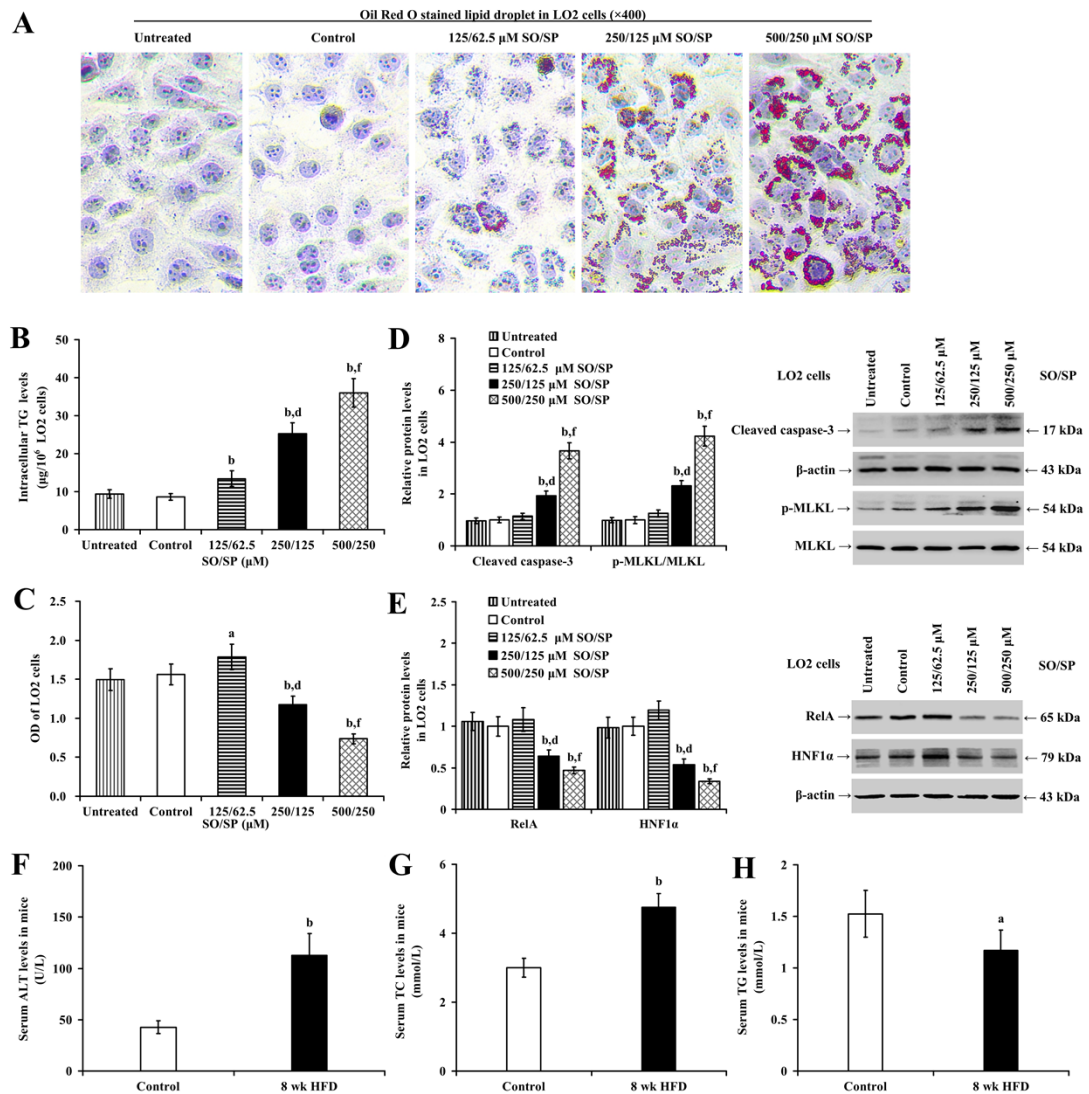

**Supplementary Fig. 1. Steatotic hepatocytes exhibit reduced levels of RelA and HNF1 $\alpha$  in MASLD.** (A–E) LO2 cells were treated with SO/SP, vehicle or left untreated at indicated concentrations to induce steatosis. Under this condition, (A) lipid droplet accumulation, (B) intracellular TG levels, (C) cell viability and the

expression of (D) cleaved caspase-3, p-MLKL, and (E) RelA and HNF1 $\alpha$  were evaluated. (F–H) Comparisons of serum (F) ALT, (G) TC, and (H) TG levels were evaluated and analyzed in mice (n=12) under indicated conditions. a  $P<0.05$ , b  $P<0.01$ , vs. control group; d  $P<0.01$ , vs. SO/SP group (125/62.5  $\mu$ M); f  $P<0.01$ , vs. SO/SP group (250/125  $\mu$ M). HFD: high-fat diet; SO/SP: sodium oleate and sodium palmitate;  $\mu$ M:  $\mu$ mol/L; wk: week.

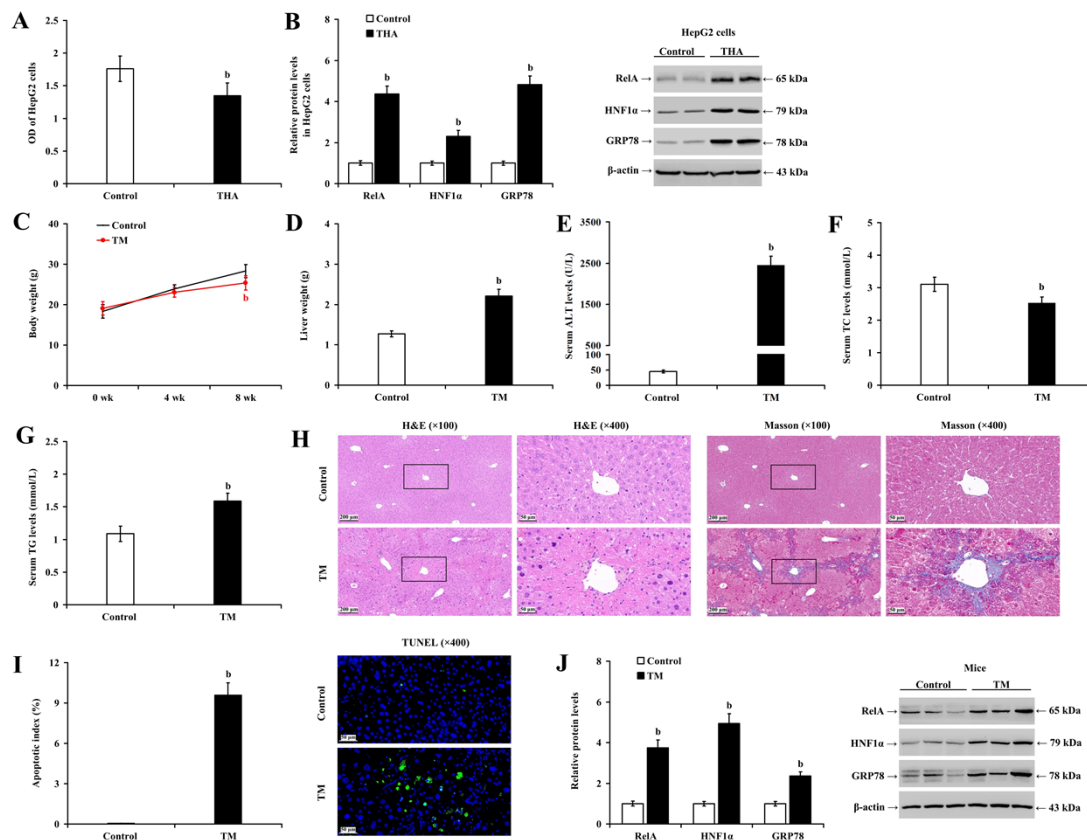

**Supplementary Fig. 2. Hepatocytes without steatosis exhibit elevated RelA and HNF1 $\alpha$  expression under ER stress.** (A and B) ER stress was induced in HepG2 cells using THA (or vehicle), and (A) cell viability and (B) the expression of RelA, HNF1 $\alpha$ , and GRP78 were evaluated. (C–K) Mice (n=12) were treated with TM or vehicle (DMSO) for 8 weeks. Under this condition, their (C) body weights, (D) liver

weights, serum levels of (E) ALT, (F) TC, and (G) TG were determined and compared. (H) Representative images of H&E (left panels), and Masson staining (right panels) of mouse livers. (I) Hepatic apoptotic index (calculated from the results of TUNEL staining). (J) Analyzed data (left panel) and representative images (right panel) of Western blot analysis showing the expression of RelA, HNF1 $\alpha$ , and GRP78 in mouse livers under different conditions. b  $P < 0.01$ , vs. control group. THA: thapsigargin; TM: tunicamycin; wk: week.

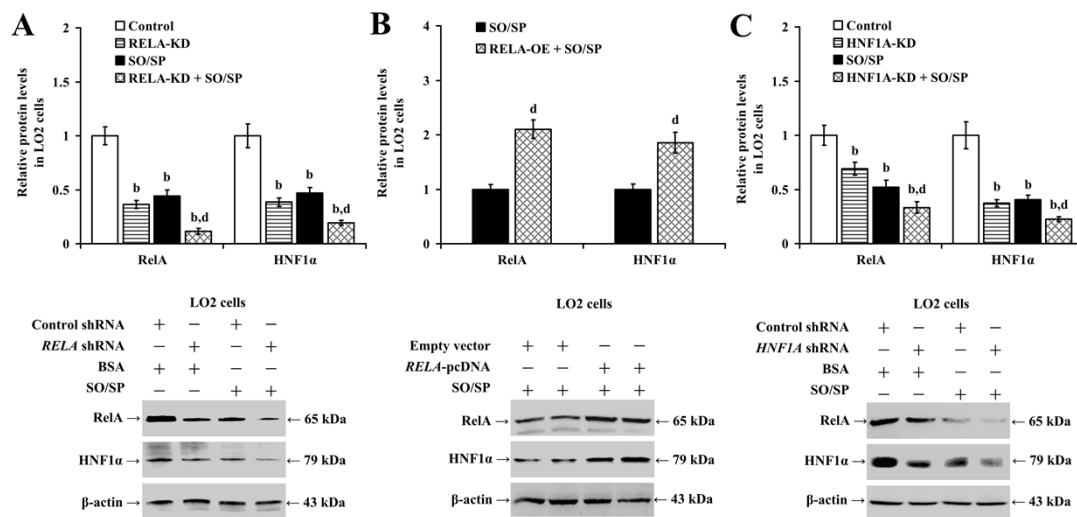

**Supplementary Fig. 3. Lack of mutual transcriptional activation between RelA and HNF1 $\alpha$  during hepatocyte steatosis.** (A–C) Quantified results (upper panels) and representative images (lower panels) of western blot analysis showing the expression of RelA and HNF1 $\alpha$  in LO2 cells under indicated conditions. b  $P < 0.01$ , vs. control group; d  $P < 0.01$ , vs. SO/SP group. BSA: bovine serum albumin; KD: knockdown; OE: overexpression; SO/SP: sodium oleate and sodium palmitate.

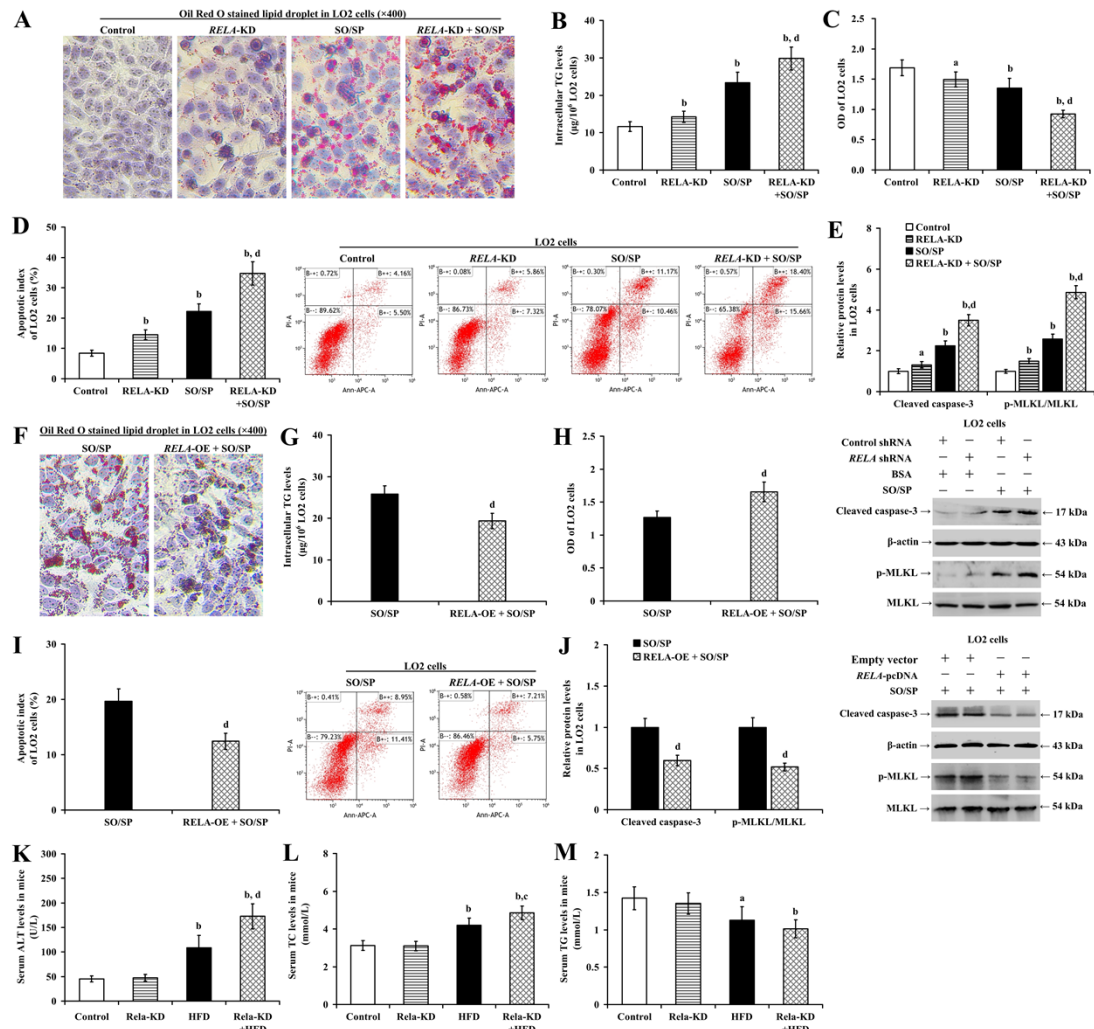

**Supplementary Fig. 4. RelA mitigates hepatocyte steatosis.** (A–E) LO2 cells with or without *RELA*-KD were treated with or without SO/SP. Under this condition, (A) lipid droplet accumulation, (B) intracellular TG levels, (C) cell viability, (D) cell apoptosis, and (E) the expression of cleaved caspase-3 and p-MLKL were determined and compared. (F–J) LO2 cells with or without *RELA*-OE were treated with SO/SP, and (F) lipid droplet accumulation, (G) intracellular TG levels, (H) cell viability, (I) cell apoptosis, and (J) the expression of cleaved caspase-3 and p-MLKL were determined and analyzed. (K–M) Analyzed data presenting the serum levels of (K) ALT, (L) TC, and (M) TG in mice with or without *RELA*-KD fed a normal diet or

HFD. a  $P<0.05$ , b  $P<0.01$ , vs. control group; c  $P<0.05$ , d  $P<0.01$ , vs. SO/SP group or HFD group. HFD: high-fat diet; KD: knockdown; OE: overexpression; SO/SP: sodium oleate and sodium palmitate.

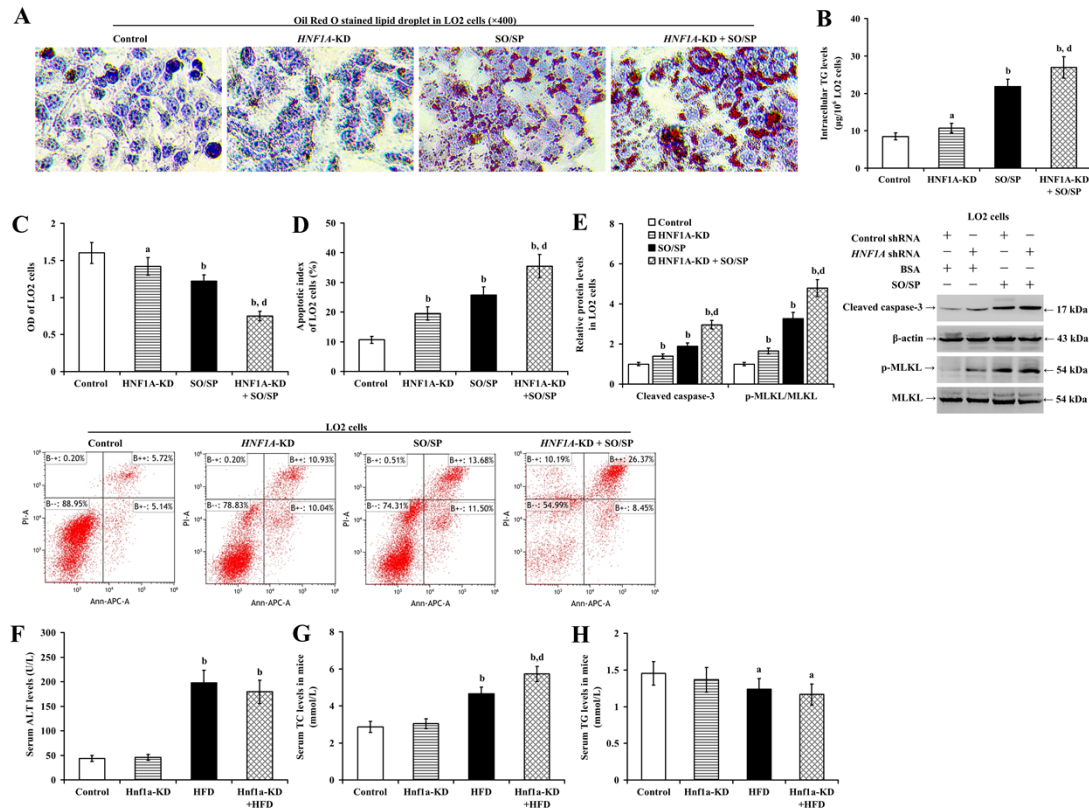

**Supplementary Fig. 5. *HNF1A* knockdown exacerbates hepatocyte steatosis.**

(A–E) LO2 cells with or without *HNF1A*-KD were treated with SO/SP. Under this condition, (A) intracellular lipid droplet accumulation, (B) TG content, (C) cell viability, (D) cell apoptosis, and (E) the expression of cleaved caspase-3 and p-MLKL were determined and compared. (F–H) Mice (n=12) with or without *Hnf1a* KD were fed with normal diet or HFD. Their serum levels of (F) ALT, (G) TC, and (H) TG were evaluated and analyzed. a  $P<0.05$ , b  $P<0.01$ , vs. control group; d  $P<0.01$ , vs. SO/SP group or HFD group. BSA: albumin; KD: knockdown; HFD: high-fat diet; KD:

knockdown; SO/SP: sodium oleate and sodium palmitate.

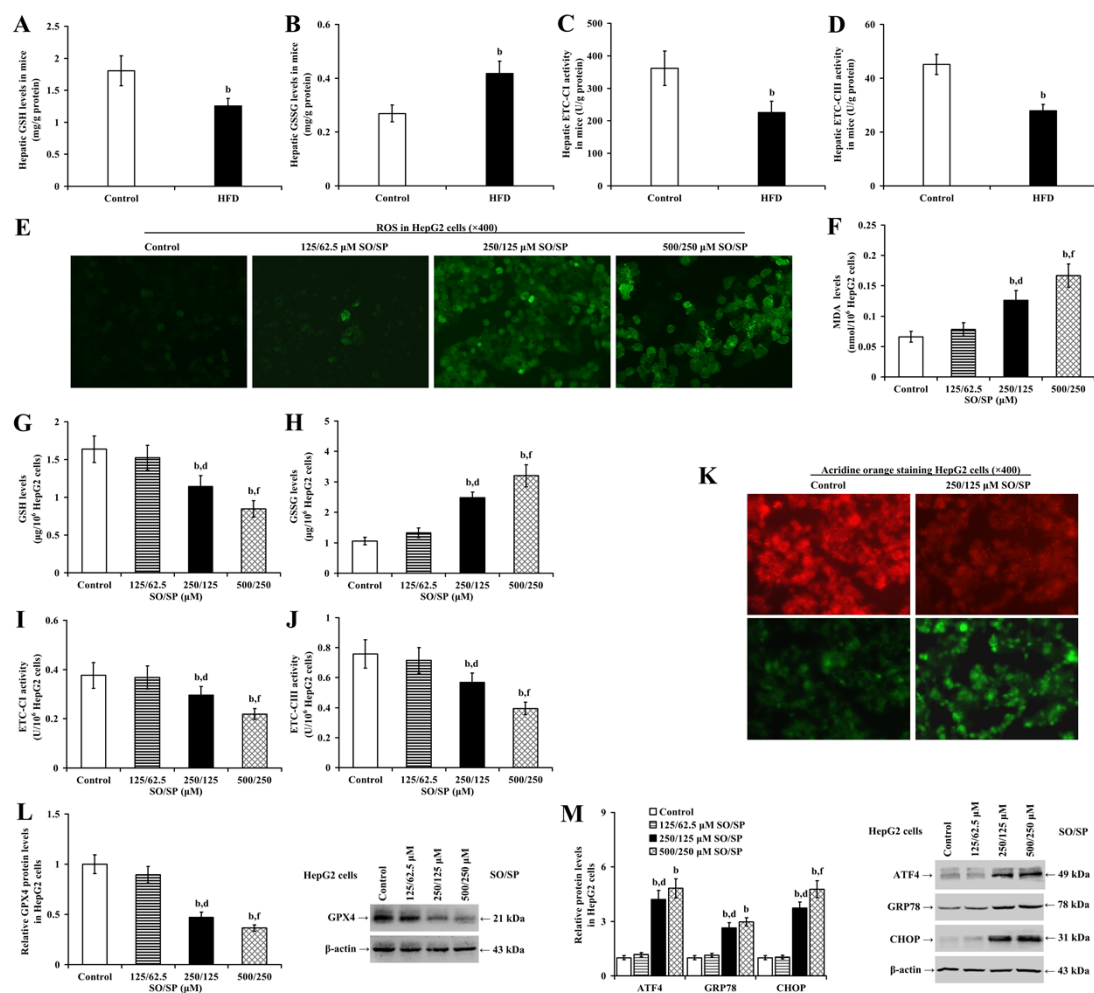

**Supplementary Fig. 6. Lipid accumulation in hepatocytes exhibits lipotoxic features, potentially triggering apoptosis and necroptosis.** (A–D) Analyzed data detailing the changes in (A) GSH levels, (B) GSSG levels, (C) ETC-CI activity, and (D) ETC-CIII activity in the livers of mice fed a normal diet or HFD. (E–M) HepG2 cells were treated with SO/SP at the indicated concentrations. Under this condition, (E) ROS levels, (F) MDA levels, (G) GSH levels, (H) GSSG levels, (I) ETC-CI activity, (J) ETC-CIII activity, and (K) changes in LMP (the reduction in red fluorescence and the increase in green fluorescence signify the strengthening of LMP) were determined

in the cells. (L and M) Quantified results and representative images of western blotting demonstrating the expression of (L) GPX4, (M) ATF4, GRP78, and CHOP in HepG2 cells under indicated conditions. b  $P<0.01$ , vs. control group; d  $P<0.01$ , vs. SO/SP group (125/62.5  $\mu\text{M}$ ); f  $P<0.01$ , vs. SO/SP group (250/125  $\mu\text{M}$ ). HFD: high-fat diet; LMP: lysosomal membrane permeabilization; SO/SP: sodium oleate and sodium palmitate;  $\mu\text{M}$ :  $\mu\text{mol/L}$ .

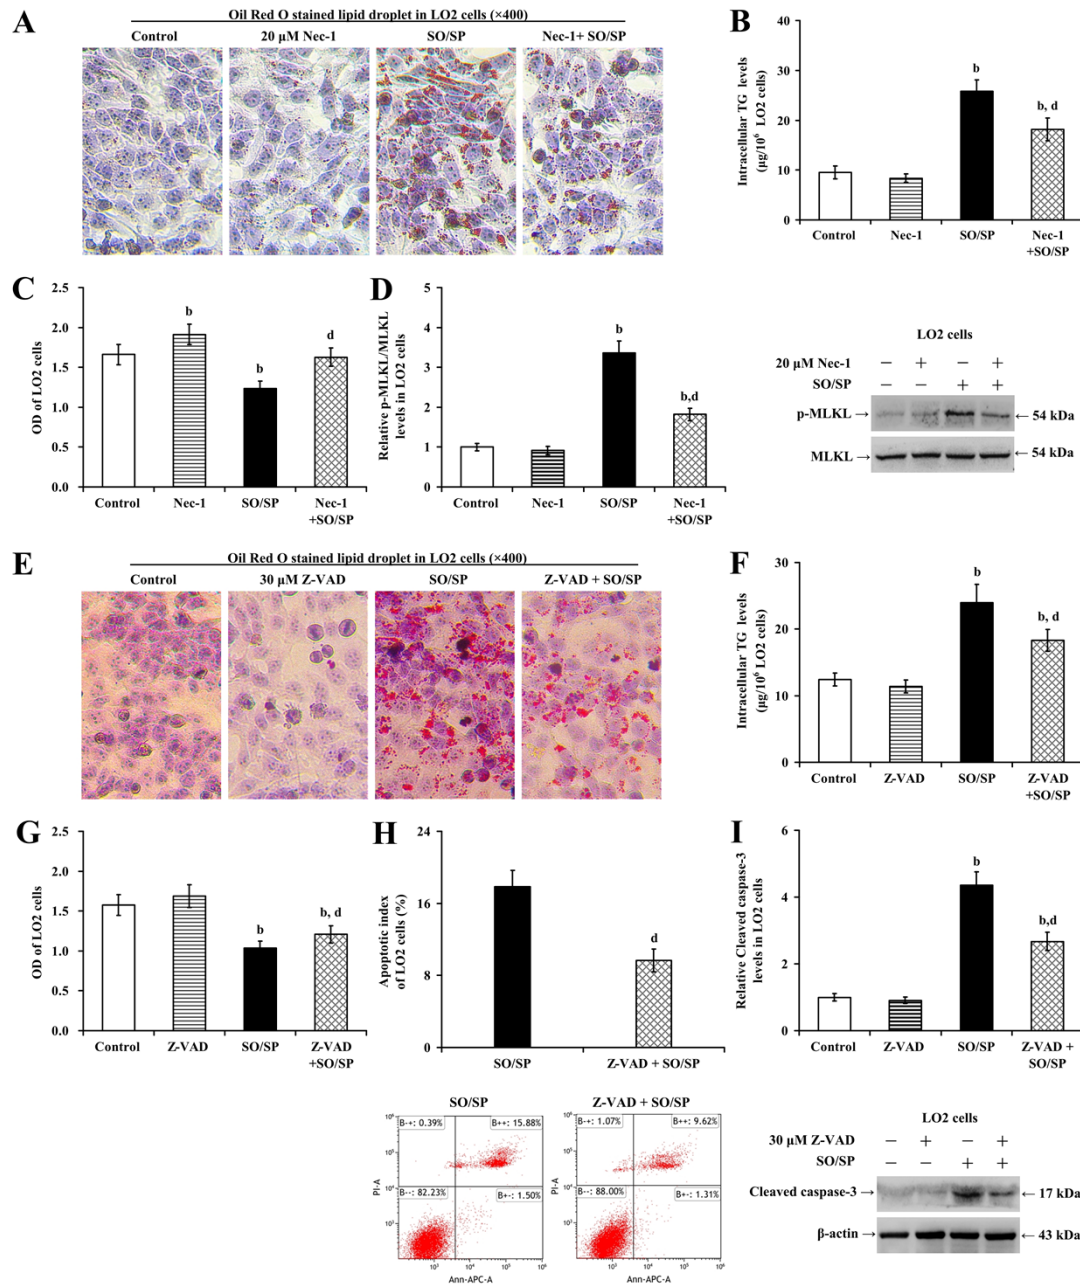

**Supplementary Fig. 7. Necrostatin-1 and Z-VAD alleviate SO/SP-induced hepatocyte injury.** (A–D) LO2 cells were treated with or without SO/SP in the presence or absence of Nec-1 (20 μM). Under this condition, (A) lipid droplet accumulation, (B) intracellular TG levels, (C) cell viability, and (D) p-MLKL expression were determined. (E–I) LO2 cells were treated with or without SO/SP in the presence or absence of Z-VAD (30 μM). Under this condition, (E) lipid droplet

accumulation, (F) intracellular TG levels, (G) cell viability, (H) cell apoptosis, and (I) cleaved caspase-3 expression were determined. b  $P < 0.01$ , vs. control group; d  $P < 0.01$ , vs. SO/SP group. Nec-1: necrostatin-1; SO/SP: sodium oleate and sodium palmitate;  $\mu\text{M}$ :  $\mu\text{mol/L}$ .

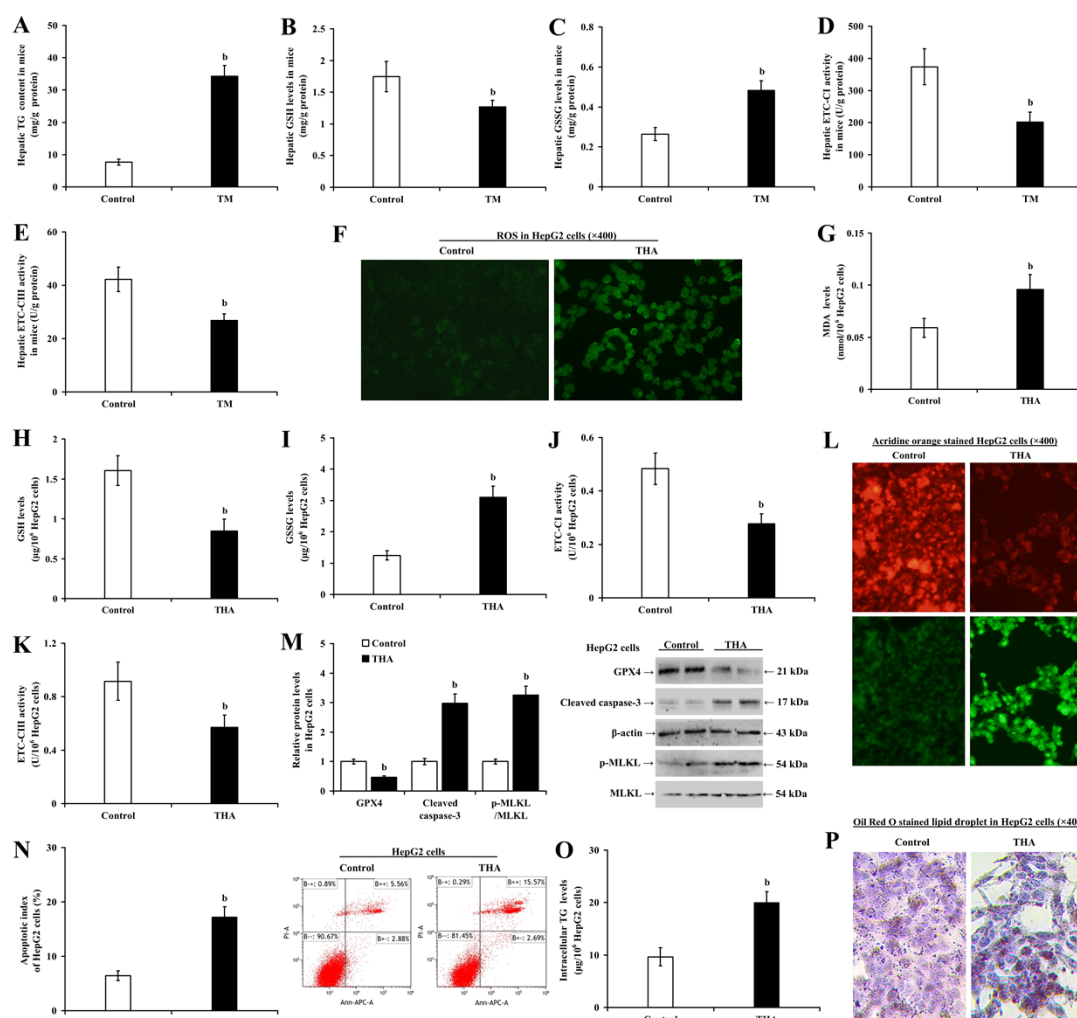

**Supplementary Fig. 8. ER stress-initiated hepatotoxicity mirrors the processes involved in hepatocyte steatosis.** (A–E) The mice were treated with or without TM, and the changes in (A) hepatic TG content, (B) GSH levels, (C) GSSG levels, (D) ETC-CI activity, and (E) ETC-CIII activity were measured. (F–P) In THA-treated

HepG2 cells, the changes in (F) ROS levels (green fluorescence intensity), (G) MDA levels, (H) GSH levels, (I) GSSG levels, (J) ETC-CI activity, (K) ETC-CIII activity, (L) LMP were evaluated. The expression of (M) GPX4, cleaved caspase-3, and p-MLKL, (N) cell apoptosis, (O) intracellular TG levels, and (P) lipid droplet accumulation were also determined in HepG2 cells treated with or without THA.  $b$   $P < 0.01$ , vs. control group. LMP: lysosomal membrane permeabilization; THA: thapsigargin; TM: tunicamycin.

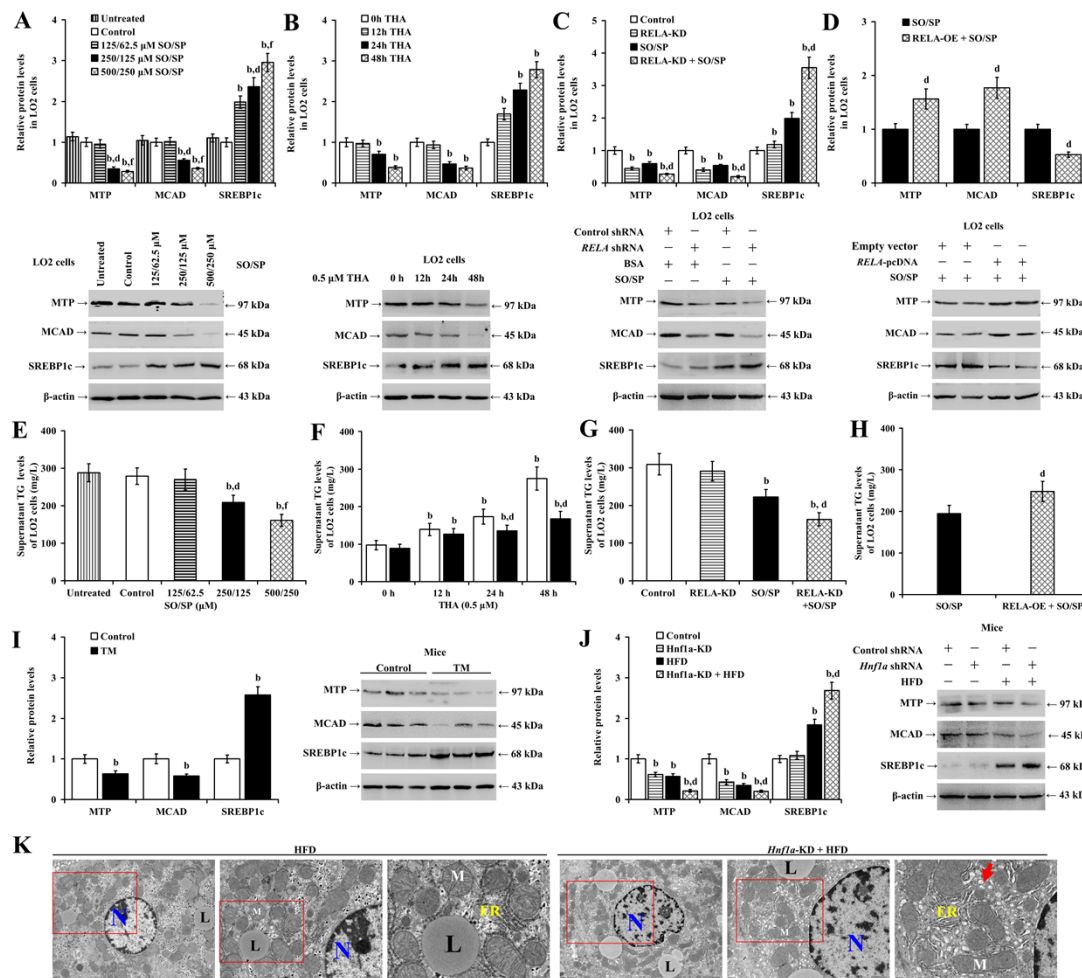

**Supplementary Fig. 9. Impaired RelA signaling reprograms lipid metabolism promotes lipid accumulation in hepatocytes with steatosis. (A–D)** The expression

of lipid metabolism-related proteins (MTP, MCAD, SREBP1c) in LO2 cells under the conditions of (A) SO/SP treatment, (B) THA treatment (0.5  $\mu$ M), and SO/SP treatment with or without (C) *RELA*-KO or (D) *RELA*-OE. (E-H) Extracellular TG levels were measured under the conditions of (E) SO/SP treatment, (F) THA treatment, and SO/SP treatment with or without (G) *RELA*-KO or (H) *RELA*-OE. (I) Analyzed data and representative images of Western blot analysis showing the expression of lipid metabolism-related proteins in the livers from mice induced with or without TM. (J) Analyzed data and representative images of Western blot analysis showing the expression of lipid metabolism-related proteins in the livers from mice with or without *Hnfla*-KD under normal diet or HFD. (K) Representative TEM images showing the ultrastructure of mouse liver under *Hnfla*-KD. Red rectangles indicate magnified area. b  $P<0.01$ , vs. control group or 0 h group; d  $P<0.01$ , vs. SO/SP group (125/62.5  $\mu$ M), the corresponding SO/SP group, or HFD group; f  $P<0.01$ , vs. SO/SP group (250/125  $\mu$ M). BSA: bovine serum albumin; HFD: high-fat diet; KD: knockdown; OE: overexpression; SO/SP: sodium oleate and sodium palmitate; THA: thapsigargin; TM: tunicamycin;  $\mu$ M:  $\mu$ mol/L.

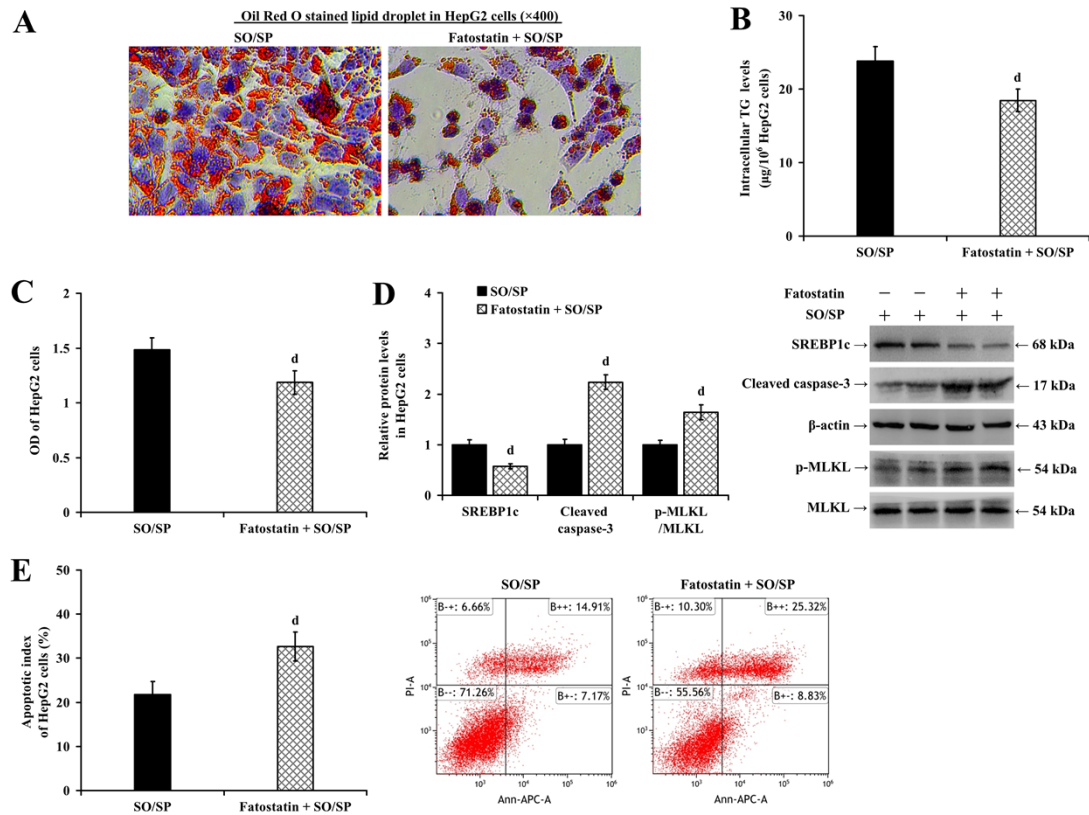

**Supplementary Fig. 10. Fatostatin reduces SO/SP-induced lipid accumulation and exacerbates cell injury in HepG2 cells.** (A–E) HepG2 cells were treated with SO/SP in the presence or absence of fatostatin (20 μM). Under this condition, (A) lipid droplet accumulation, (B) intracellular TG levels, (C) cell viability, (D) the expression of SREBP1c, cleaved caspase-3, and p-MLKL, and (E) cell apoptosis were evaluated. <sup>d</sup>  $P < 0.01$ , vs. SO/SP group. SO/SP: sodium oleate and sodium palmitate; μM: μmol/L.

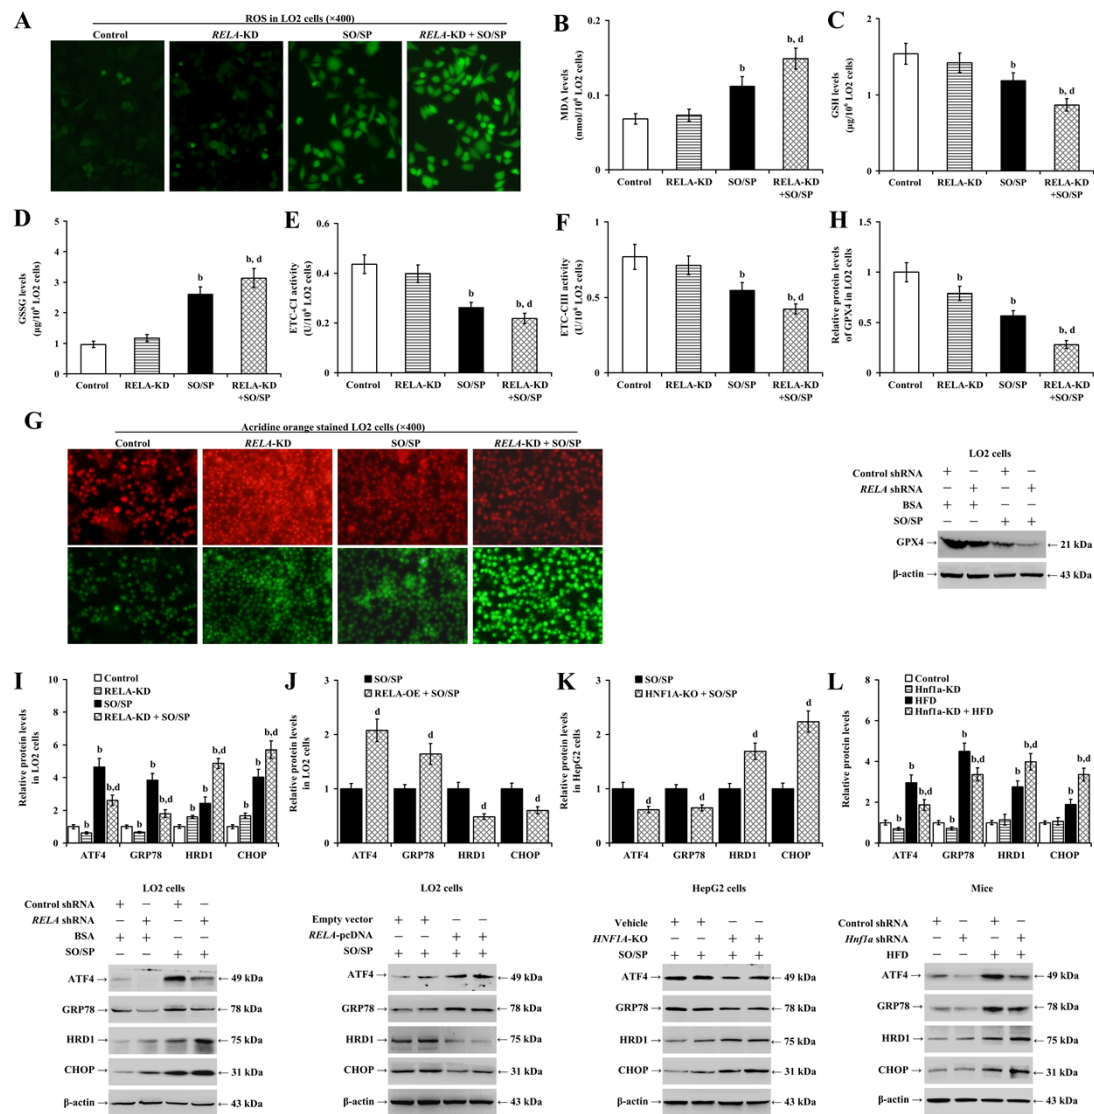

**Supplementary Fig. 11. Impaired RelA signaling remodels the ER stress response and exacerbates lipotoxicity during hepatocyte steatosis.** (A–H) LO2 cells with or without *RELA*-KD were treated with or without SO/SP. Under this condition, (A) ROS levels, (B) MDA levels, (C) GSH levels, (D) GSSG levels, (E) ETC-CI activity, (F) ETC-CIII activity, (G) LMP status, and (H) GPX4 expression were evaluated. (I–K) Analyzed data and representative images of western blot analysis showing the expression of ER stress-related proteins in LO2 cells treated with vehicle or SO/SP with or without (I) *RELA*-KD or (J) *RELA*-OE. (K)

Representative western blot images presenting the expression of ER stress-related proteins in HepG2 cells under the indicated conditions. (L) Analyzed data and representative images of Western blot analysis showing the expression of ER stress-related proteins in normal diet or HFD-fed mice with or without *Hnfla*-KD. b  $P<0.01$ , vs. control group; d  $P<0.01$ , vs. SO/SP group or HFD group. BSA: bovine serum albumin; HFD: high-fat diet; SO/SP: sodium oleate and sodium palmitate.

**Fig. 1D**

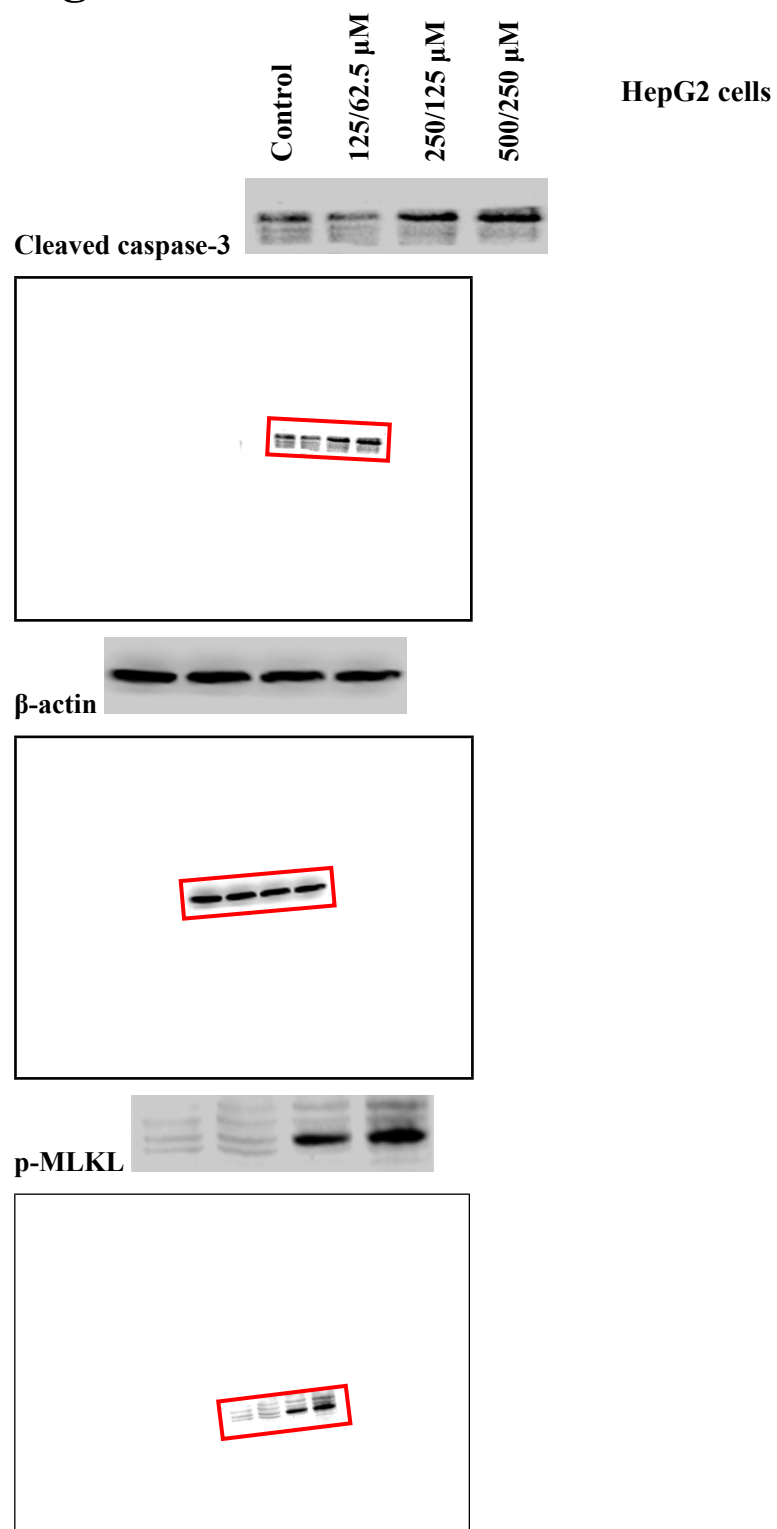

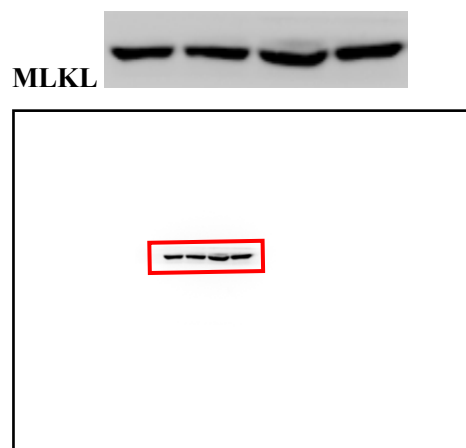

**Fig. 1E**

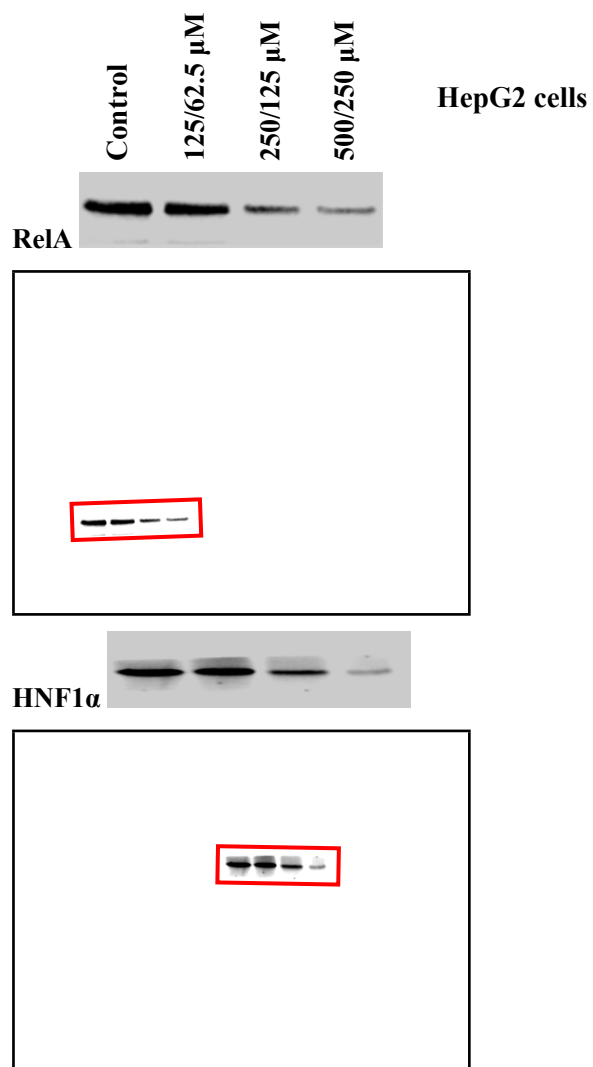

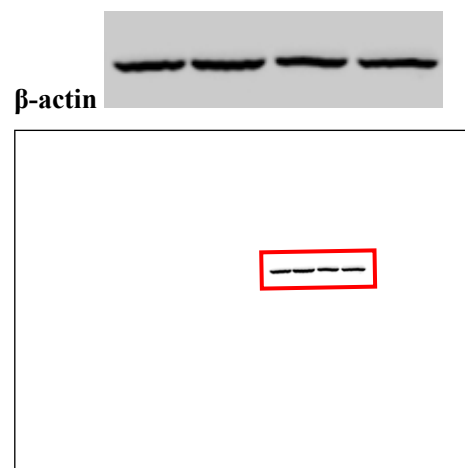

**Fig. 1K**

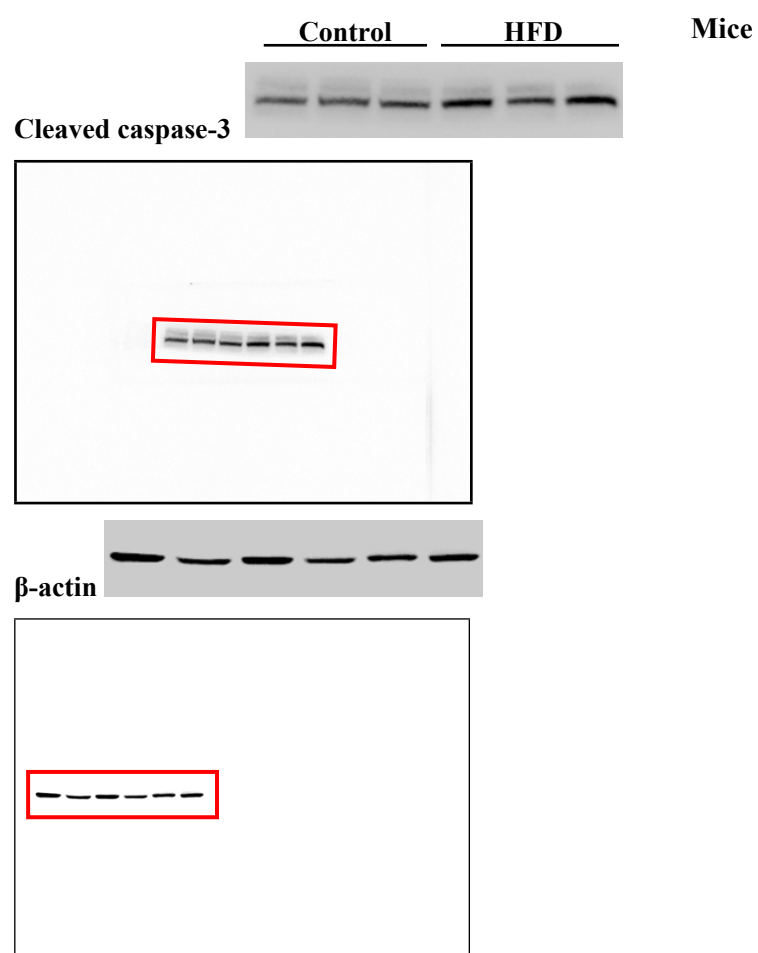

p-MLKL

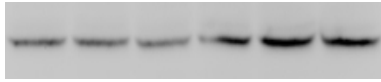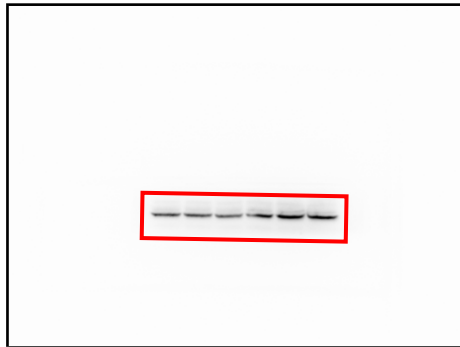

MLKL

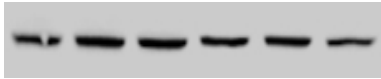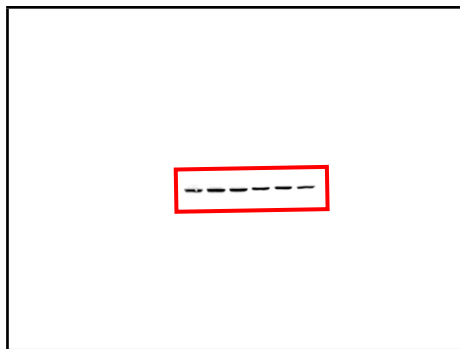

**Fig 1L**

Control HFD Mice

RelA

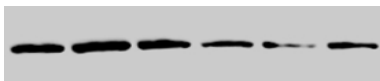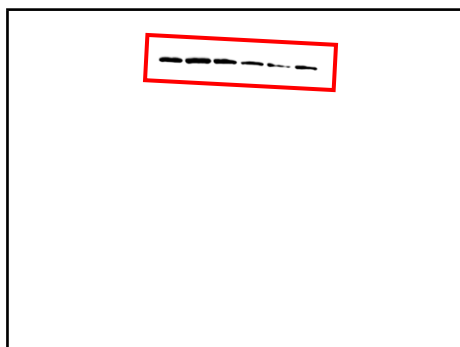

**HNF1 $\alpha$**

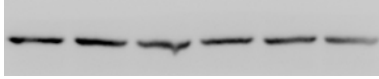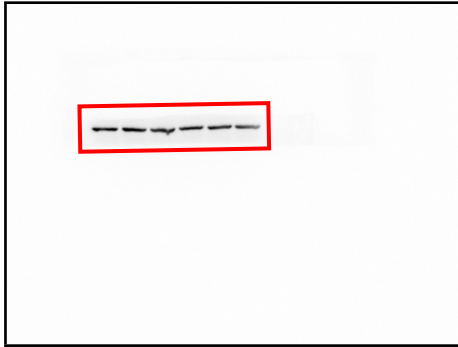

**$\beta$ -actin**

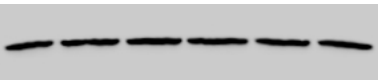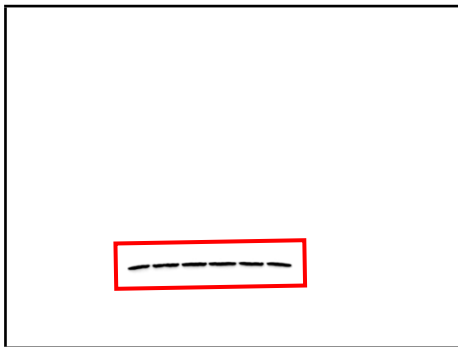

Fig. 2A

|         |   |   |   |   |
|---------|---|---|---|---|
| Vehicle | + | + | - | - |
| RELA-KO | - | - | + | + |
| SO/SP   | + | + | + | + |

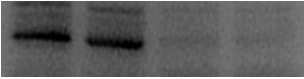

RelA

HepG2 cells

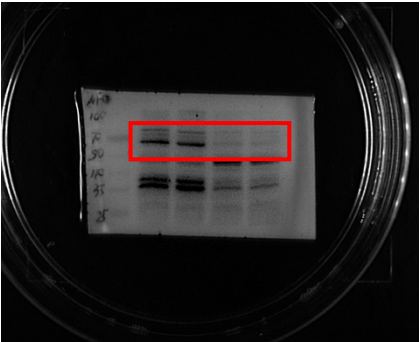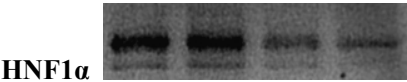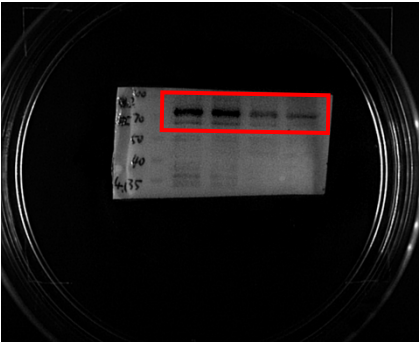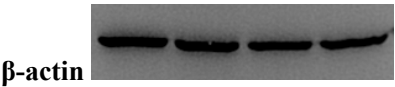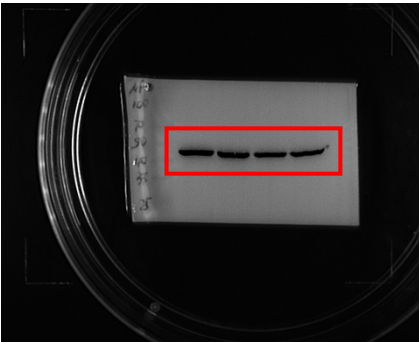

**Fig. 2B**

|                    |   |   |   |   |             |
|--------------------|---|---|---|---|-------------|
| Empty vector       | + | + | - | - | HepG2 cells |
| <i>RELA</i> -pcDNA | - | - | + | + |             |
| SO/SP              | + | + | + | + |             |

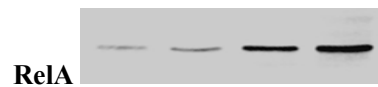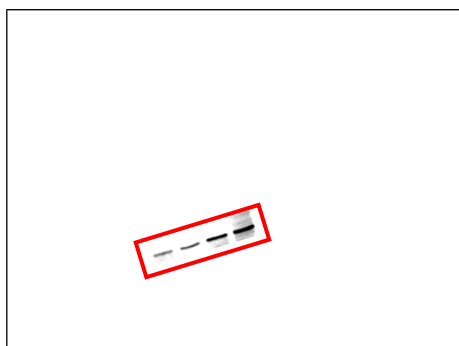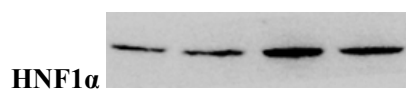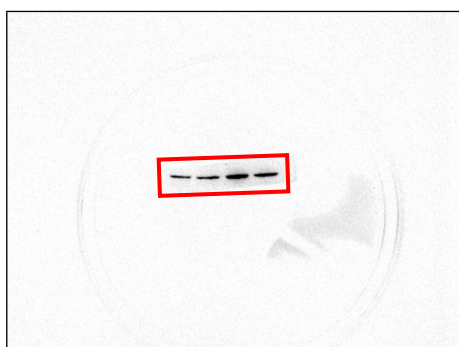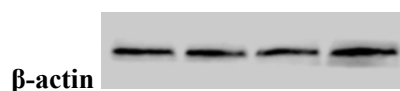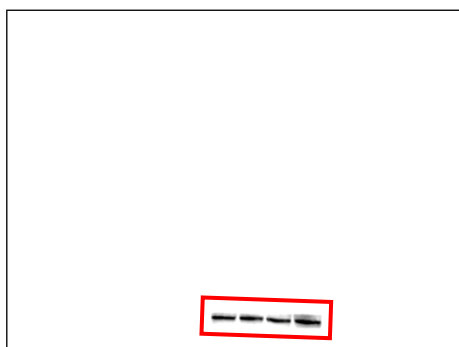

**Fig. 2C**

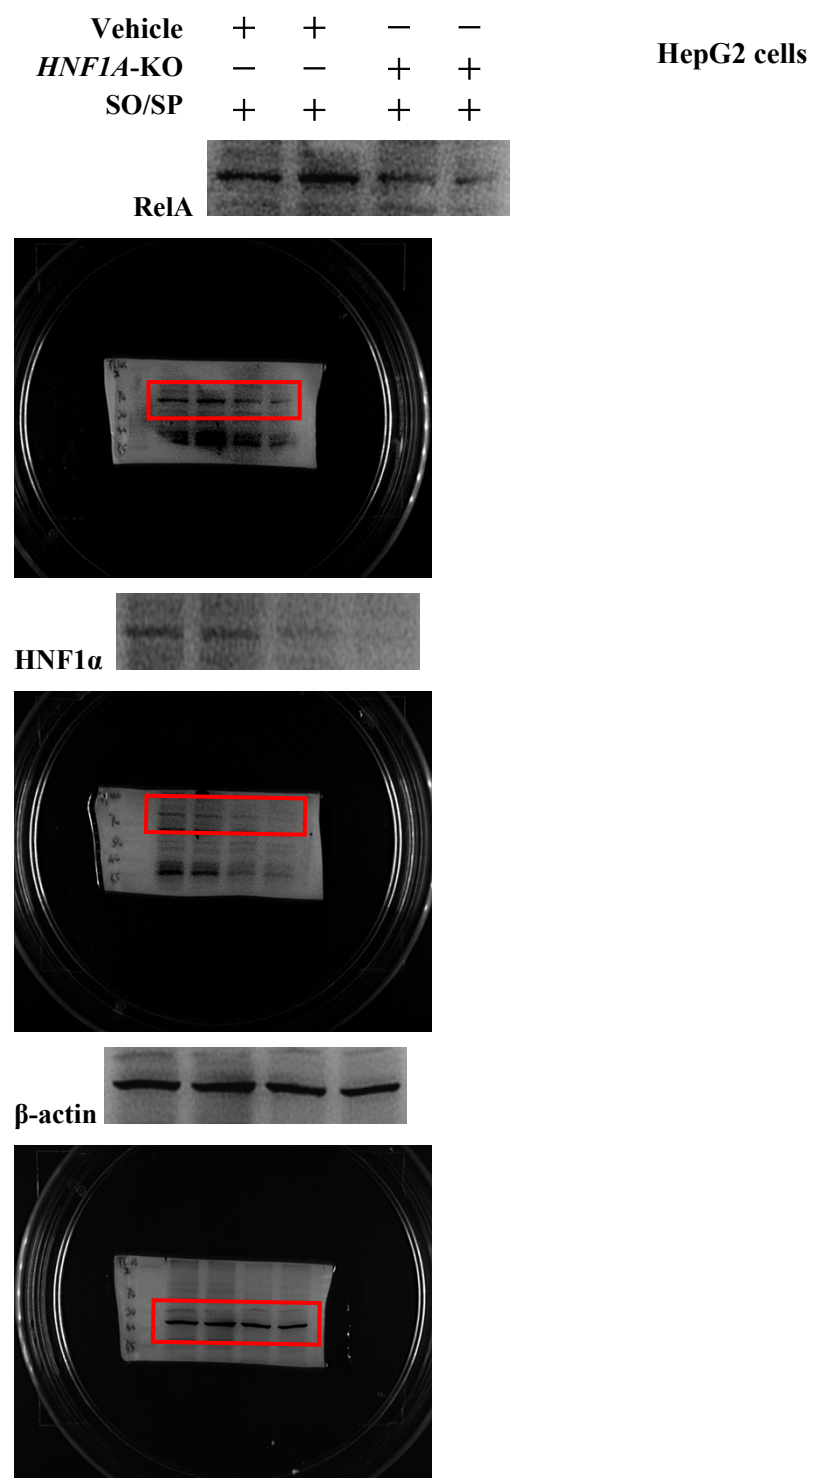

**Fig. 2F**

|                   |   |   |   |   |      |
|-------------------|---|---|---|---|------|
| Control shRNA     | + | - | + | - | Mice |
| <i>Rela</i> shRNA | - | + | - | + |      |
| HFD               | - | - | + | + |      |

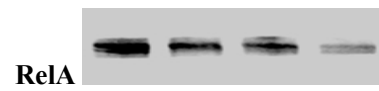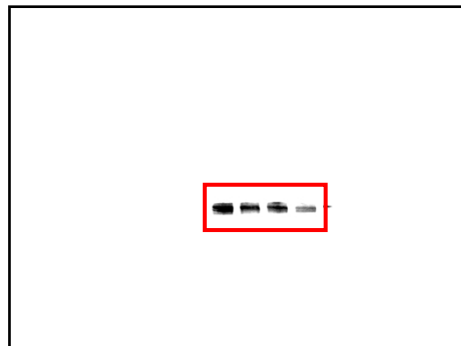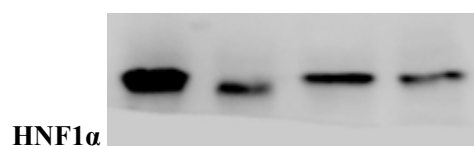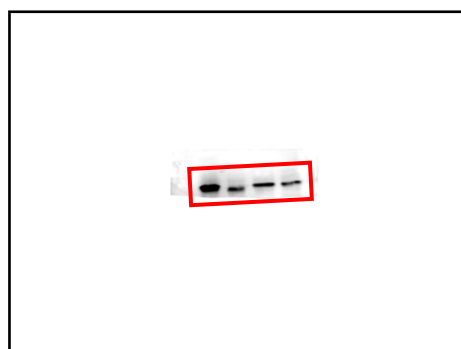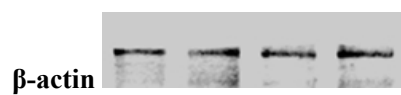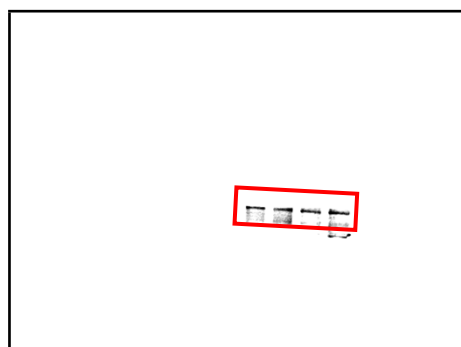

**Fig. 2G**

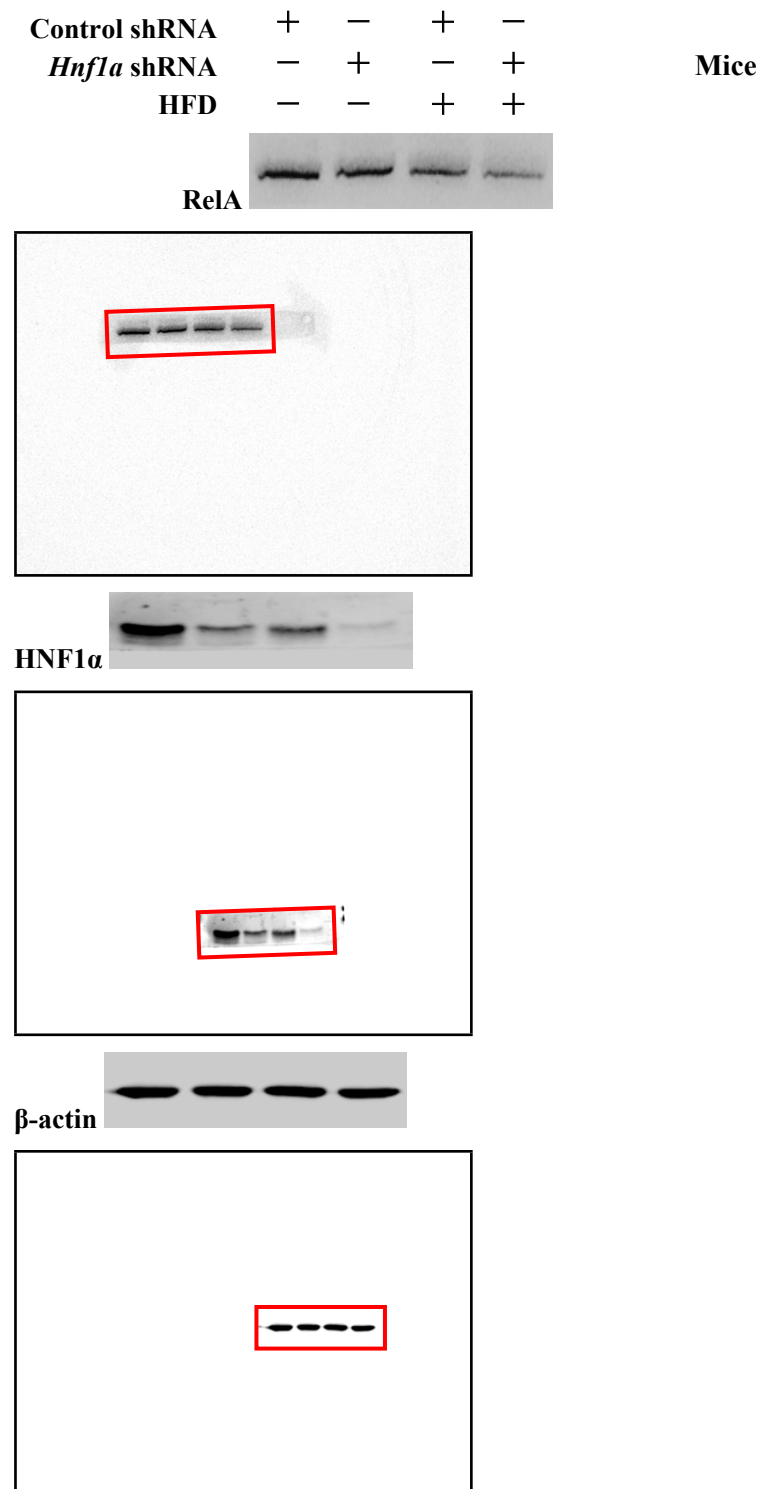

**Fig. 3E**

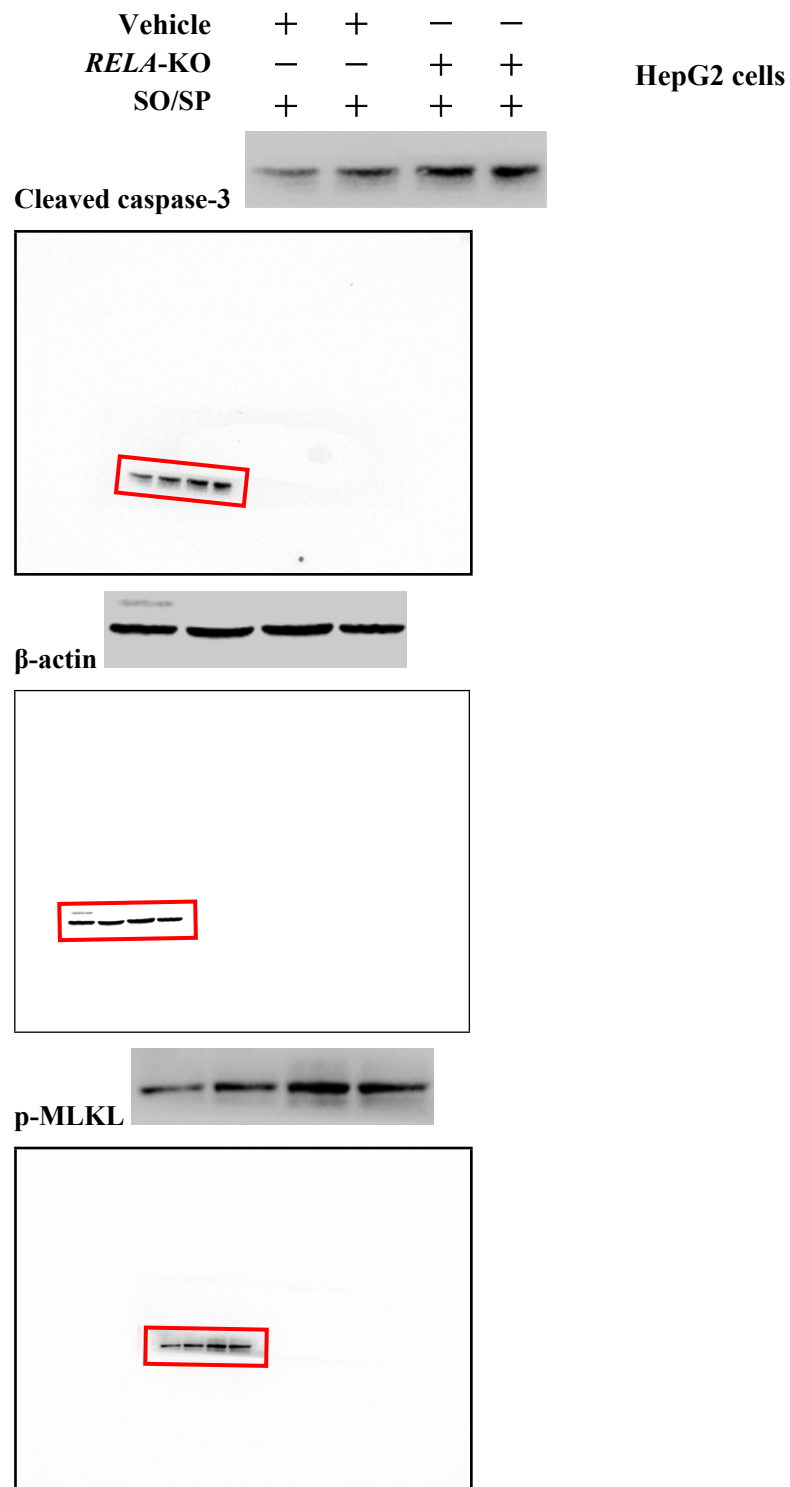

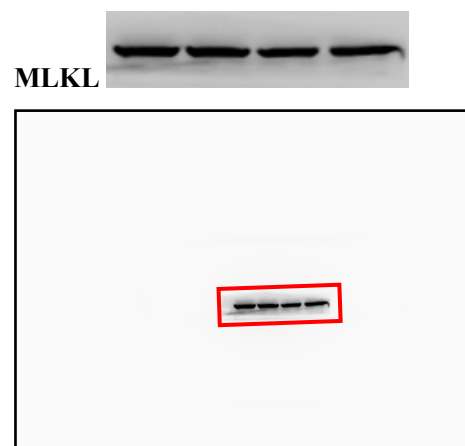

**Fig. 3J**

|                    |   |   |   |   |             |
|--------------------|---|---|---|---|-------------|
| Empty vector       | + | + | - | - | HepG2 cells |
| <i>RELA</i> -pcDNA | - | - | + | + |             |
| SO/SP              | + | + | + | + |             |

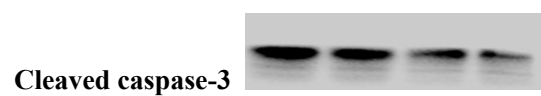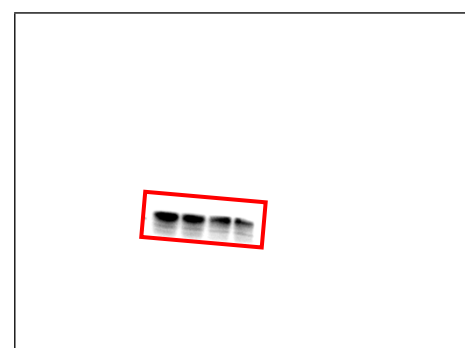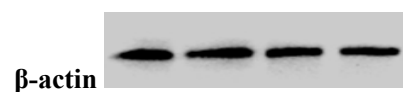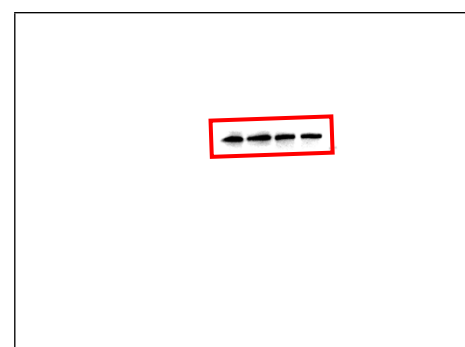

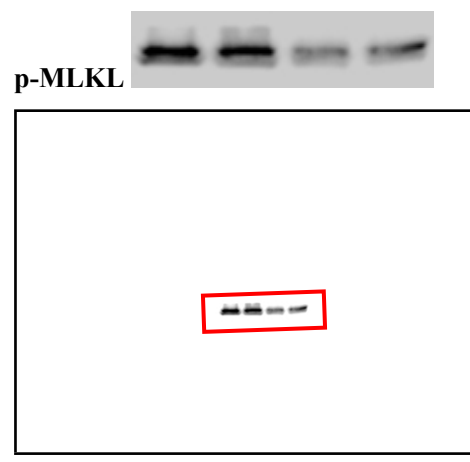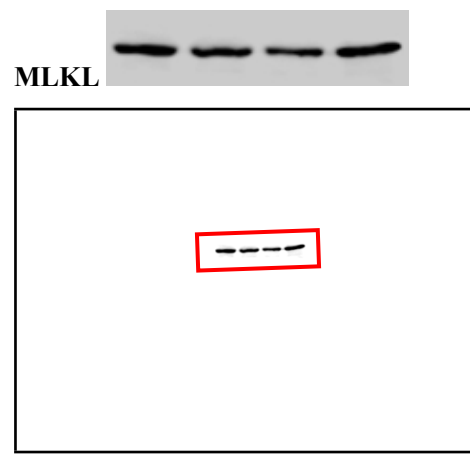

**Fig. 4F**

|                   |   |   |   |   |      |
|-------------------|---|---|---|---|------|
| Control shRNA     | + | − | + | − | Mice |
| <i>Rela</i> shRNA | − | + | − | + |      |
| HFD               | − | − | + | + |      |

Cleaved caspase-3

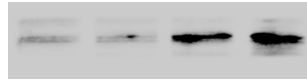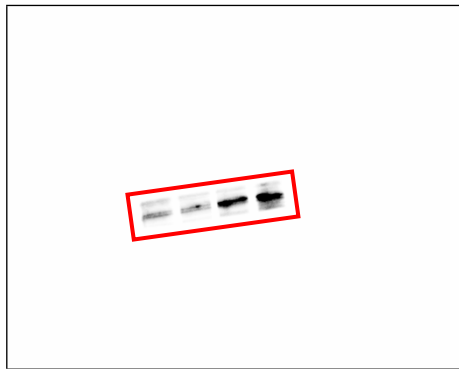

$\beta$ -actin

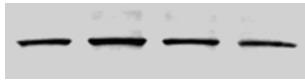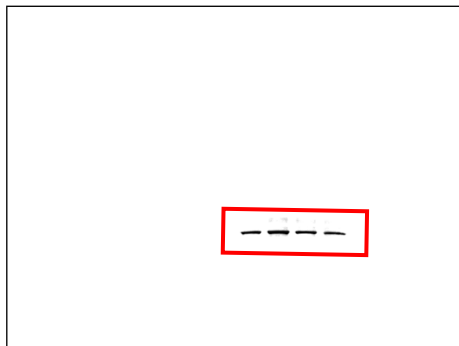

p-MLKL

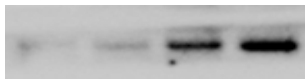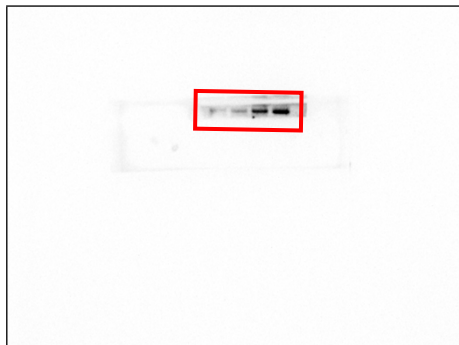

**MLKL**

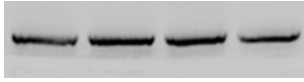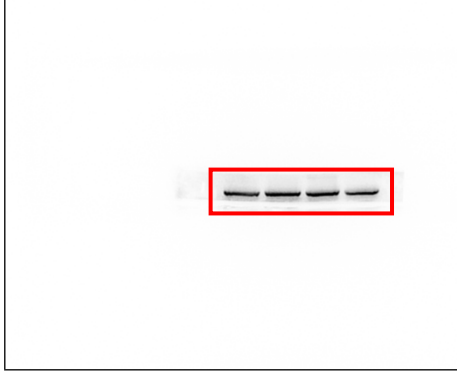

**Fig. 5E**

|                       |   |   |   |   |             |
|-----------------------|---|---|---|---|-------------|
| Vehicle               | + | + | - | - | HepG2 cells |
| <i>HNFL1A</i> -KO     | - | - | + | + |             |
| 250/125 $\mu$ M SO/SP | + | + | + | + |             |

Cleaved caspase-3

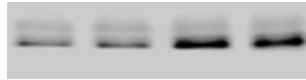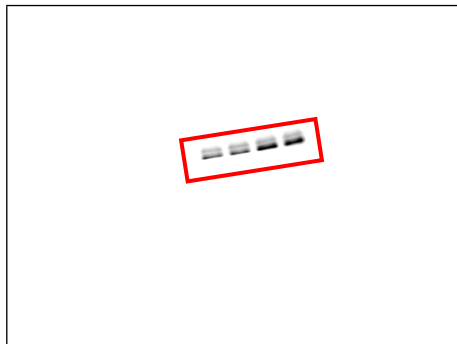

$\beta$ -actin

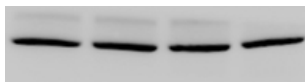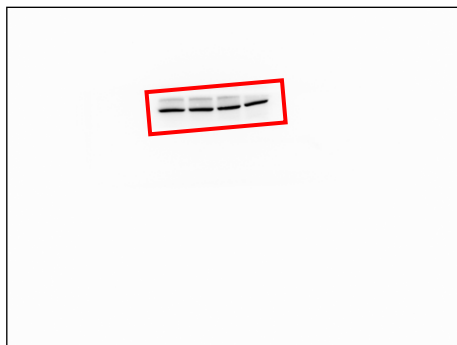

p-MLKL

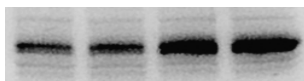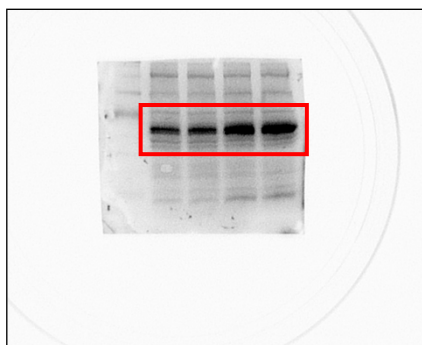

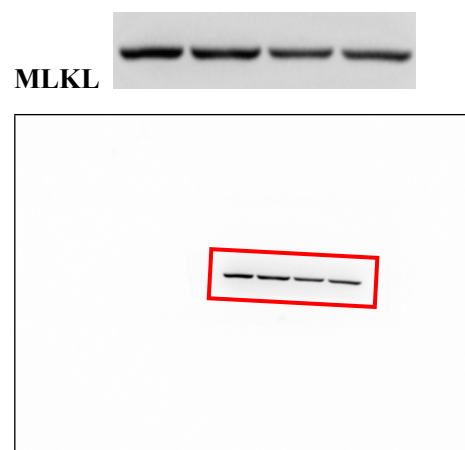

**Fig. 5K**

|                    |   |   |   |   |      |
|--------------------|---|---|---|---|------|
| Control shRNA      | + | — | + | — | Mice |
| <i>Hnfla</i> shRNA | — | + | — | + |      |
| HFD                | — | — | + | + |      |

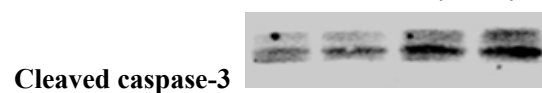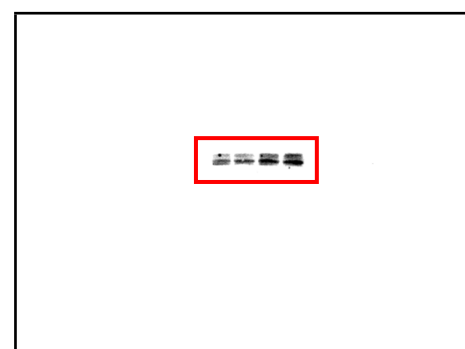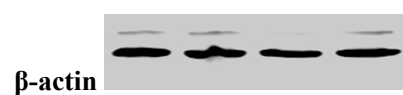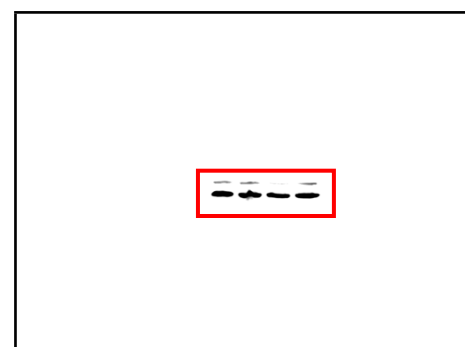

p-MLKL

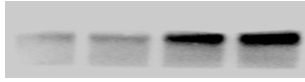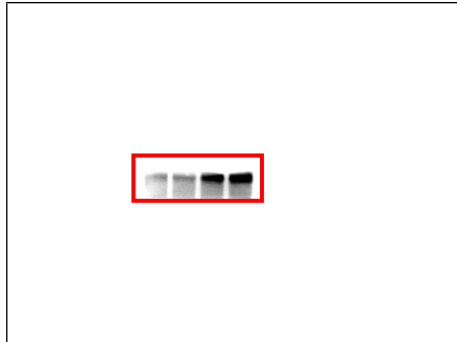

MLKL

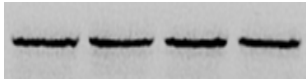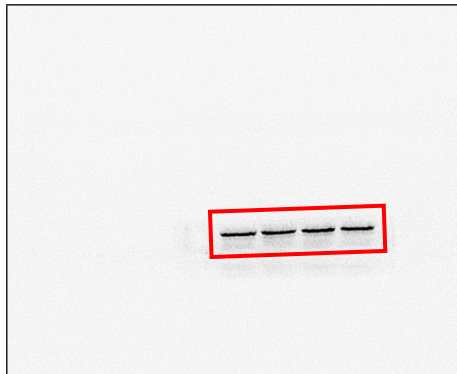

**Fig. 6G**

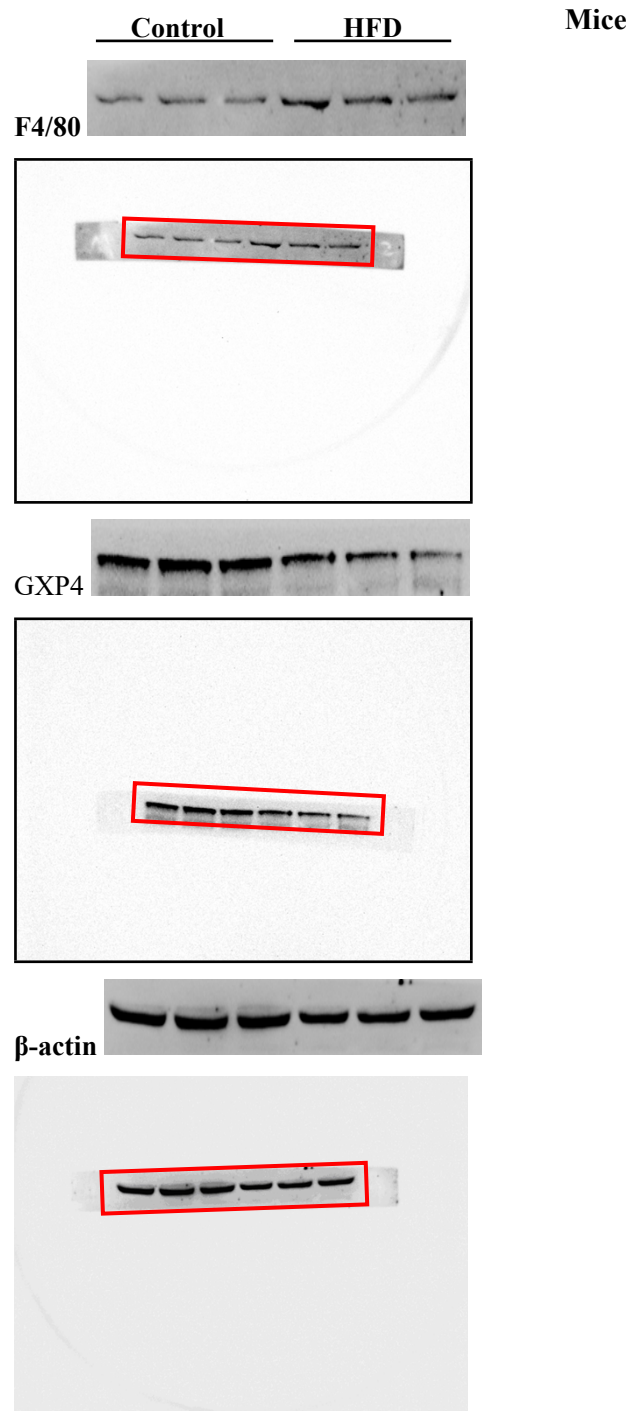

**Fig. 6H**

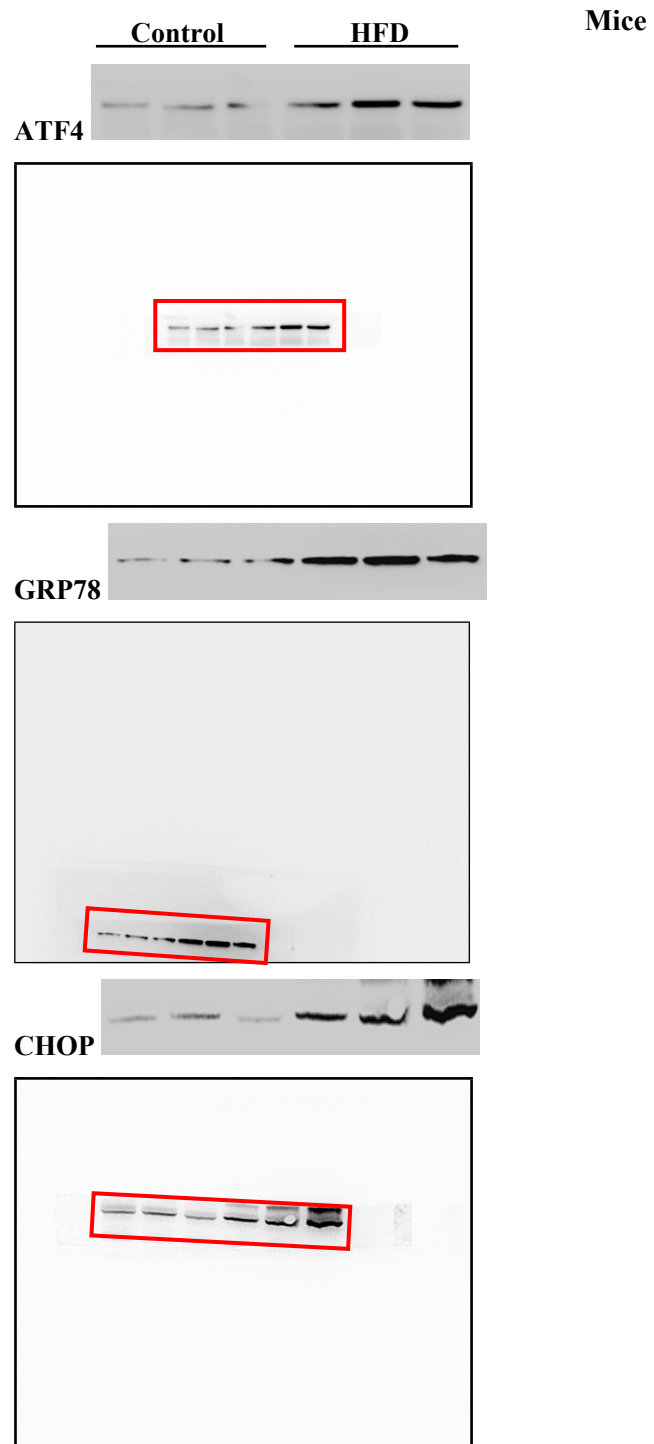

$\beta$ -actin

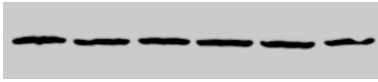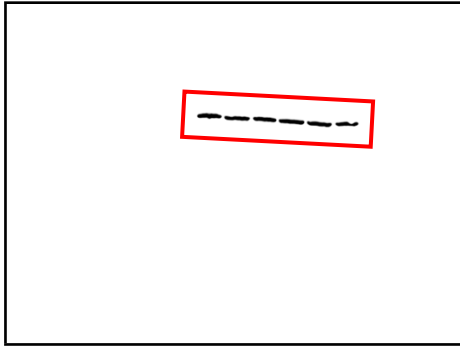

**Fig. 7D**

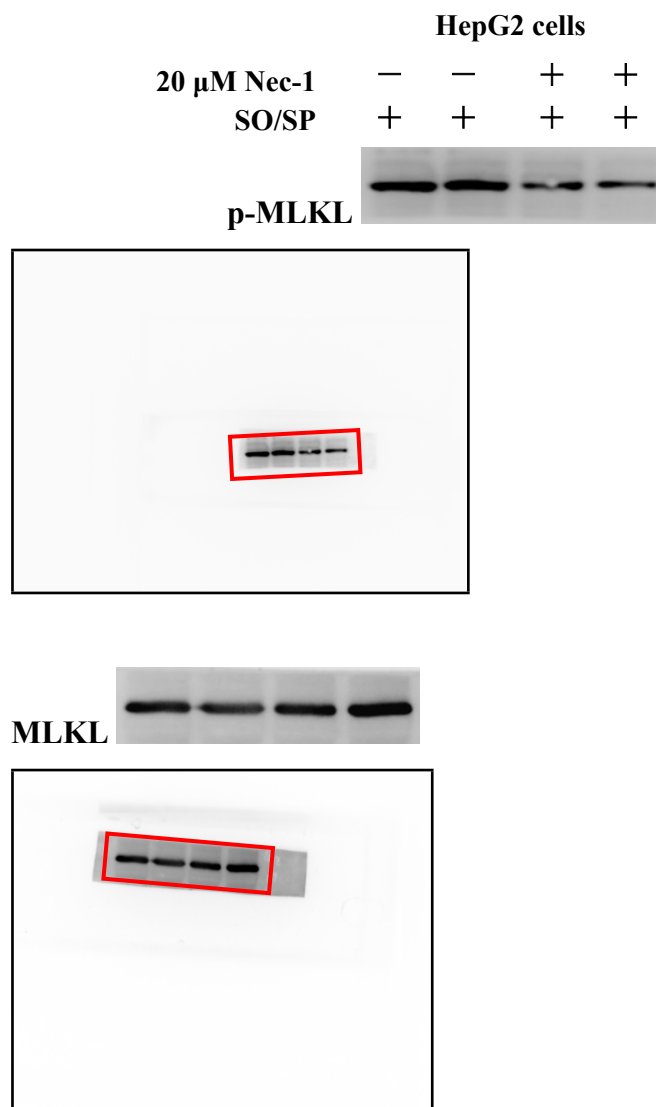

**Fig. 7I**

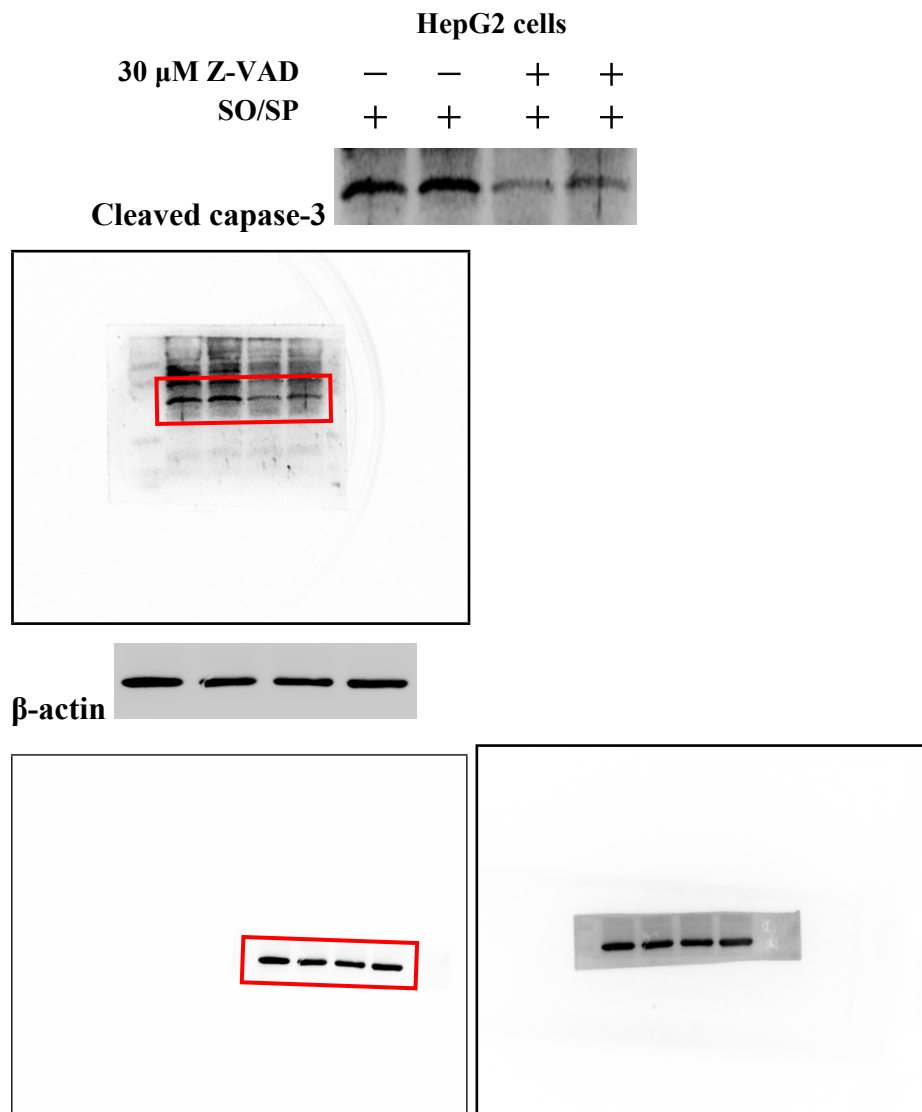

**Fig. 8G**

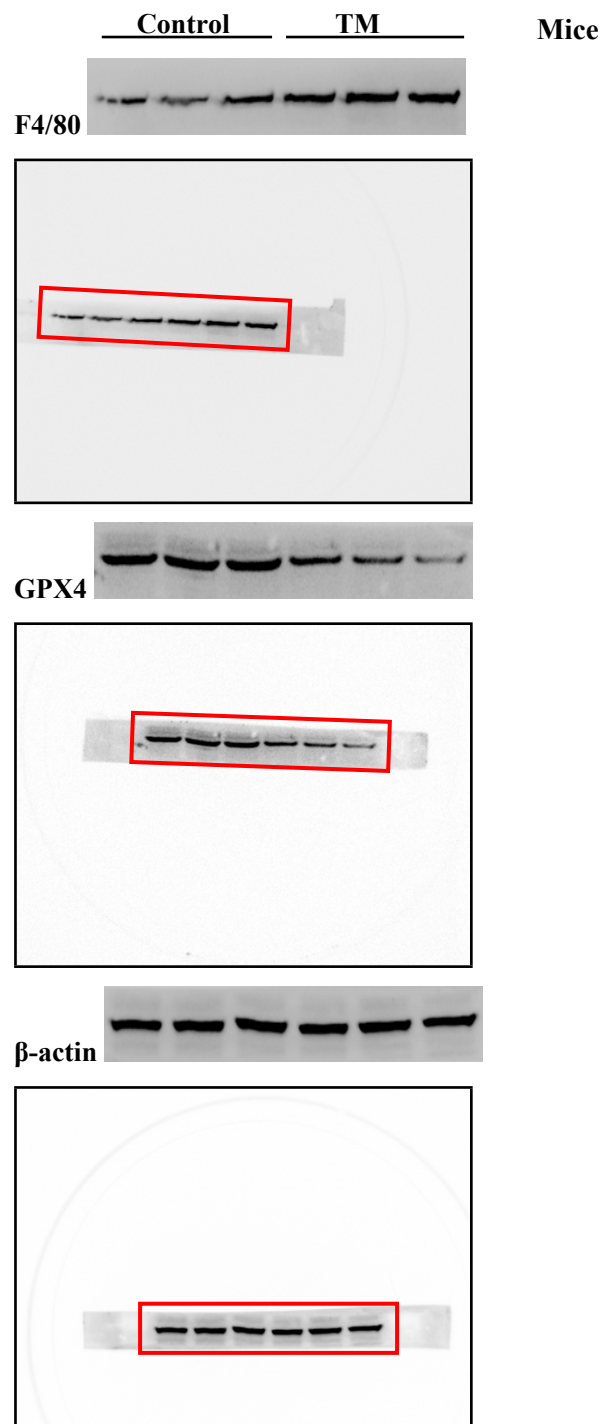

**Fig. 8H**

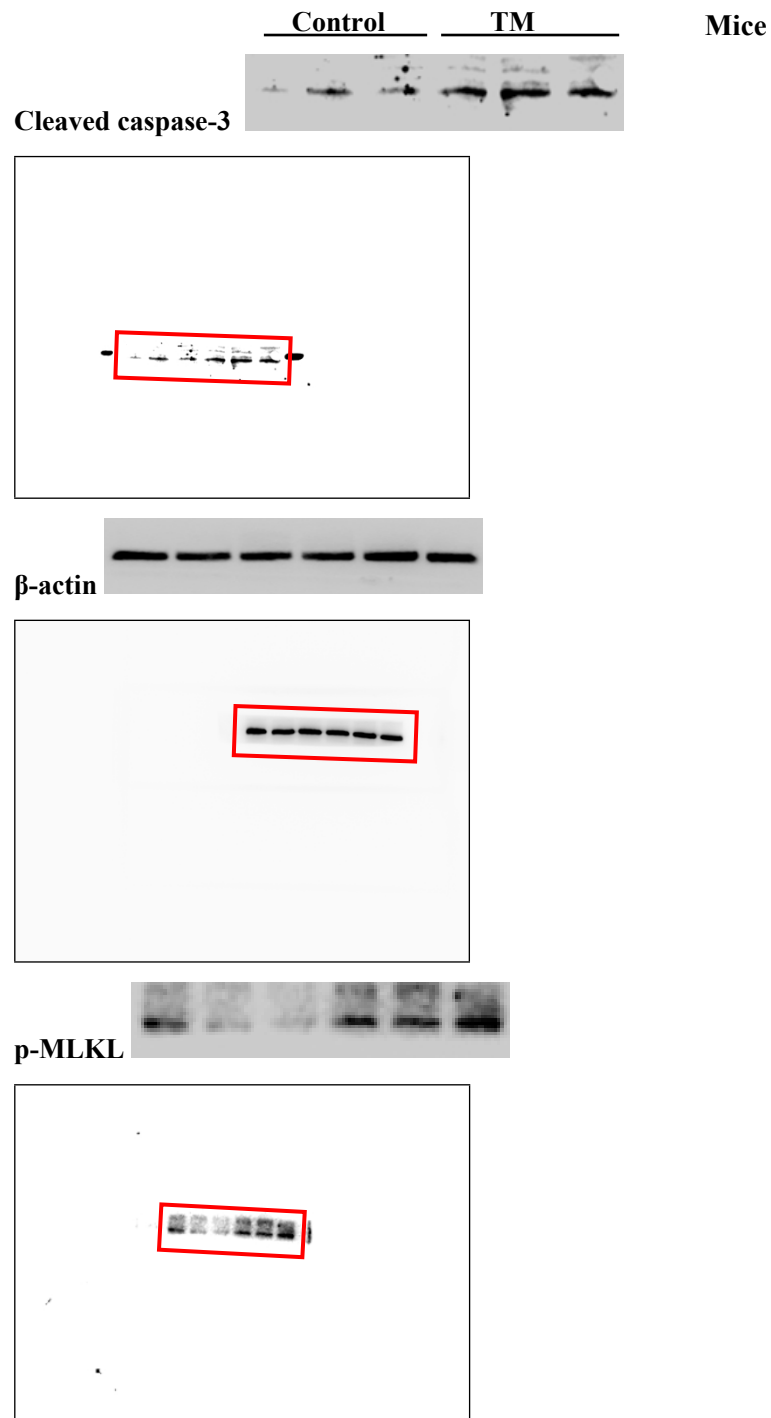

MLKL

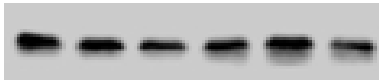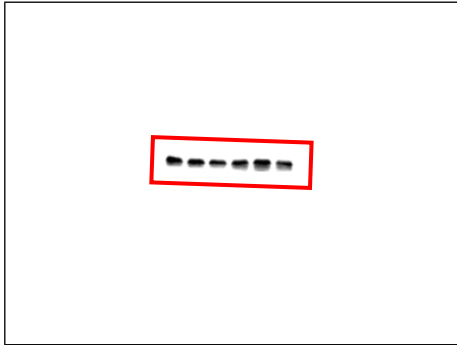

**Fig. 9A**

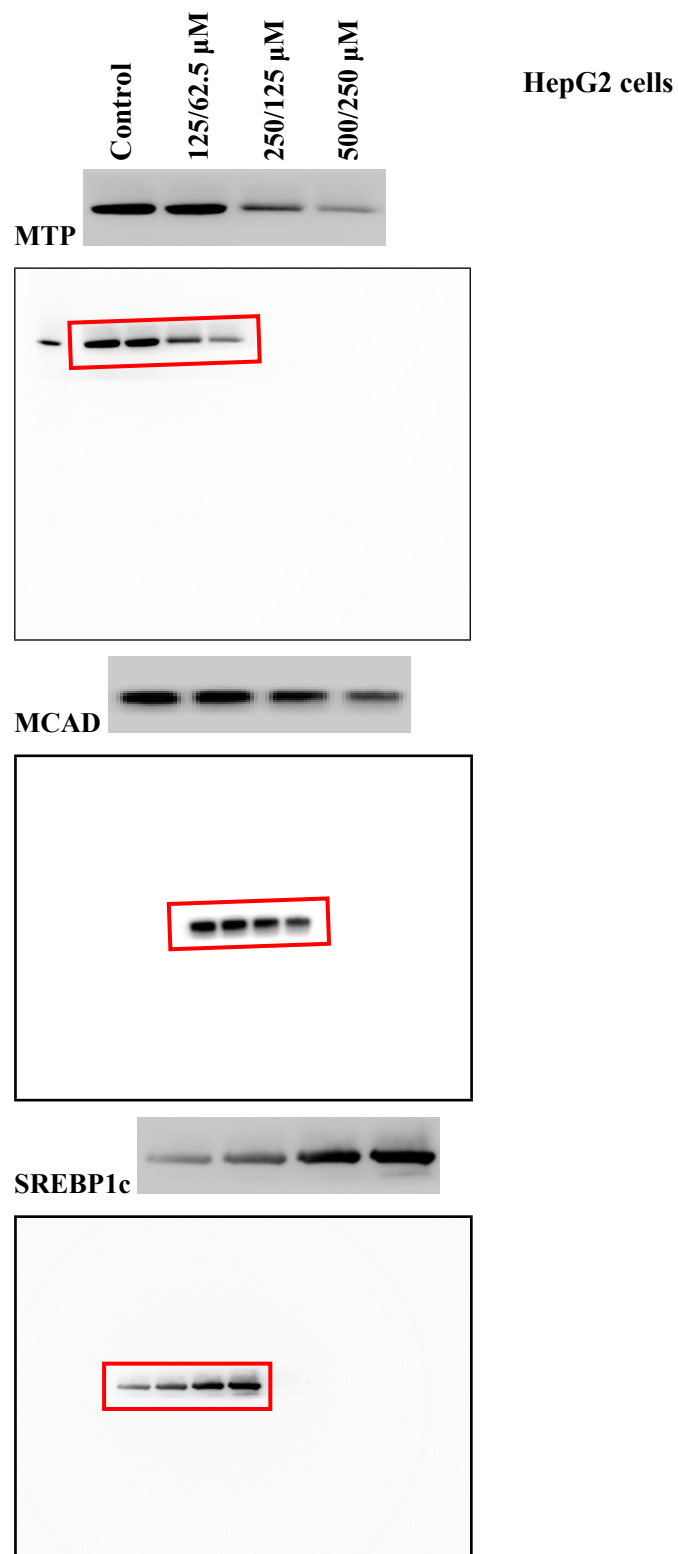

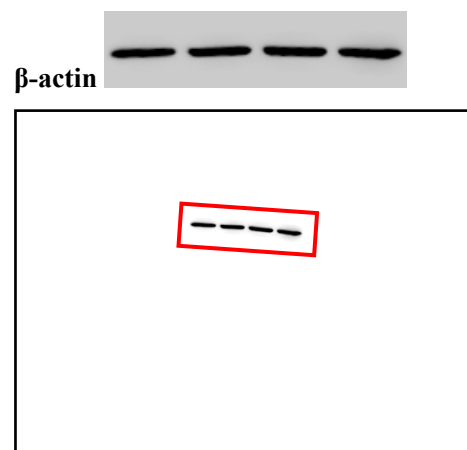

**Fig. 9B**

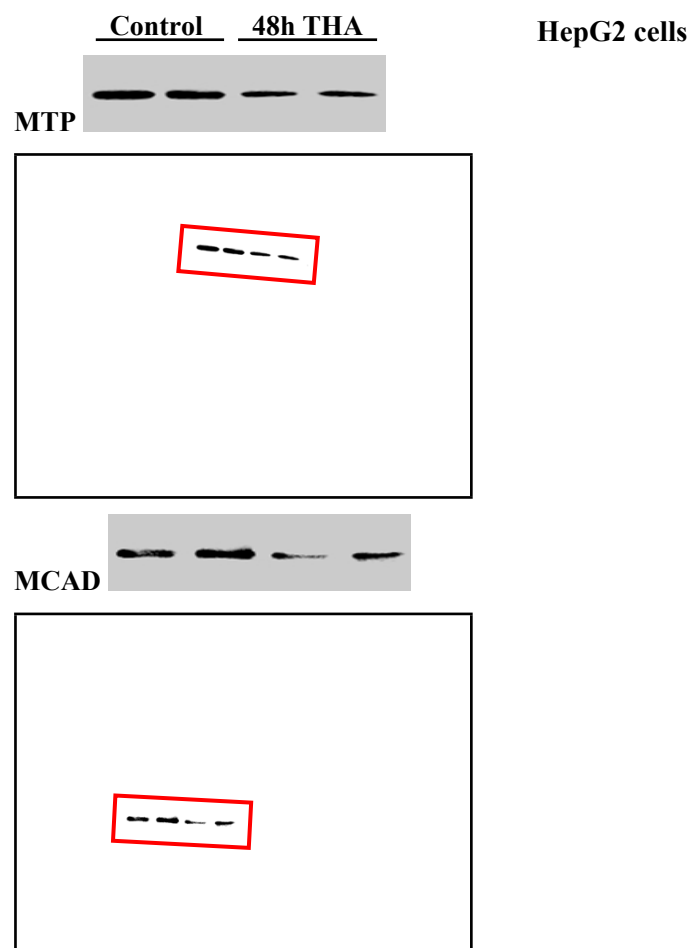

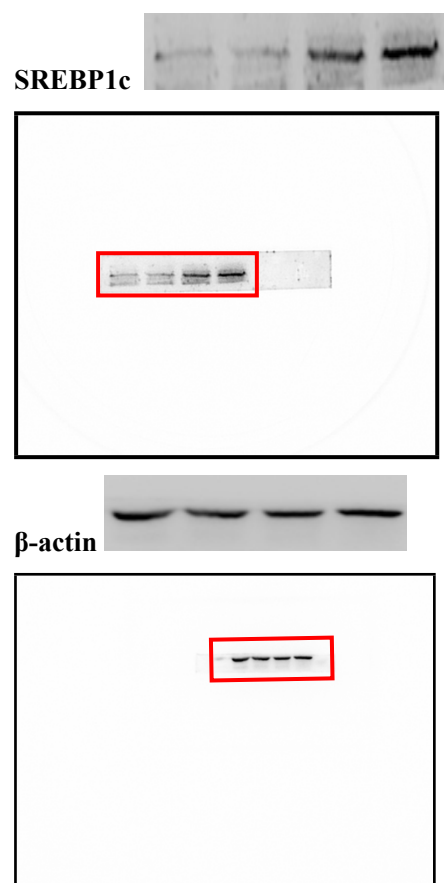

**Fig. 9C**

|                       |   |   |   |   |
|-----------------------|---|---|---|---|
| <b>Vehicle</b>        | + | + | — | — |
| <b><i>RELA</i>-KO</b> | — | — | + | + |
| <b>SO/SP</b>          | + | + | + | + |

**HepG2 cells**

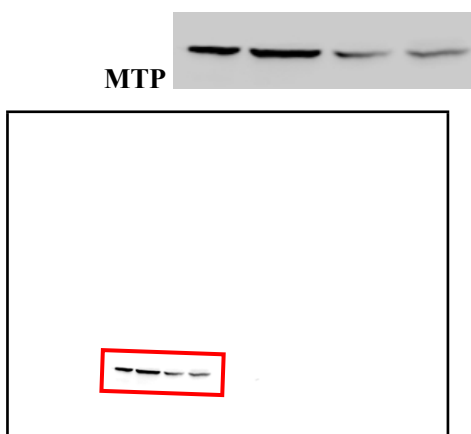

**MCAD**

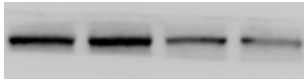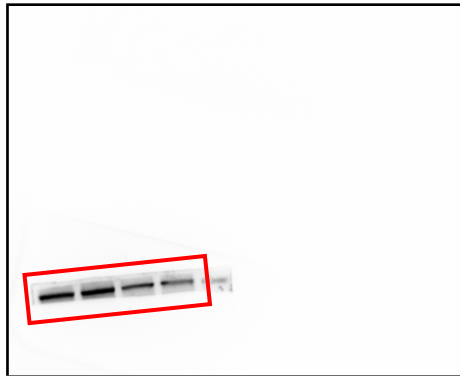

**SREBP1c**

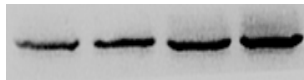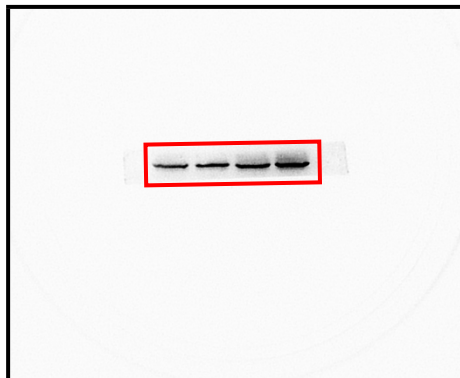

**$\beta$ -actin**

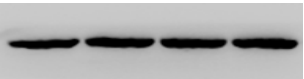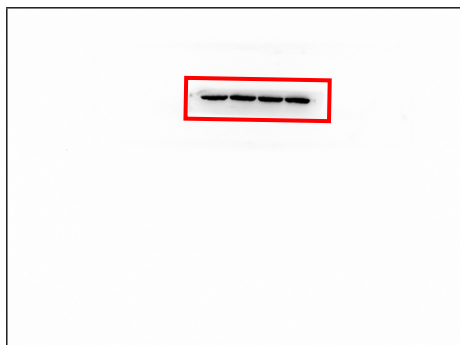

**Fig. 9D**

|                    |   |   |   |   |             |
|--------------------|---|---|---|---|-------------|
| Empty vector       | + | + | - | - | HepG2 cells |
| <i>RELA</i> -pcDNA | - | - | + | + |             |
| SO/SP              | + | + | + | + |             |

MTP

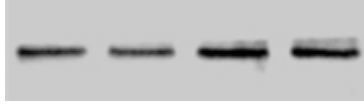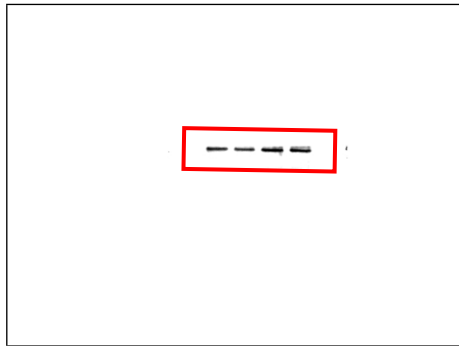

MCAD

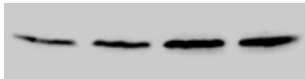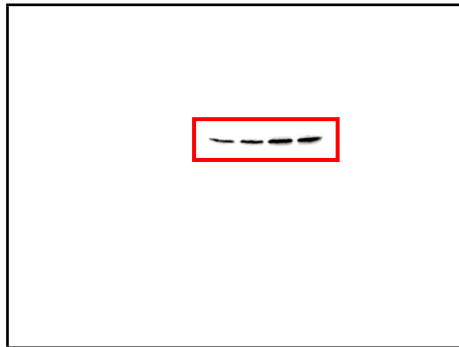

SREBP1c

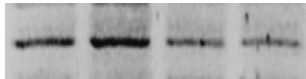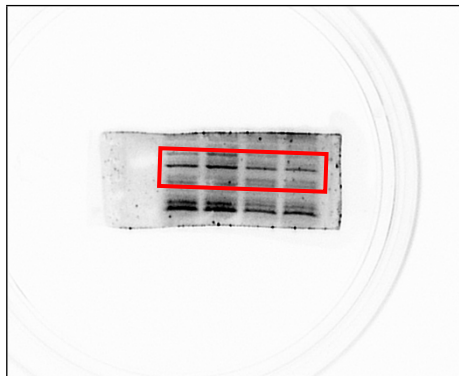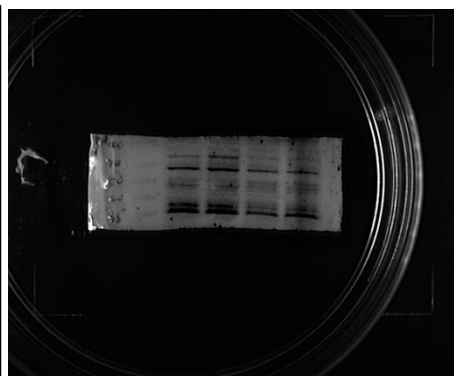

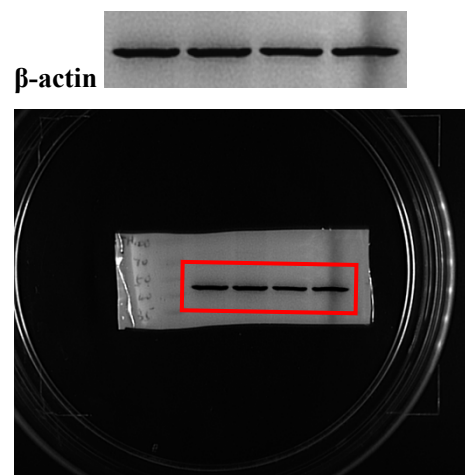

**Fig. 9I**

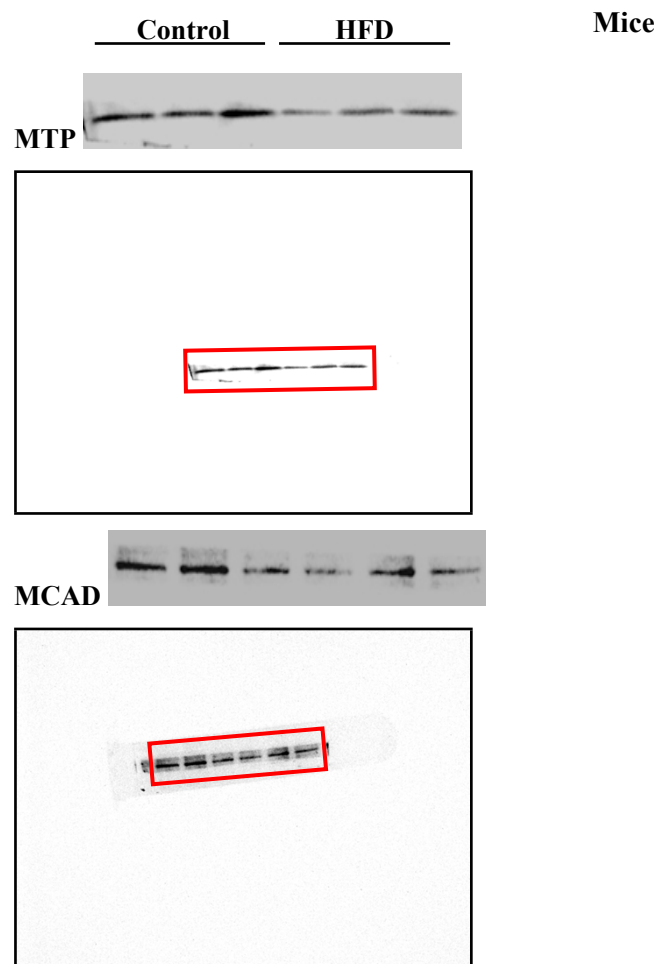

**SREBP1c**

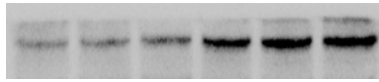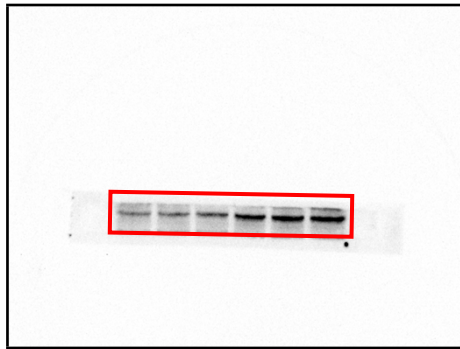

**$\beta$ -actin**

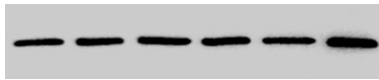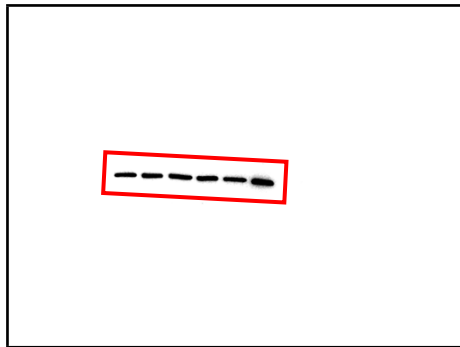

# Fig. 9J

|                   |   |   |   |   |
|-------------------|---|---|---|---|
| Control shRNA     | + | - | + | - |
| <i>Rela</i> shRNA | - | + | - | + |
| HFD               | - | - | + | + |

Mice

MTP

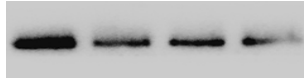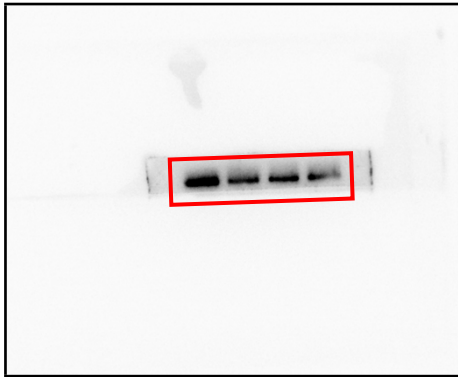

MCAD

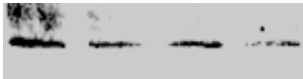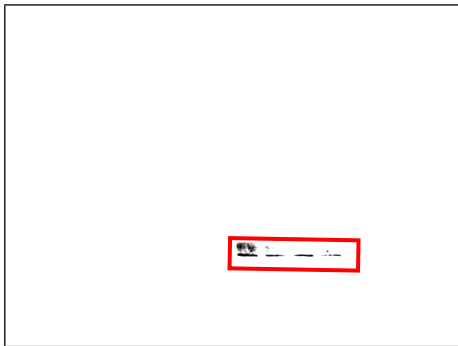

SREBP1c

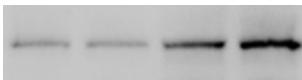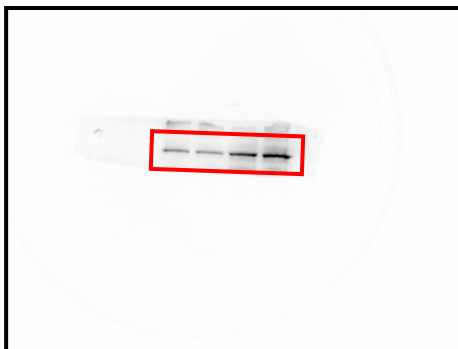

$\beta$ -actin

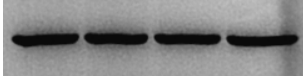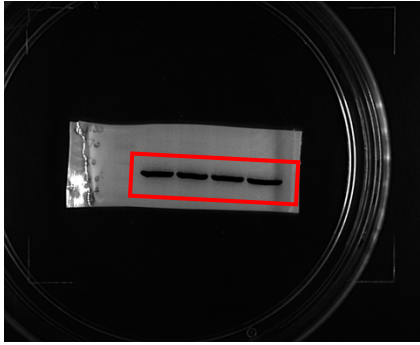

**Fig. 10H**

|                 |   |   |   |   |
|-----------------|---|---|---|---|
| Vehicle         | + | + | - | - |
| <i>RELA</i> -KO | - | - | + | + |
| SO/SP           | + | + | + | + |

HepG2 cells

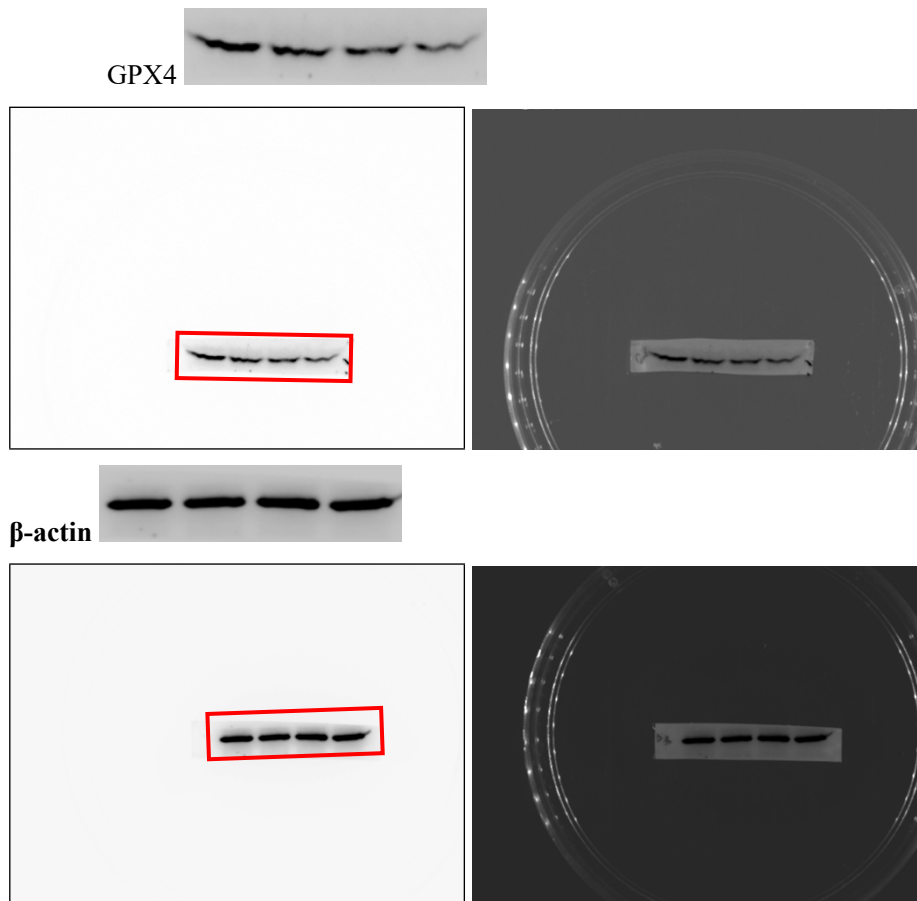

**Fig. 10I**

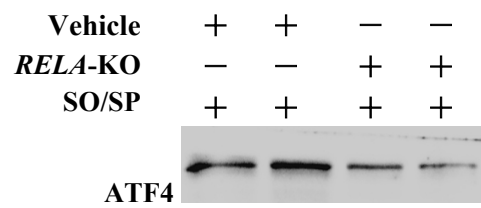

HepG2 cells

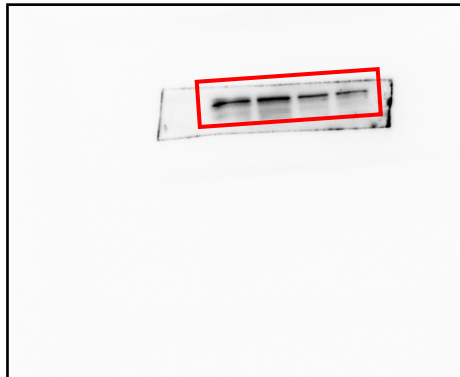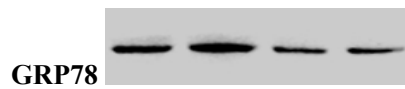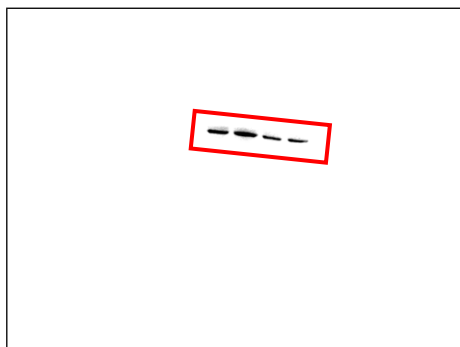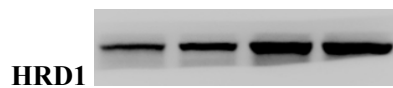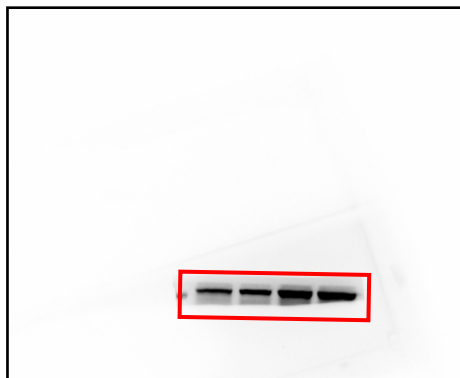

CHOP

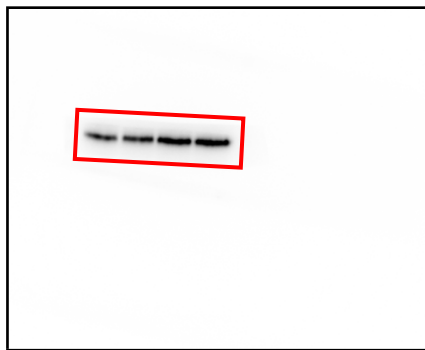

$\beta$ -actin

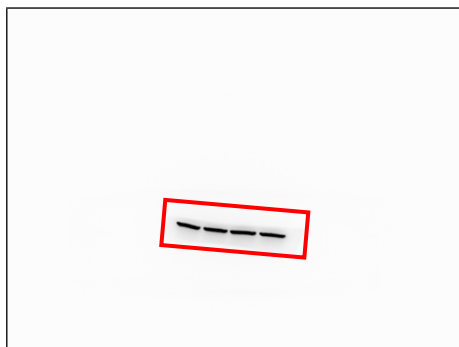

**Fig. 10J**

|                    |   |   |   |   |
|--------------------|---|---|---|---|
| Empty vector       | + | + | - | - |
| <i>RELA</i> -pcDNA | - | - | + | + |
| SO/SP              | + | + | + | + |

ATF4

HepG2 cells

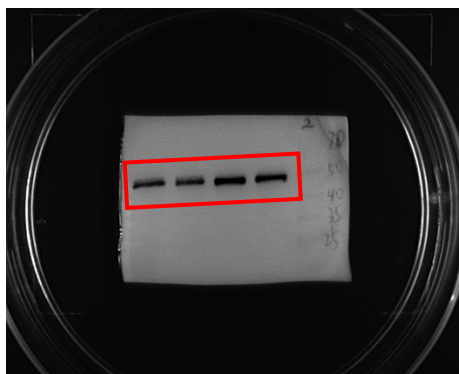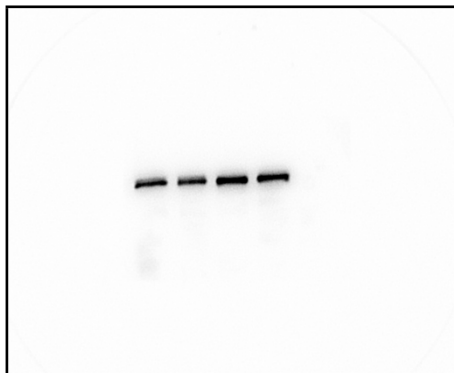

**GRP78**

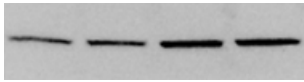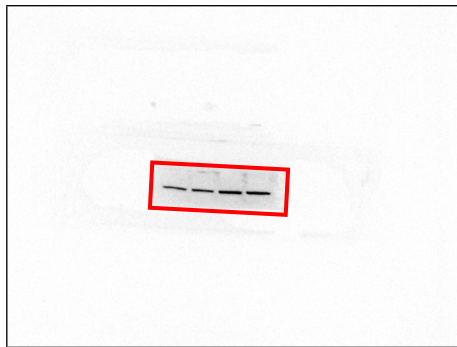

**HRD1**

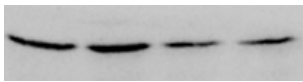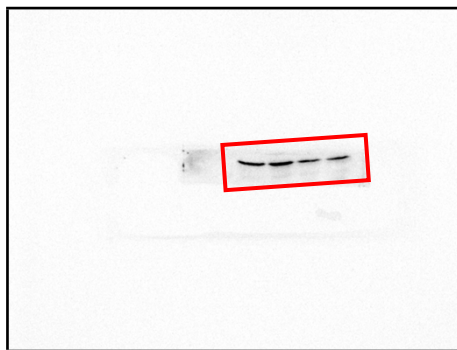

**CHOP**

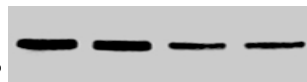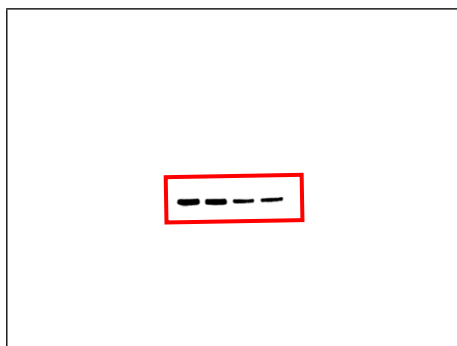

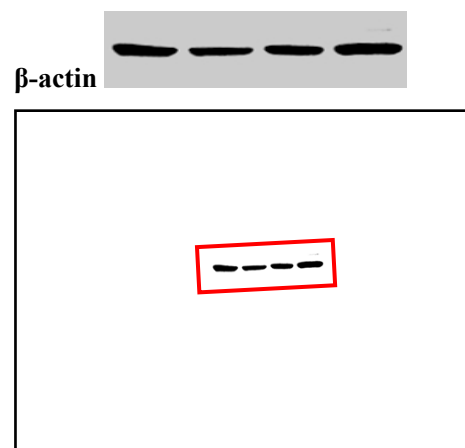

**Fig. 10L**

|                   |   |   |   |   |      |
|-------------------|---|---|---|---|------|
| Control shRNA     | + | - | + | - | Mice |
| <i>Rela</i> shRNA | - | + | - | + |      |
| HFD               | - | - | + | + |      |

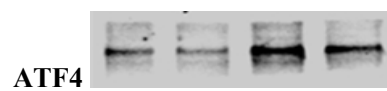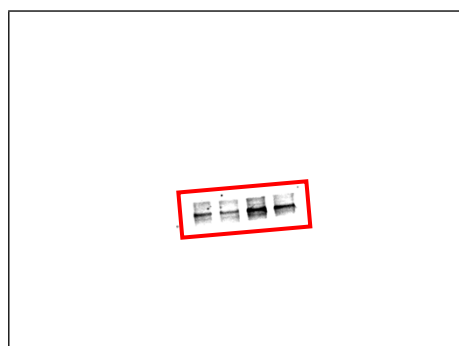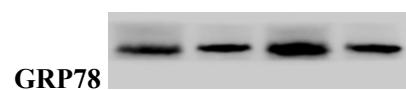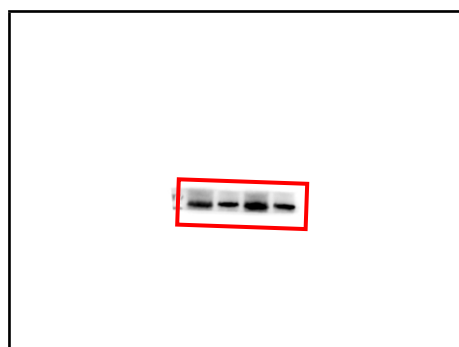

**HRD1**

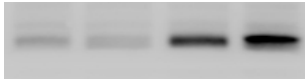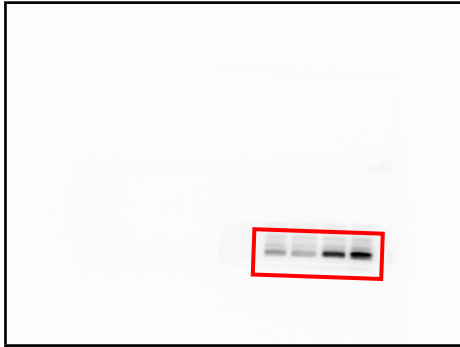

**CHOP**

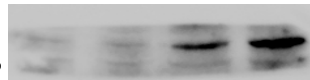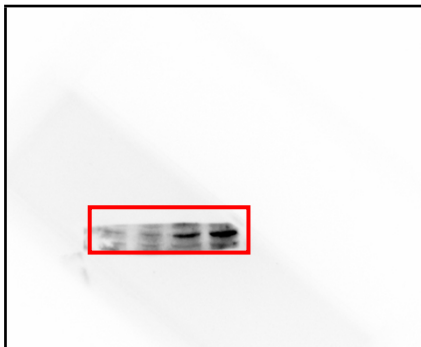

**$\beta$ -actin**

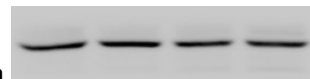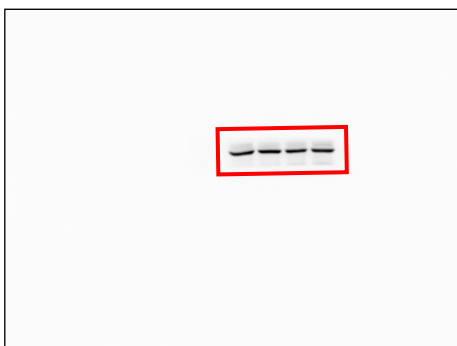

## Supplementary Fig. 1D

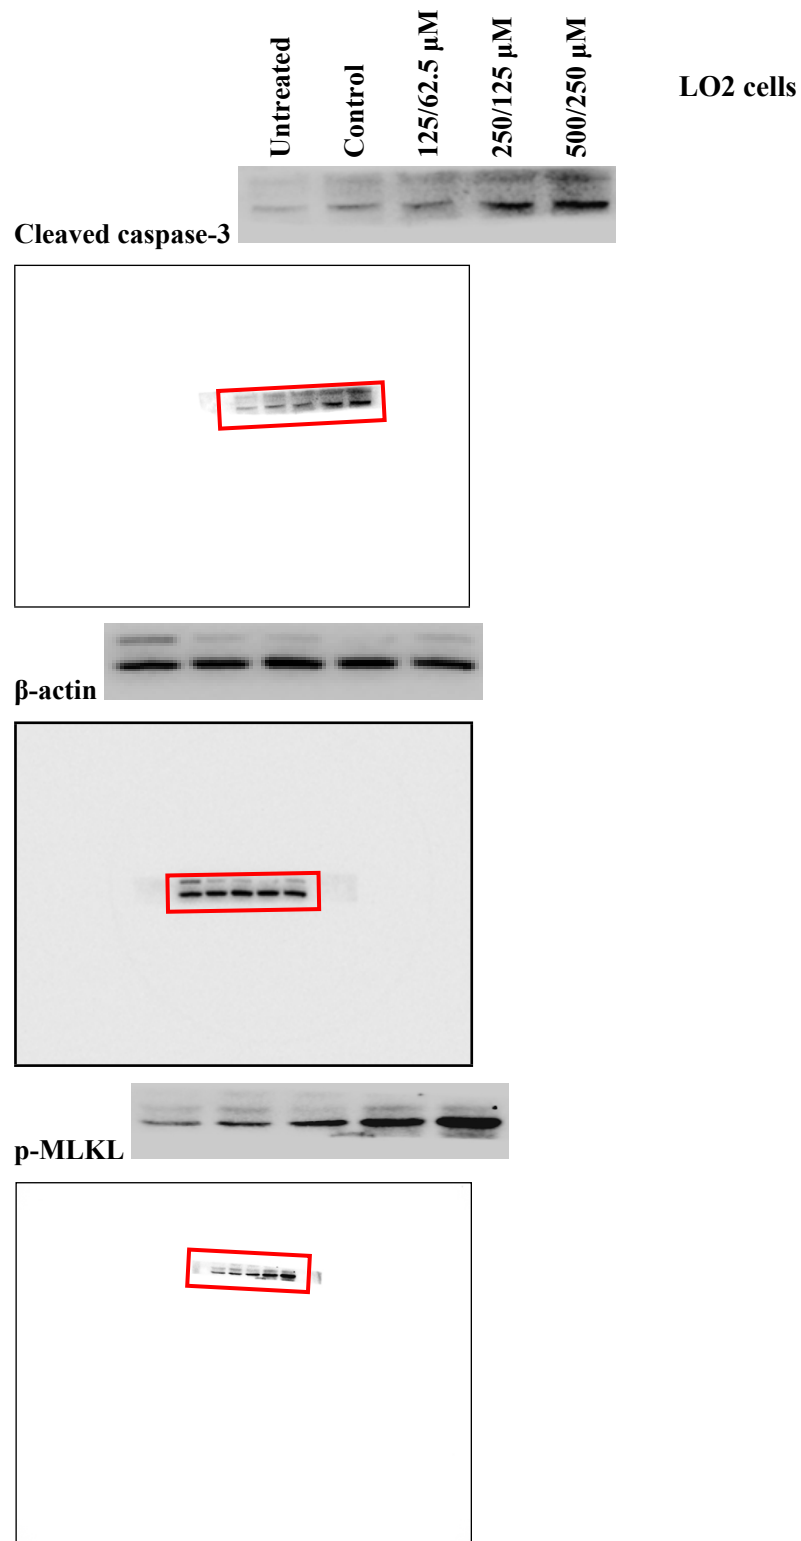

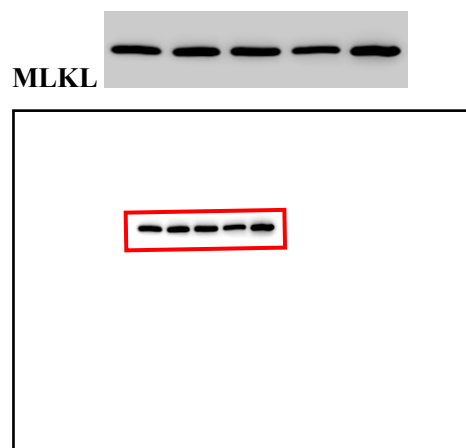

## Supplementary Fig. 1E

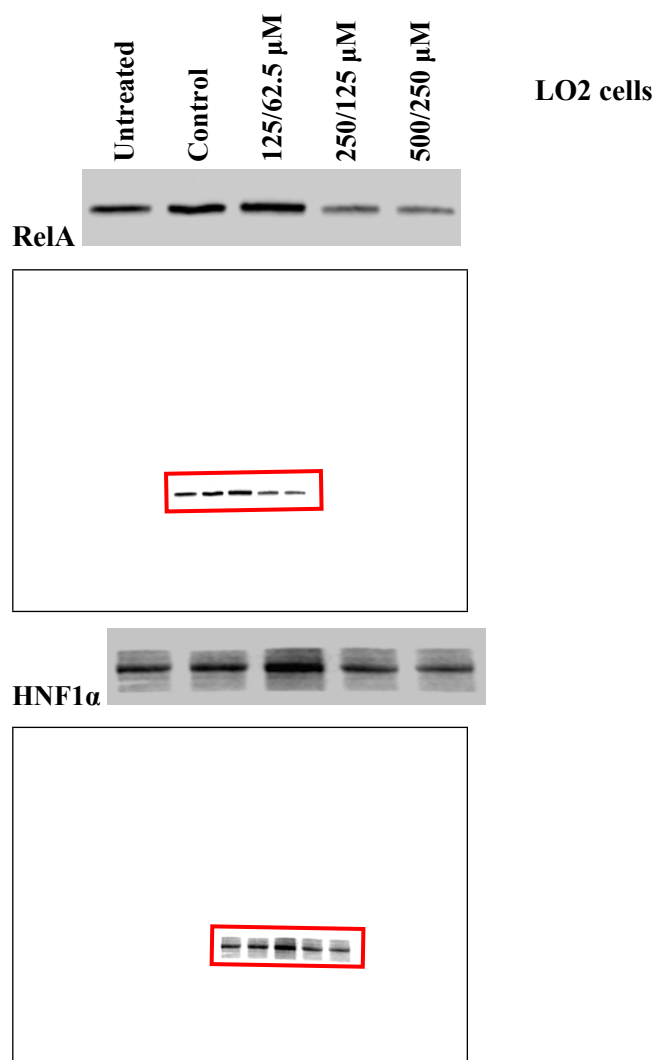

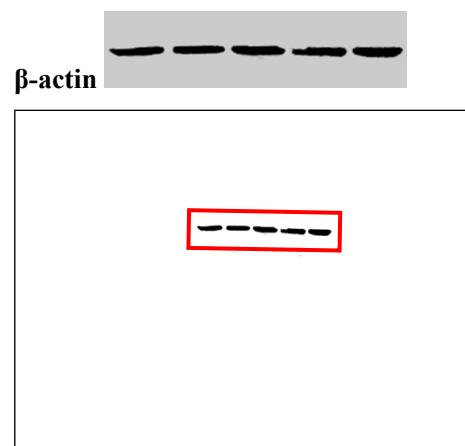

## Supplementary Fig. 2A

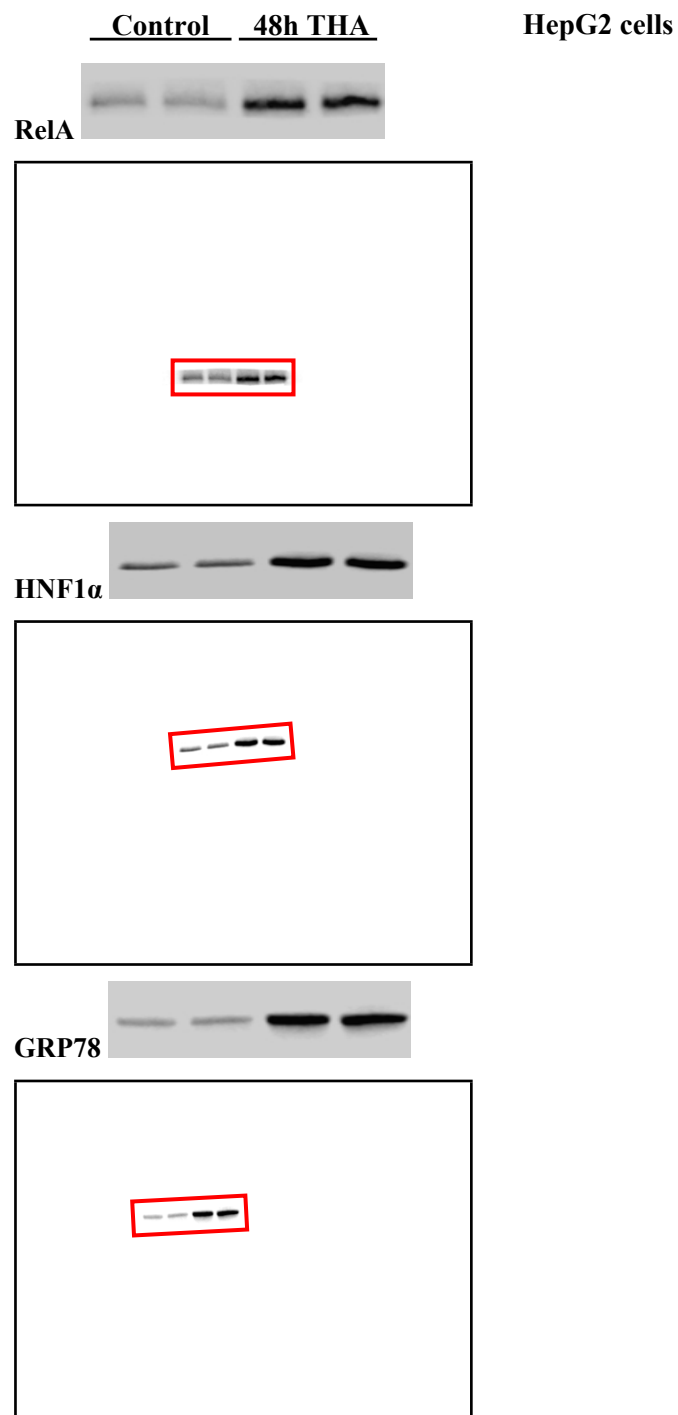

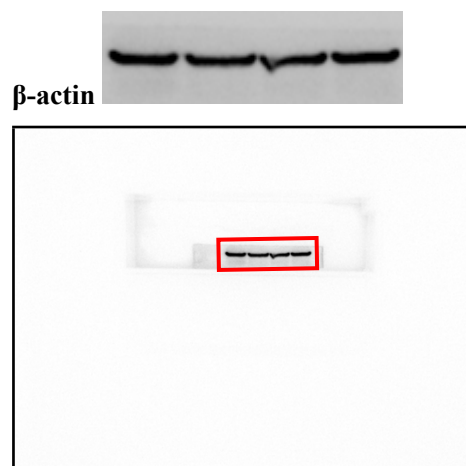

## Supplementary Fig. 2J

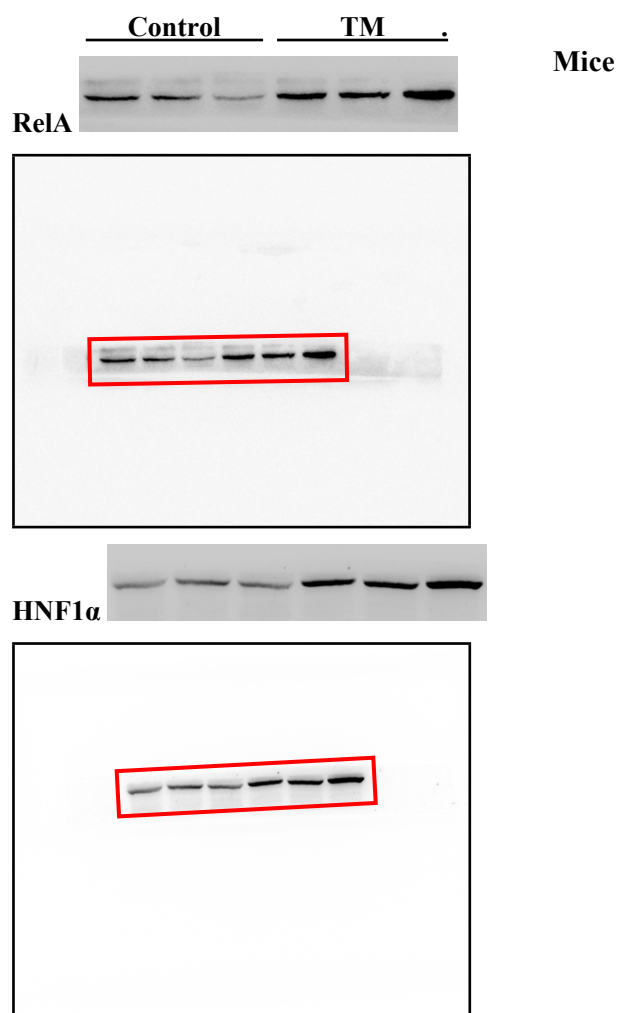

GRP78

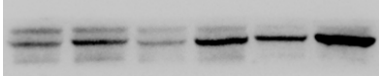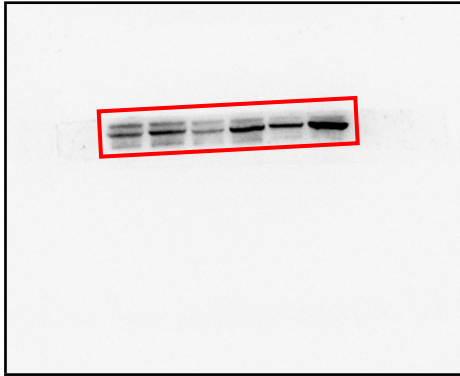

$\beta$ -actin

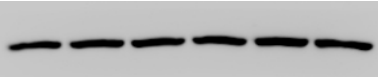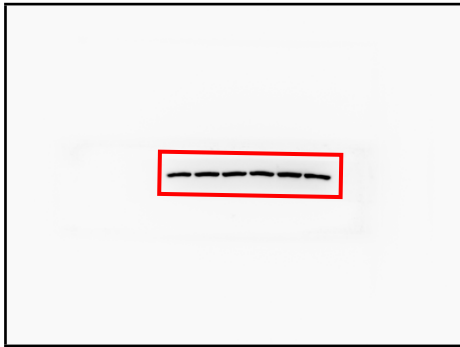

## Supplementary Fig. 3A

|                   |   |   |   |   |
|-------------------|---|---|---|---|
| Control shRNA     | + | - | + | - |
| <i>RELA</i> shRNA | - | + | - | + |
| BSA               | + | + | - | - |
| SO/SP             | - | - | + | + |

LO2 cells

RelA

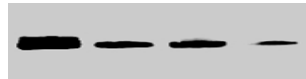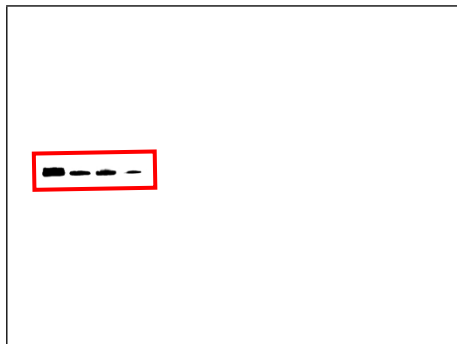

HNF1α

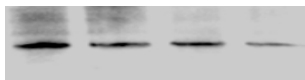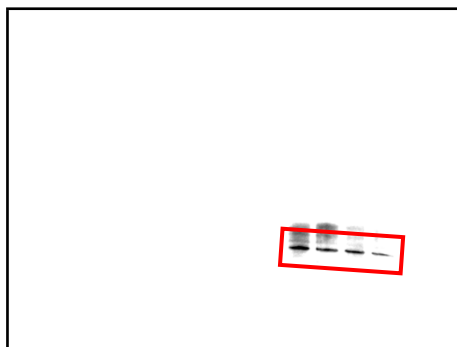

β-actin

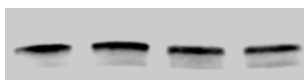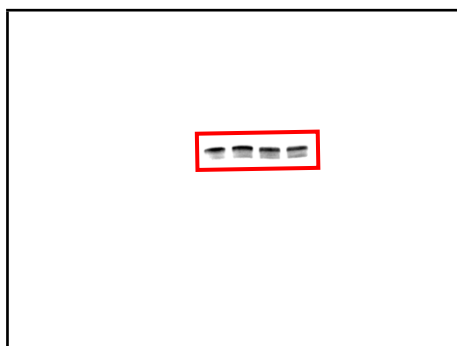

## Supplementary Fig. 2B

|                    |   |   |   |   |           |
|--------------------|---|---|---|---|-----------|
| Empty vector       | + | + | - | - | LO2 cells |
| <i>RELA</i> -pcDNA | - | - | + | + |           |
| SO/SP              | + | + | + | + |           |

RelA

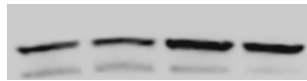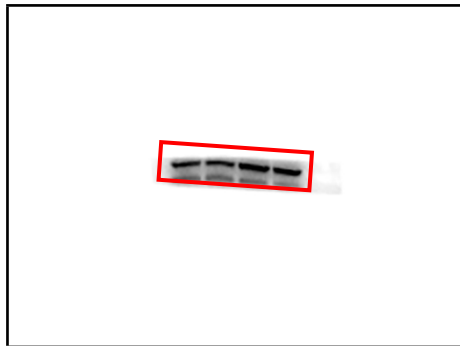

HNF1 $\alpha$

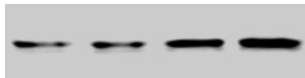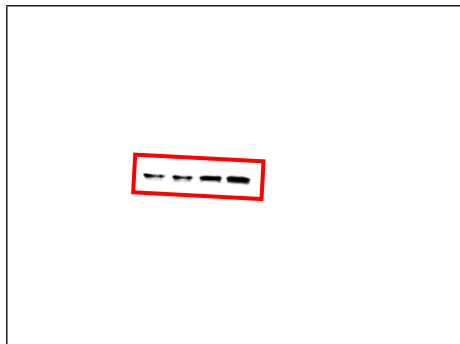

$\beta$ -actin

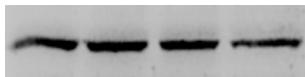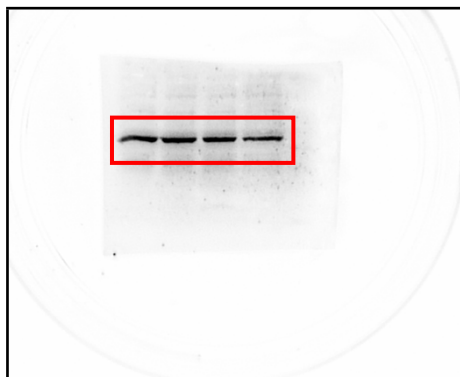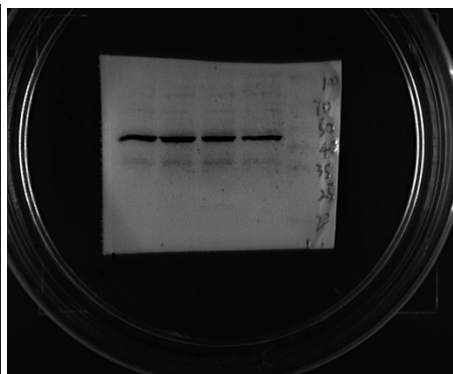

# Supplementary Fig. 3C

|                    |   |   |   |   |
|--------------------|---|---|---|---|
| Control shRNA      | + | - | + | - |
| <i>HNF1A</i> shRNA | - | + | - | + |
| BSA                | + | + | - | - |
| SO/SP              | - | - | + | + |

LO2 cells

RelA

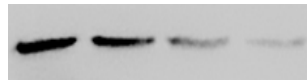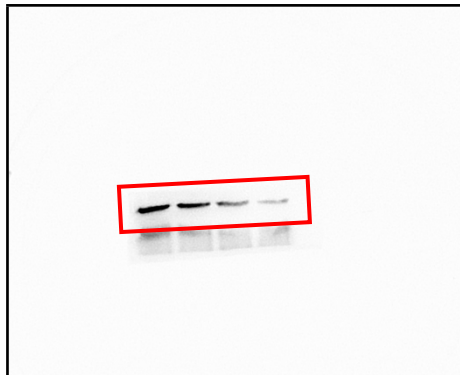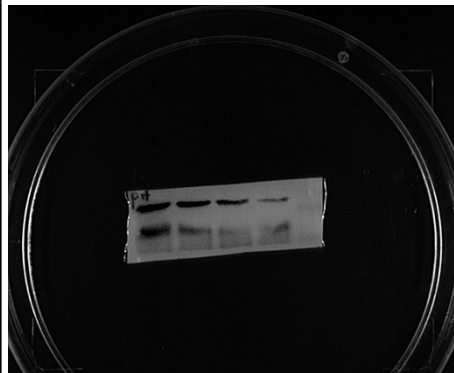

HNF1 $\alpha$

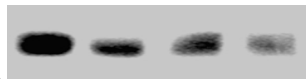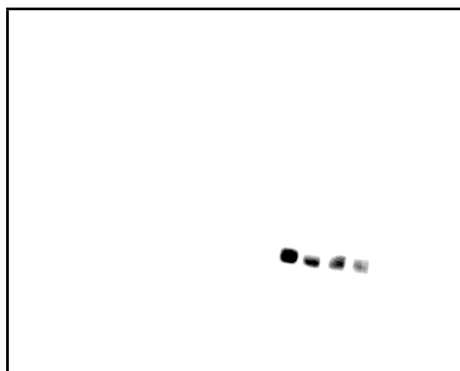

$\beta$ -actin

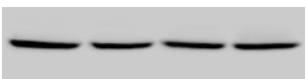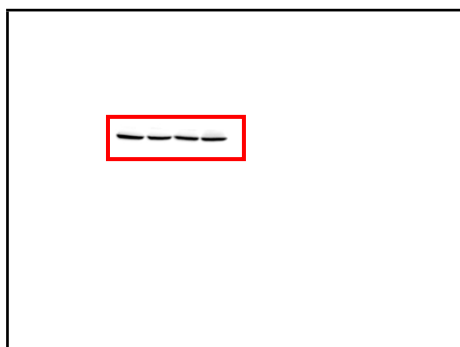

## Supplementary Fig. 4E

|                       |   |   |   |   |           |
|-----------------------|---|---|---|---|-----------|
| Control shRNA         | + | − | + | − | LO2 cells |
| <i>RELA</i> shRNA     | − | + | − | + |           |
| BSA                   | + | + | + | + |           |
| 250/125 $\mu$ M SO/SP | − | − | + | + |           |

Cleaved caspase-3

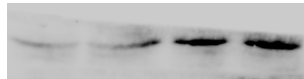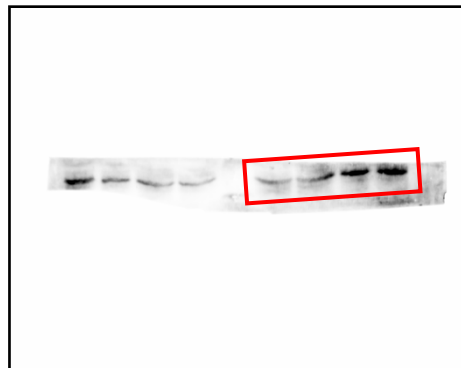

$\beta$ -actin

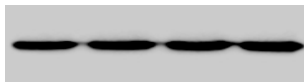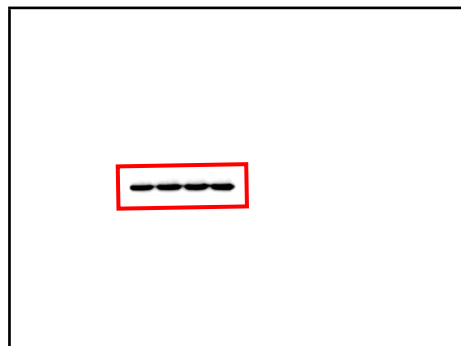

p-MLKL

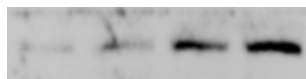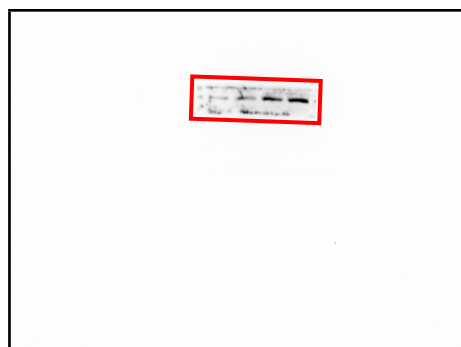

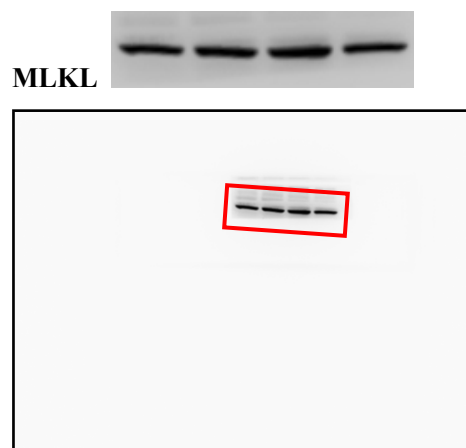

## Supplementary Fig. 3J

|                       |   |   |   |   |
|-----------------------|---|---|---|---|
| Empty vector          | + | + | - | - |
| <i>RELA</i> -pcDNA    | - | - | + | + |
| 250/125 $\mu$ M SO/SP | + | + | + | + |

LO2 cells

Cleaved caspase-3

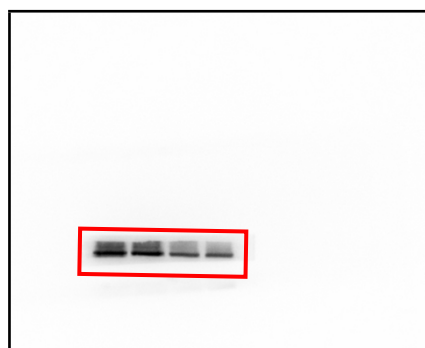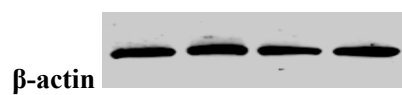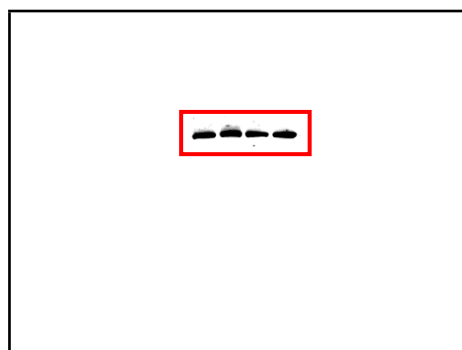

**p-MLKL**

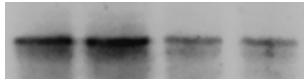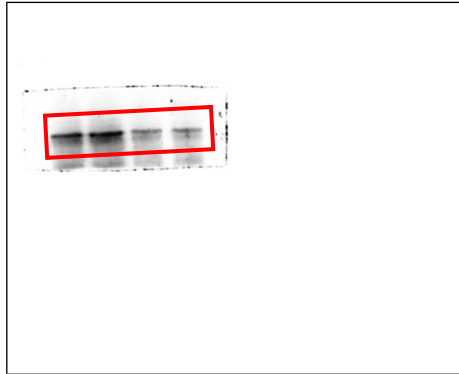

**MLKL**

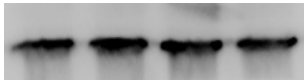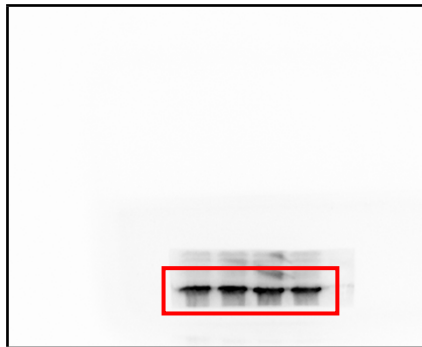

# Supplementary Fig. 5E

|                    |   |   |   |   |
|--------------------|---|---|---|---|
| Control shRNA      | + | - | + | - |
| <i>HNF1A</i> shRNA | - | + | - | + |
| BSA                | + | + | - | - |
| SO/SP              | - | - | + | + |

LO2 cells

Cleaved caspase-3

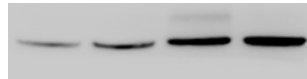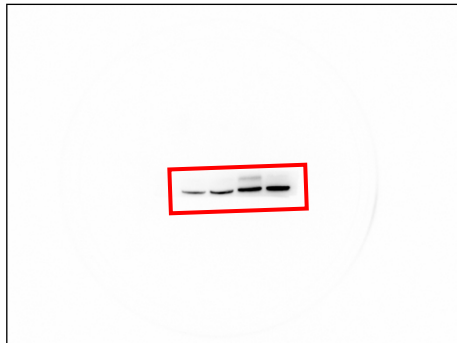

$\beta$ -actin

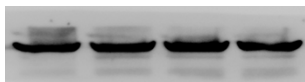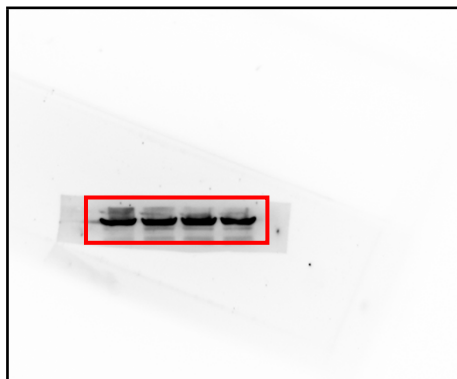

p-MLKL

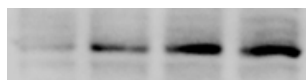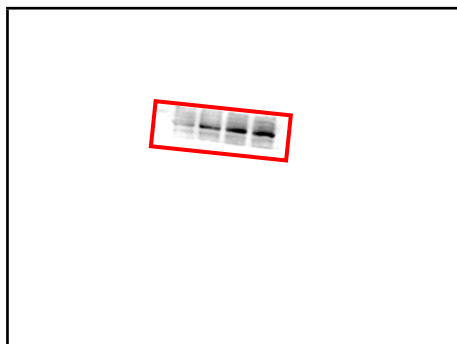

MLKL

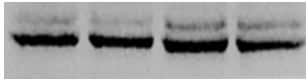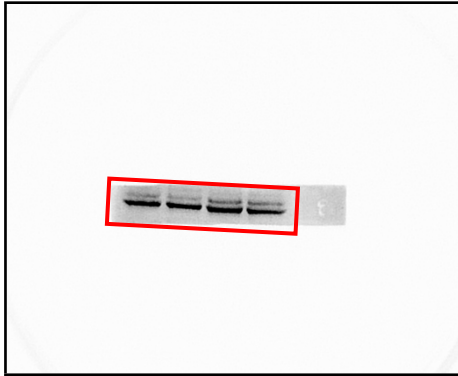

## Supplementary Fig. 6L

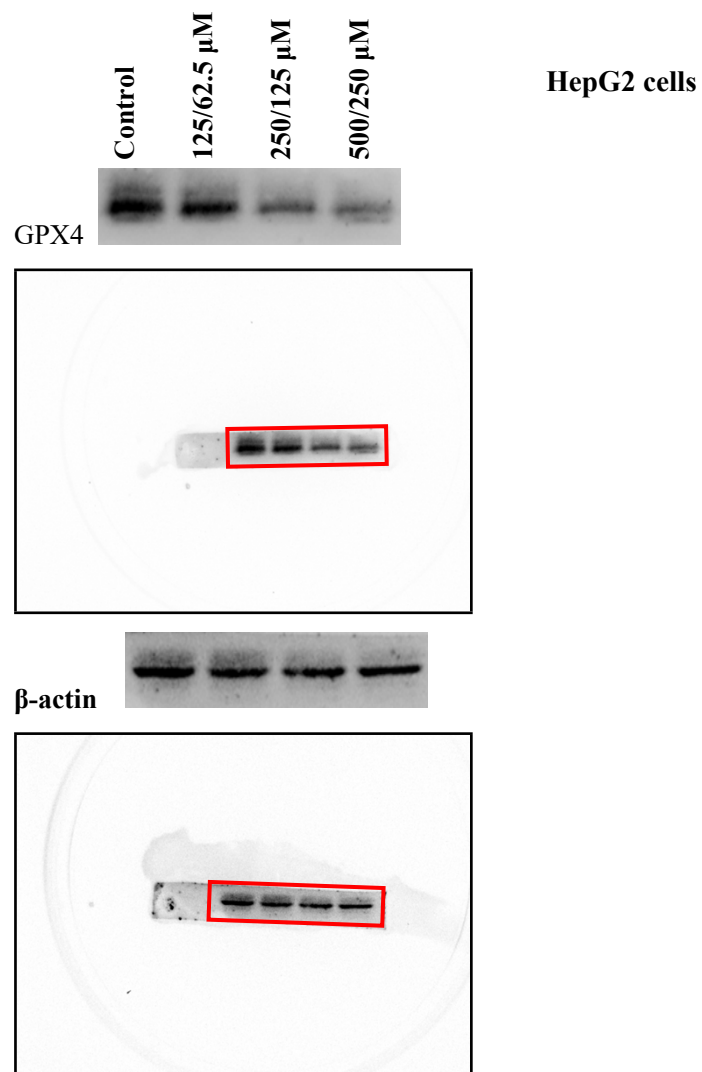

## Supplementary Fig. 6M

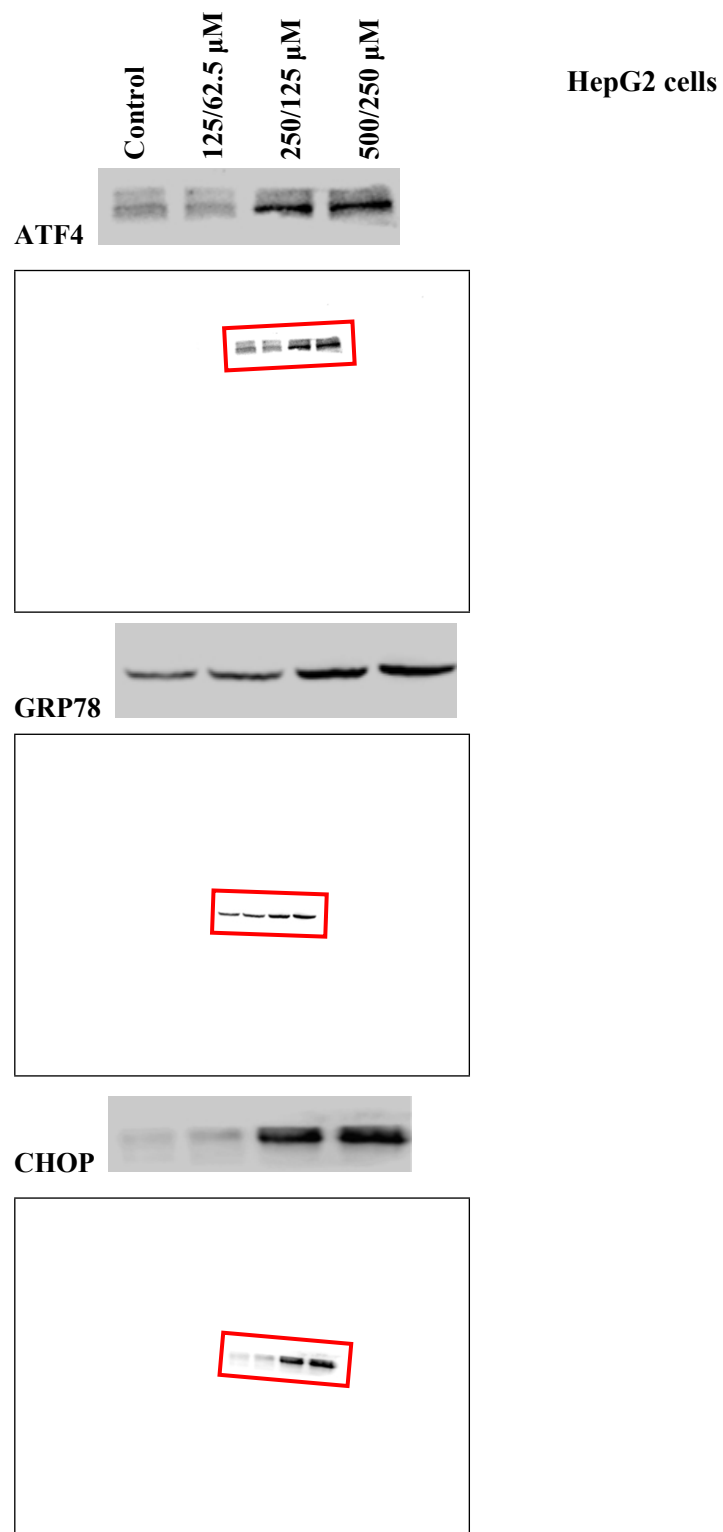

$\beta$ -actin

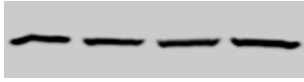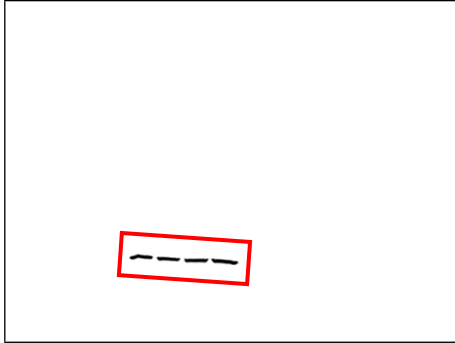

## Supplementary Fig. 7D

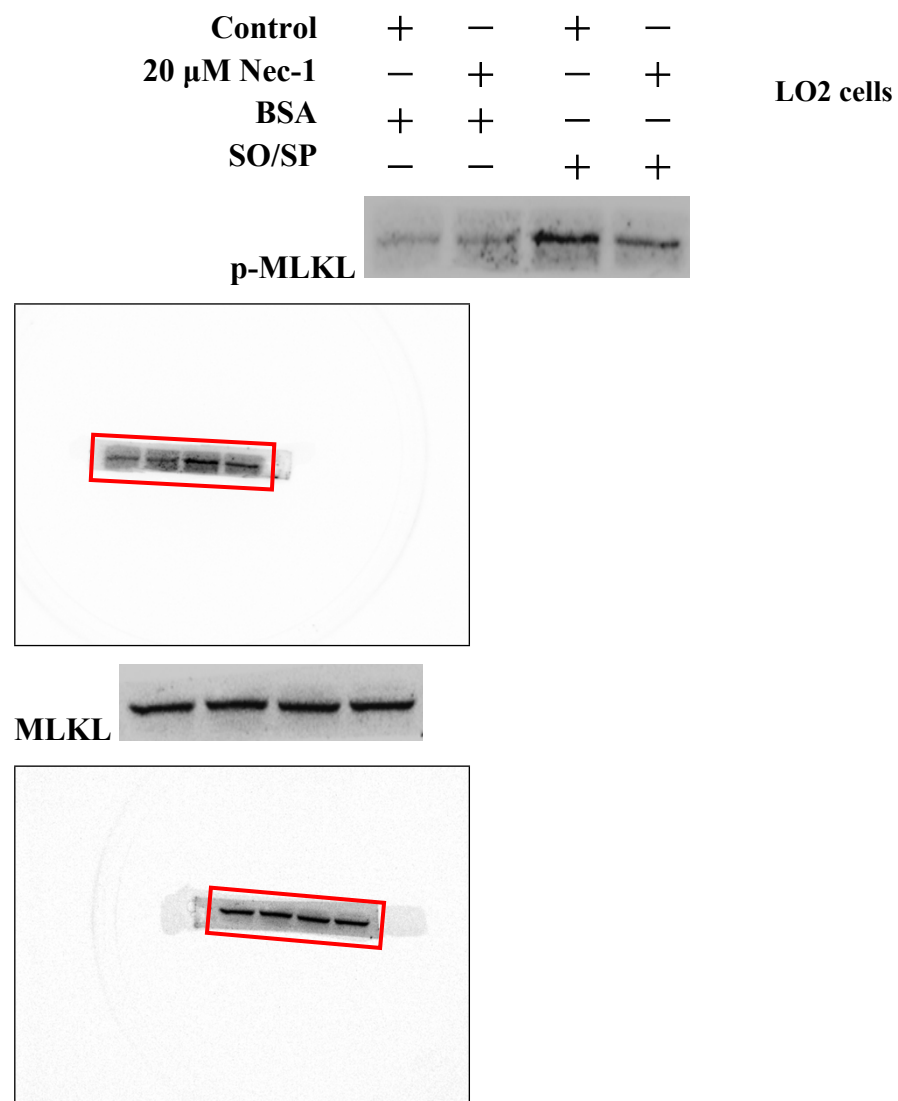

## Supplementary Fig. 7I

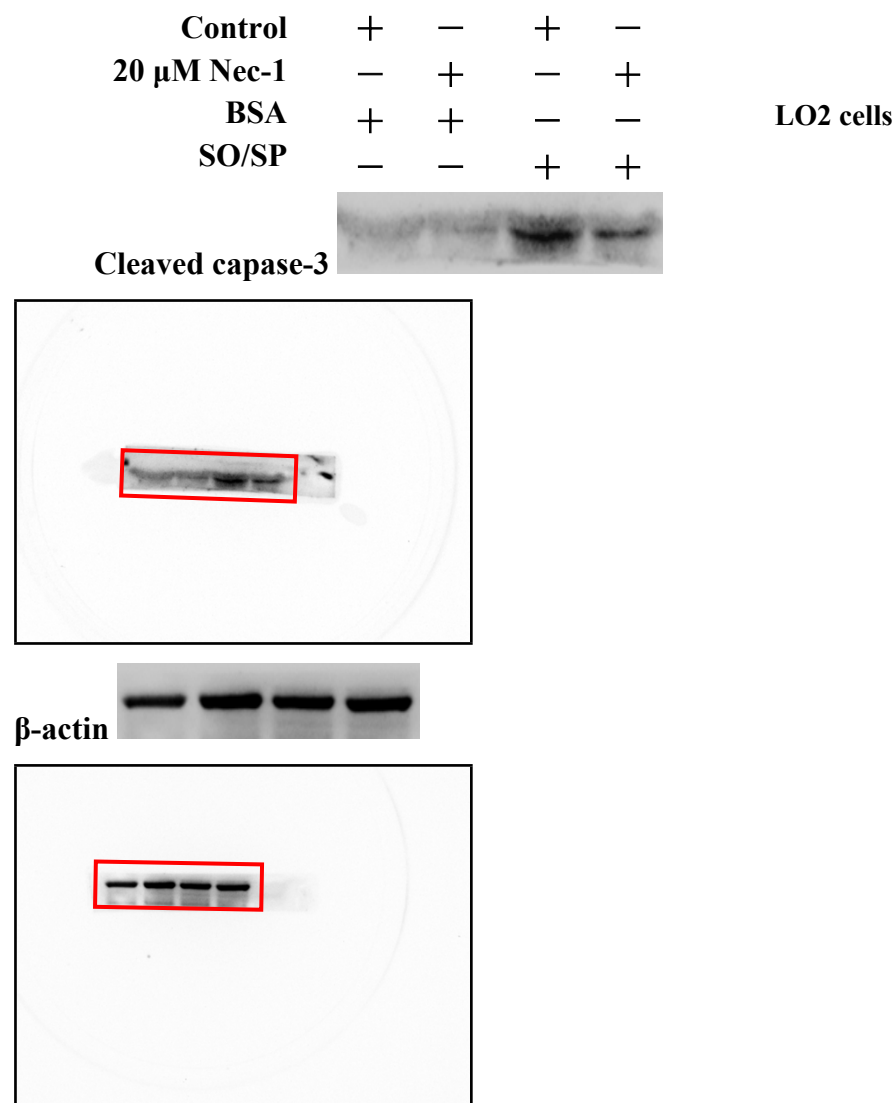

## Supplementary Fig. 8M

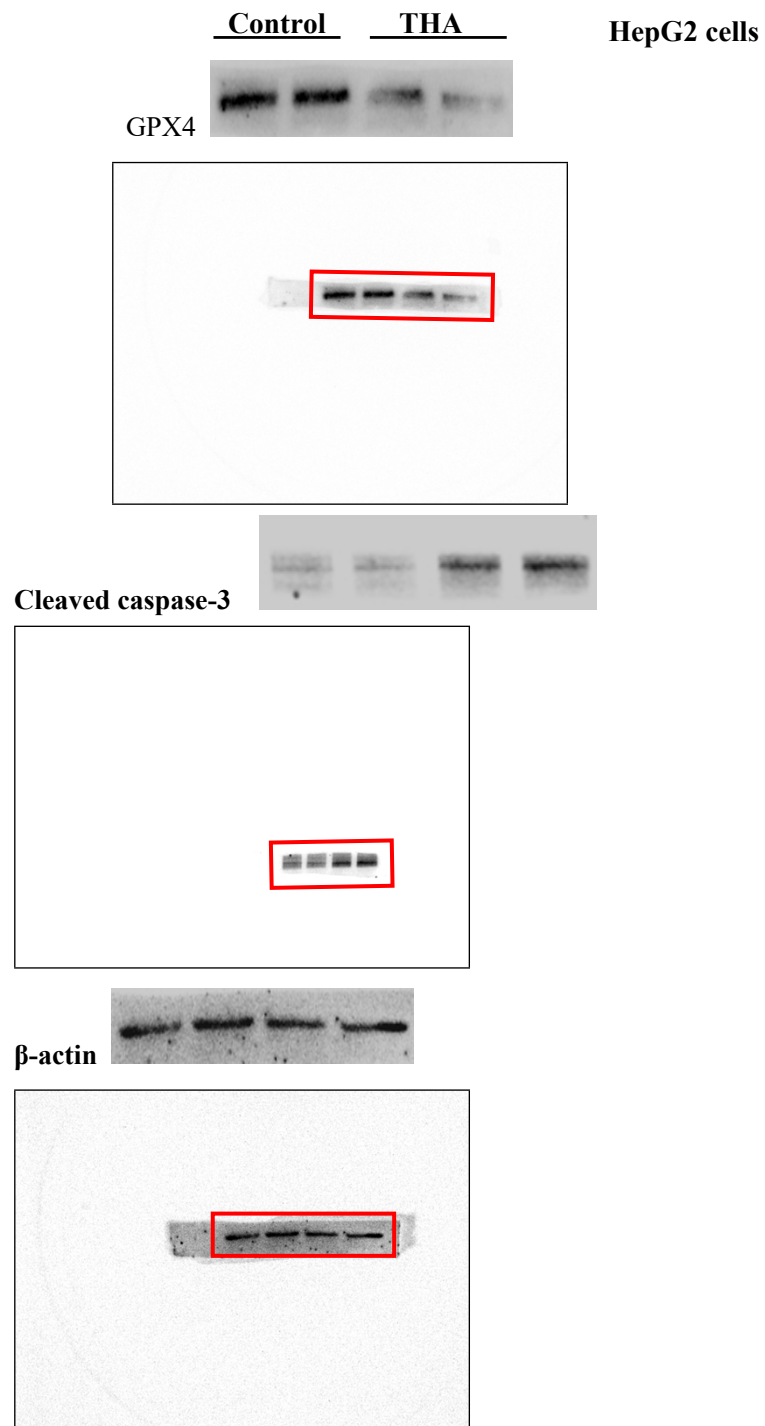

p-MLKL

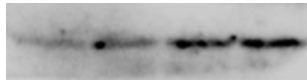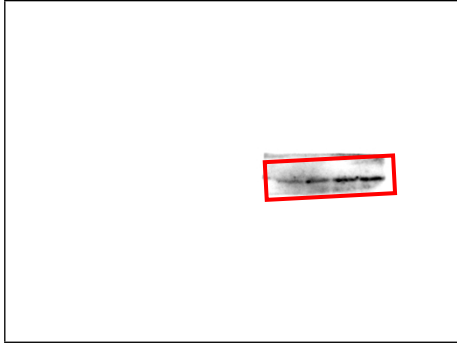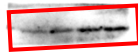

MLKL

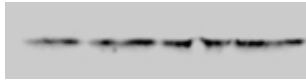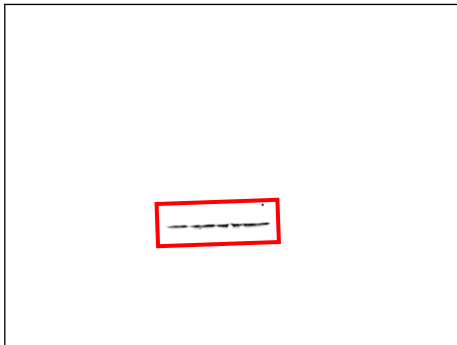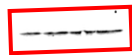

## Supplementary Fig. 9A

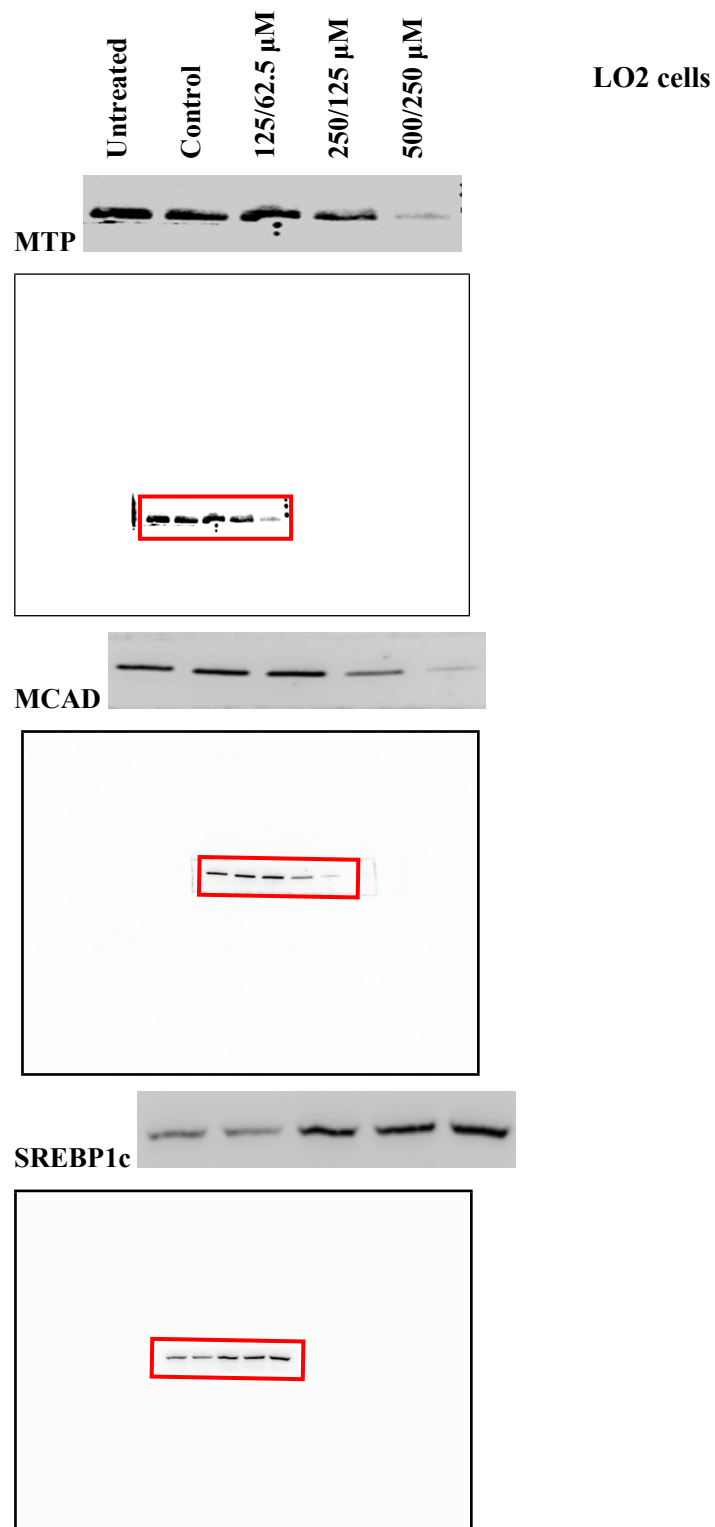

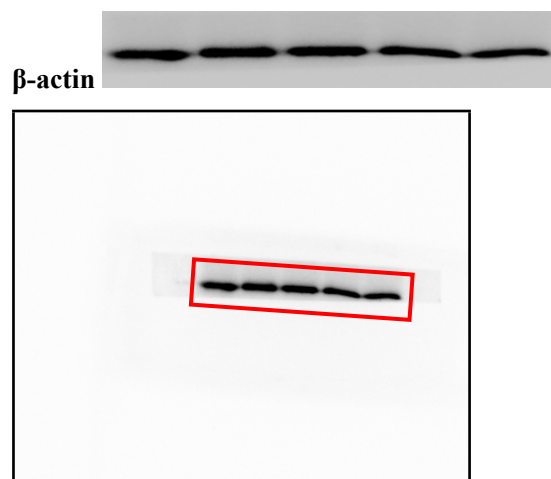

## Supplementary Fig. 9B

0.5  $\mu$ M THA    0h    12h    24h    48h

MTP

LO2 cells

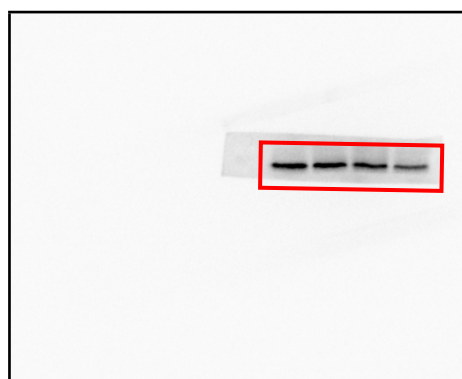

MCAD

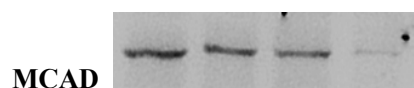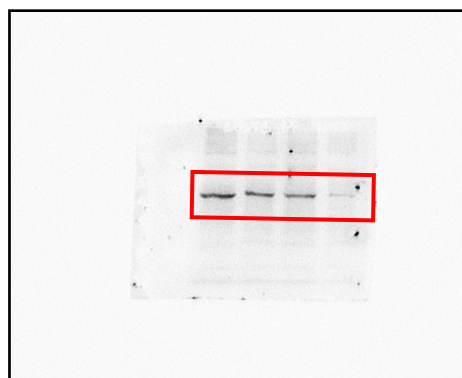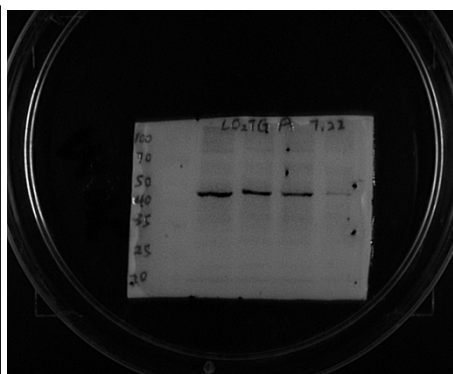

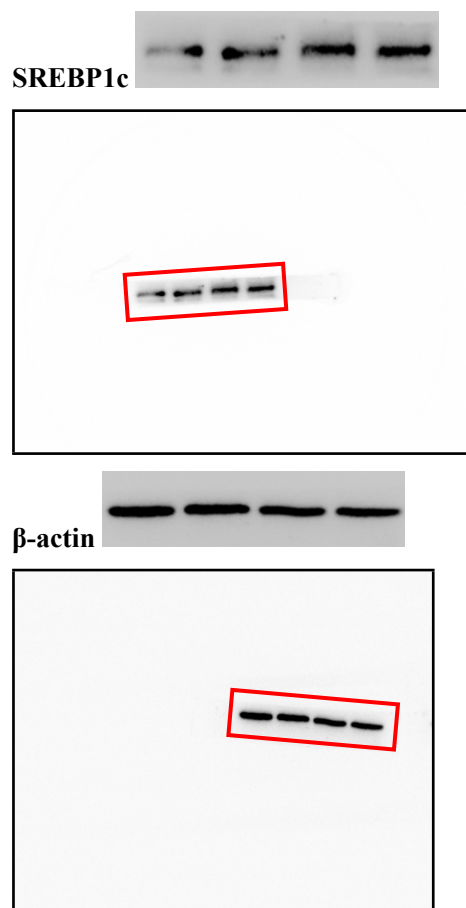

## Supplementary Fig. 9C

|                   |   |   |   |   |
|-------------------|---|---|---|---|
| Control shRNA     | + | − | + | − |
| <i>RELA</i> shRNA | − | + | − | + |
| BSA               | + | + | + | + |
| 250/125 μM SO/SP  | − | − | + | + |

LO2 cells

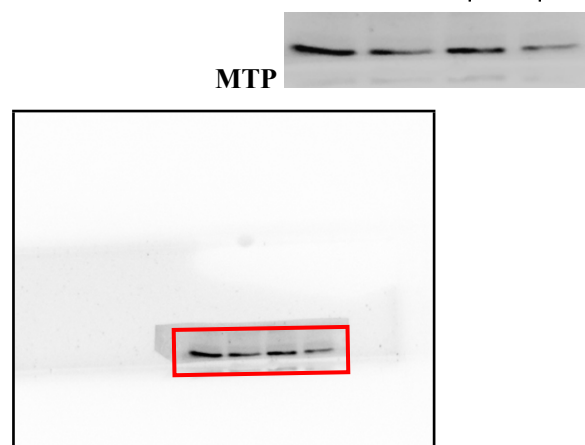

**MCAD**

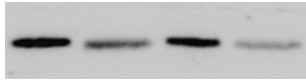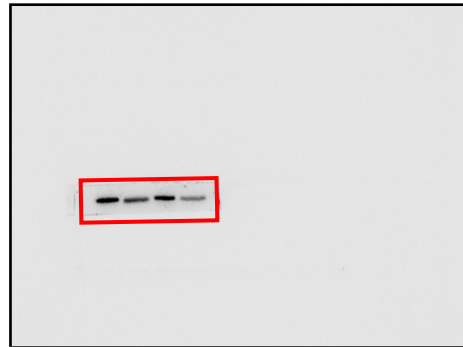

**SREBP1c**

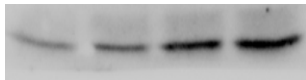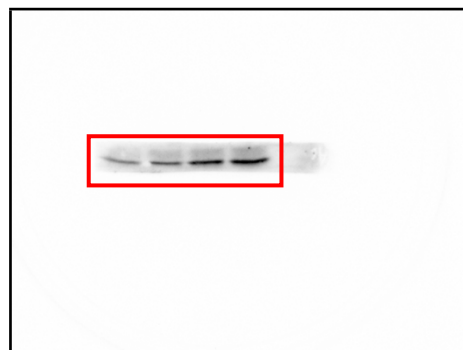

**$\beta$ -actin**

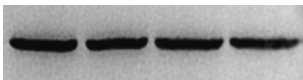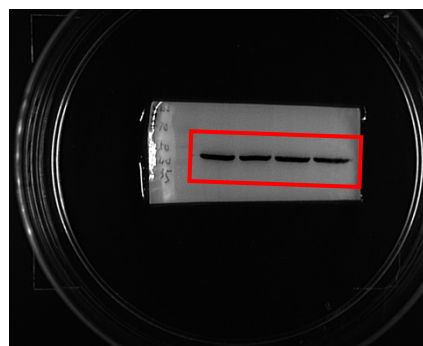

Supplementary Fig. 9D

|                       |   |   |   |   |           |
|-----------------------|---|---|---|---|-----------|
| Empty vector          | + | + | - | - | LO2 cells |
| <i>RELA</i> -pcDNA    | - | - | + | + |           |
| 250/125 $\mu$ M SO/SP | + | + | + | + |           |

MTP

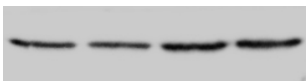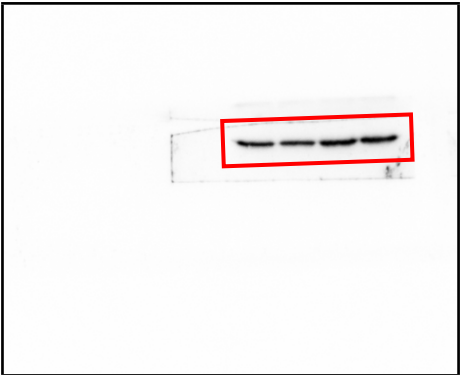

MCAD

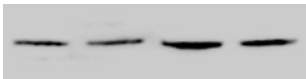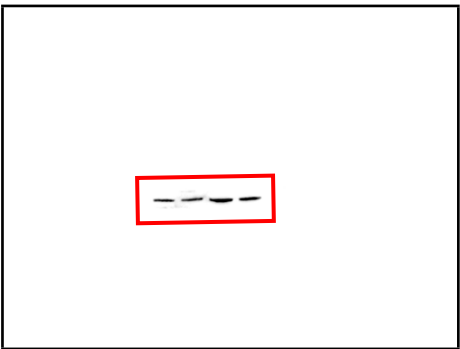

SREBP1c

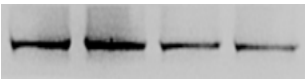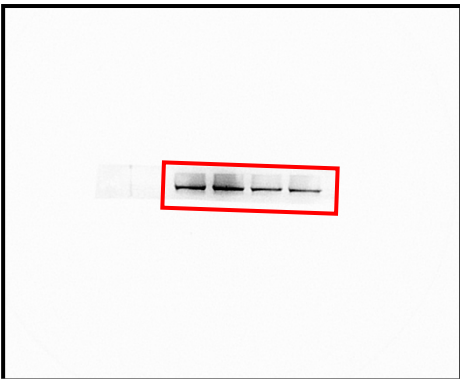

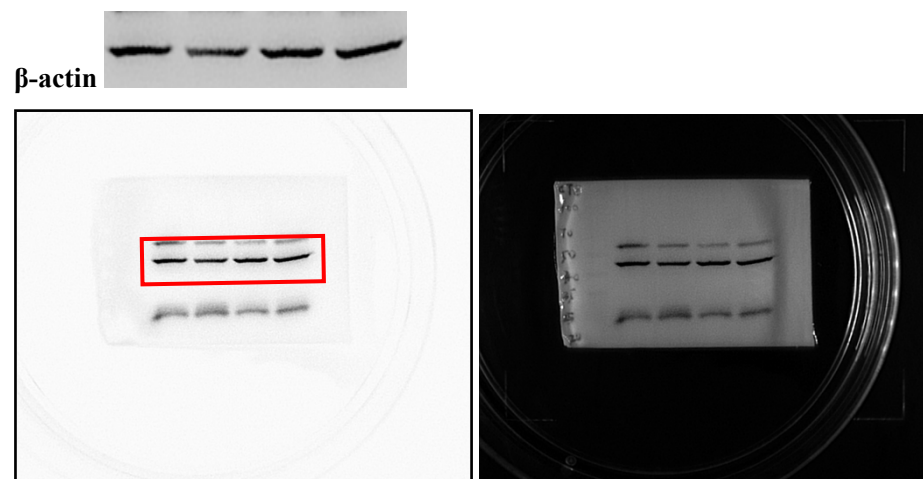

## Supplementary Fig. 9I

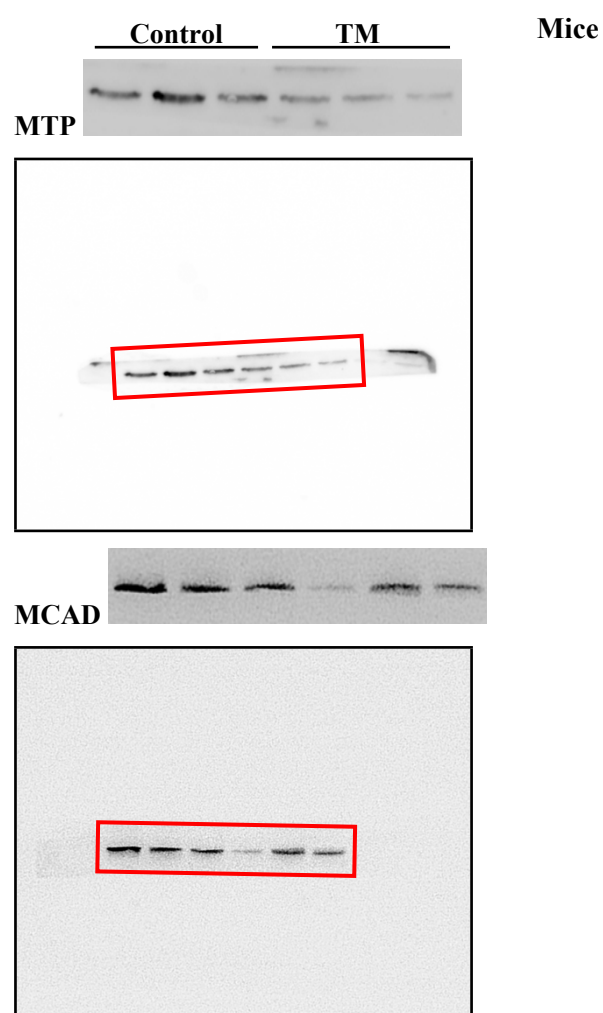

SREBP1c

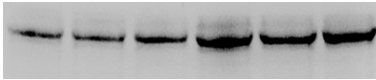
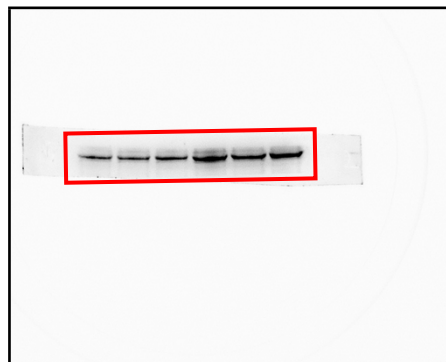

$\beta$ -actin


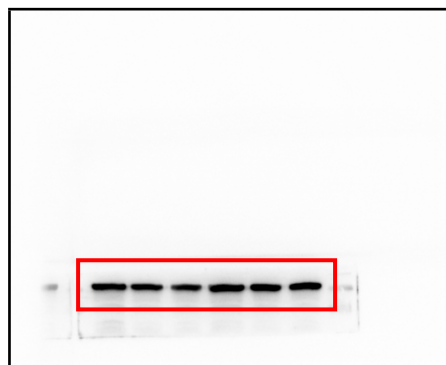

## Supplementary Fig. 9J

|                    |   |   |   |   |
|--------------------|---|---|---|---|
| Control shRNA      | + | - | + | - |
| <i>Hnfla</i> shRNA | - | + | - | + |
| HFD                | - | - | + | + |

Mice

MTP

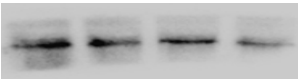
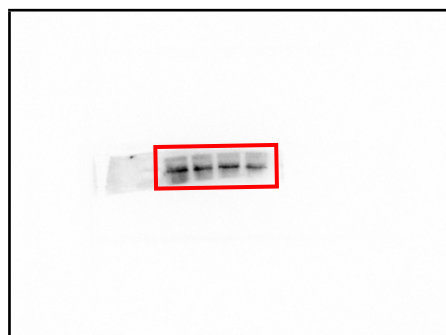

MCAD

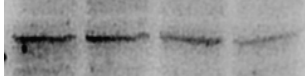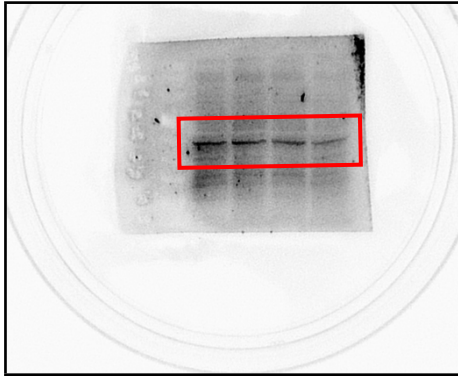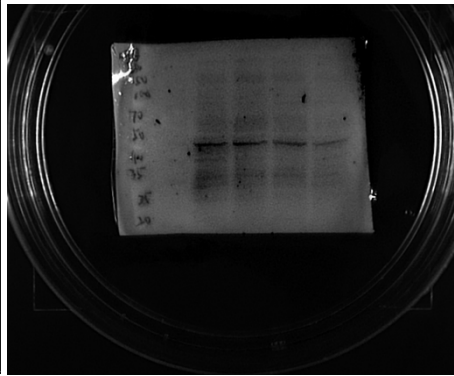

SREBP1c

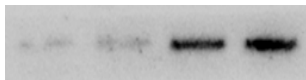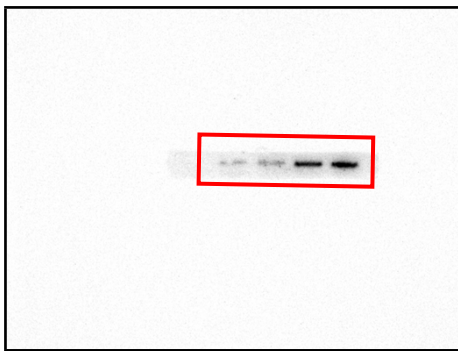

$\beta$ -actin

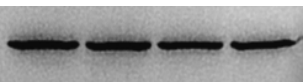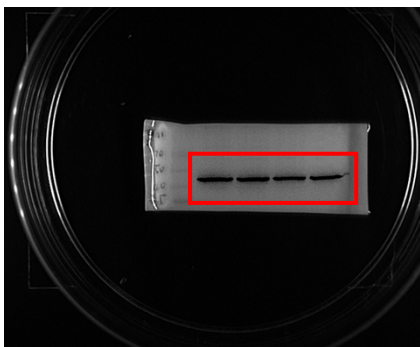

**Fig. 9D**

|                   |   |   |   |   |
|-------------------|---|---|---|---|
| <b>Fatostatin</b> | — | — | + | + |
| <b>SO/SP</b>      | + | + | + | + |

**HepG2 cells**

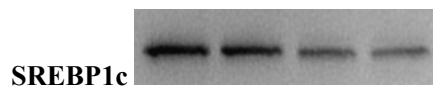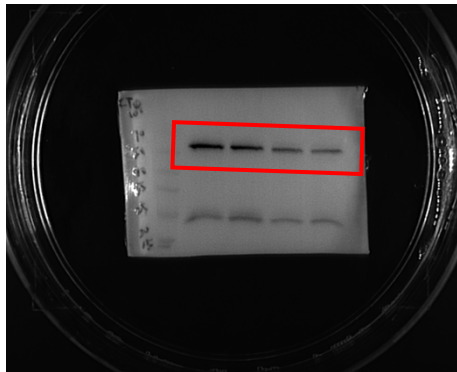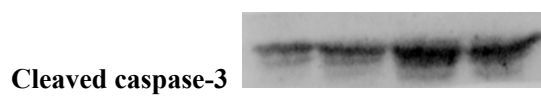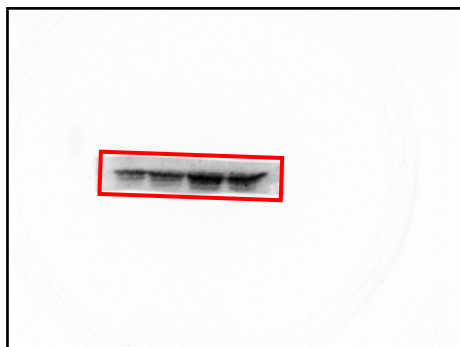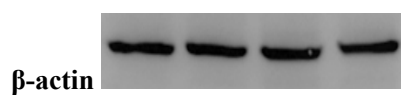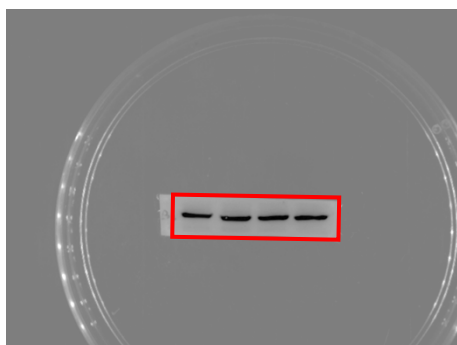

**p-MLKL**

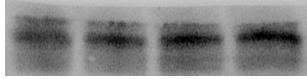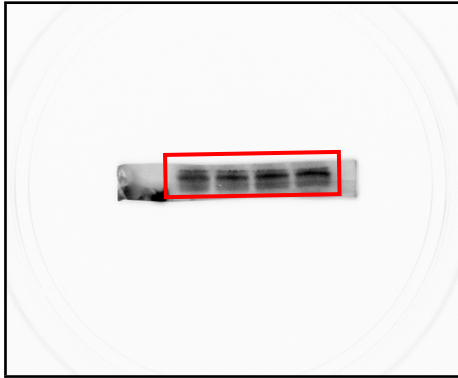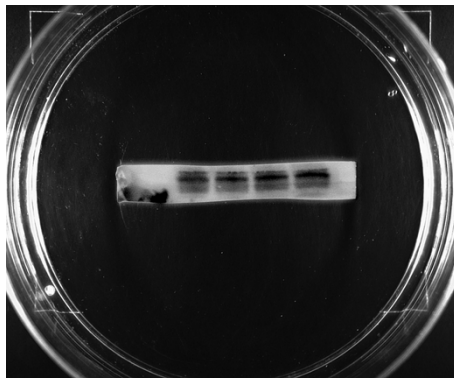

**MLKL**

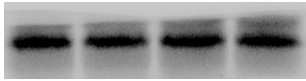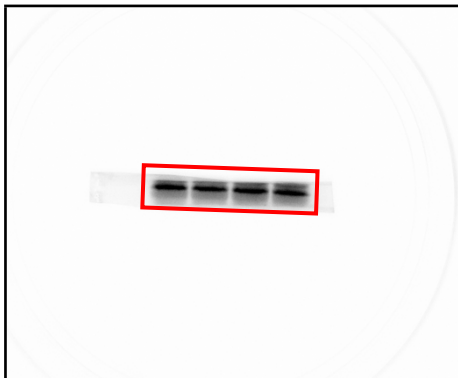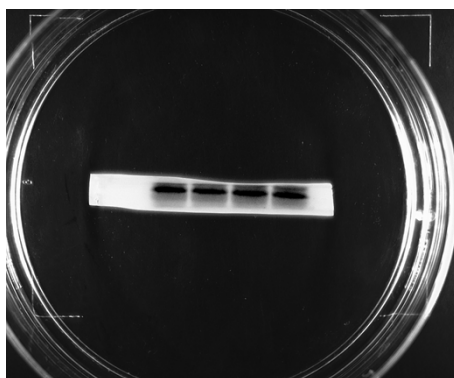

# Supplementary Fig. 11H

|                   |   |   |   |   |           |
|-------------------|---|---|---|---|-----------|
| Control shRNA     | + | − | + | − | LO2 cells |
| <i>RELA</i> shRNA | − | + | − | + |           |
| BSA               | + | + | − | − |           |
| SO/SP             | − | − | + | + |           |

GPX4

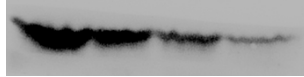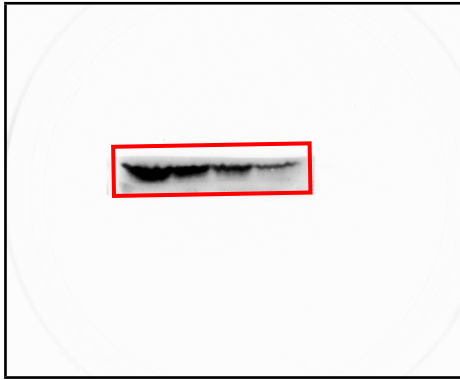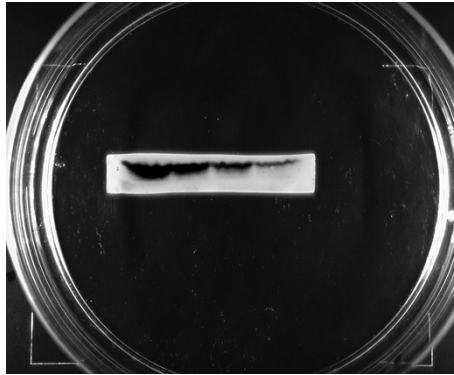

β-actin

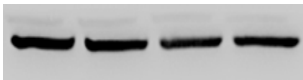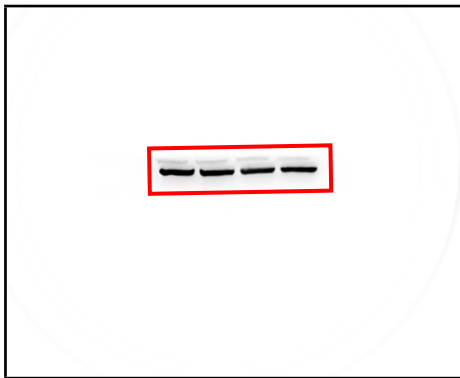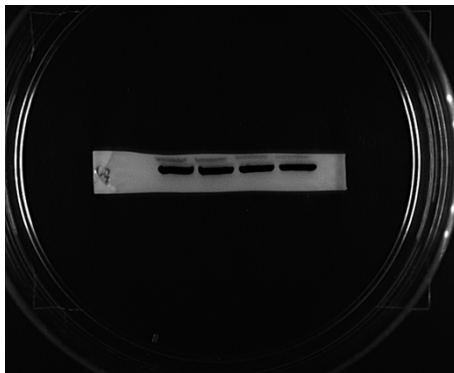

# Supplementary Fig. 11I

|                   |   |   |   |   |
|-------------------|---|---|---|---|
| Control shRNA     | + | - | + | - |
| <i>RELA</i> shRNA | - | + | - | + |
| BSA               | + | + | - | - |
| SO/SP             | - | - | + | + |

LO2 cells

ATF4

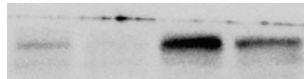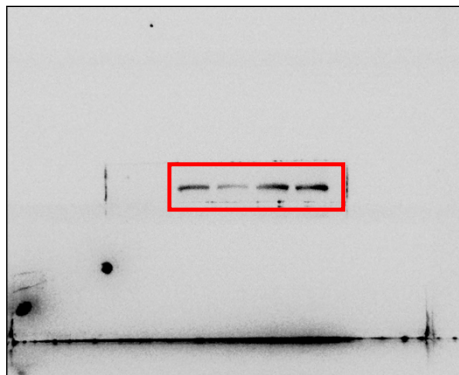

GRP78

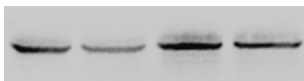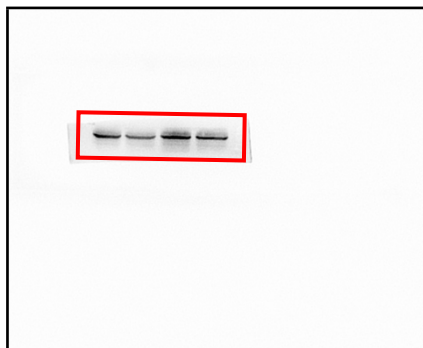

HRD1

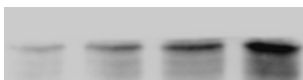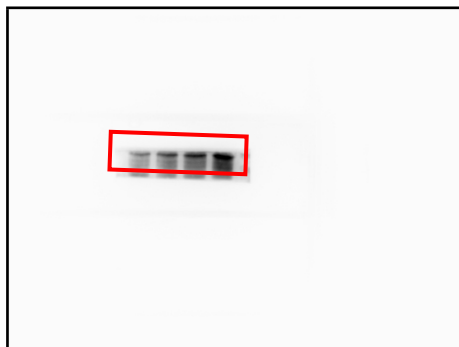

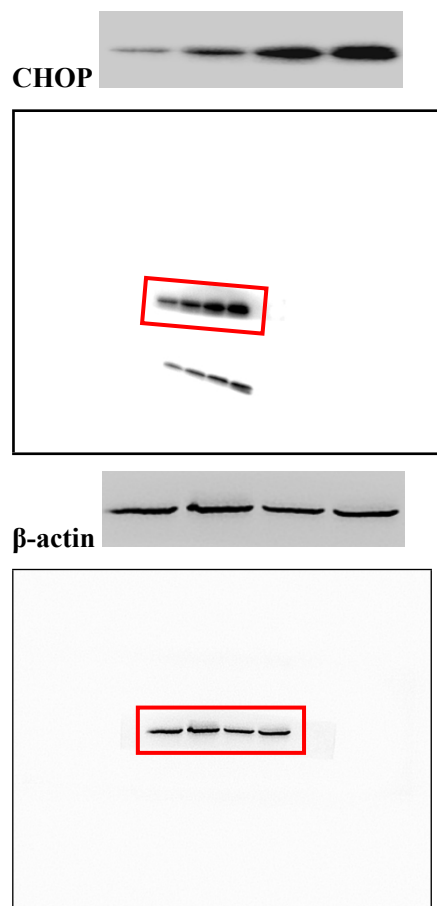

## Supplementary Fig. 11J

|                    |                                                                                     |   |   |   |           |
|--------------------|-------------------------------------------------------------------------------------|---|---|---|-----------|
|                    | +                                                                                   | + | - | - |           |
| Empty vector       | -                                                                                   | - | + | + | LO2 cells |
| <i>RELA</i> -pcDNA | +                                                                                   | + | + | + |           |
| SO/SP              |                                                                                     |   |   |   |           |
| ATF4               | 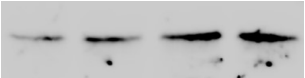 |   |   |   |           |

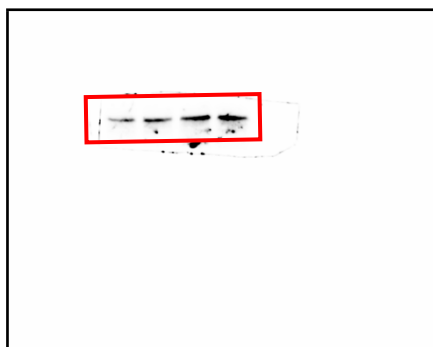

**GRP78**

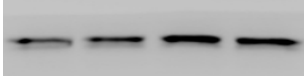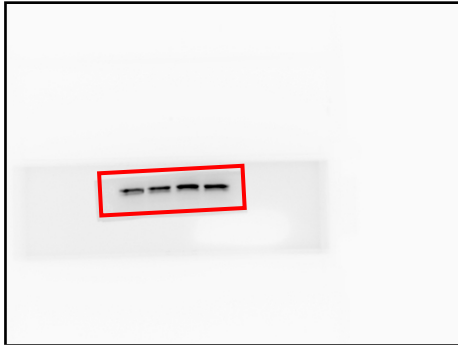

**HRD1**

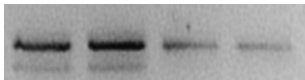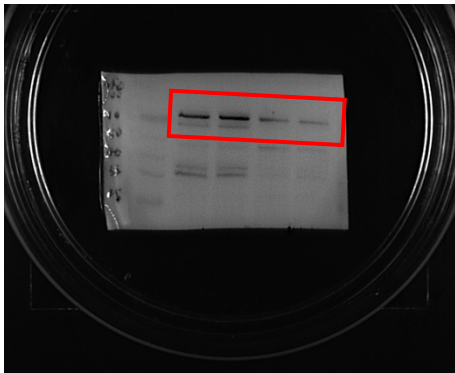

**CHOP**

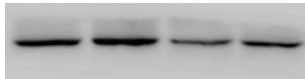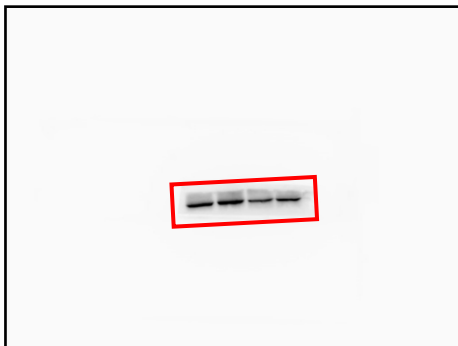

$\beta$ -actin

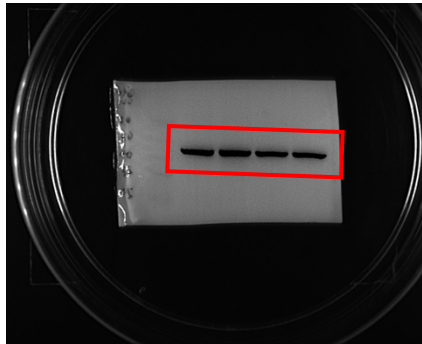

## Supplementary Fig. 11K

|                   |   |   |   |   |
|-------------------|---|---|---|---|
| Vehicle           | + | + | - | - |
| <i>HNFI1A</i> -KO | - | - | + | + |
| SO/SP             | + | + | + | + |

HepG2 cells

ATF4

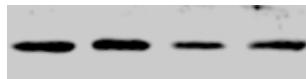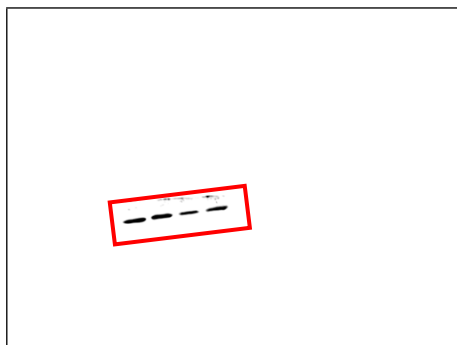

GRP78

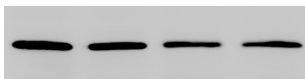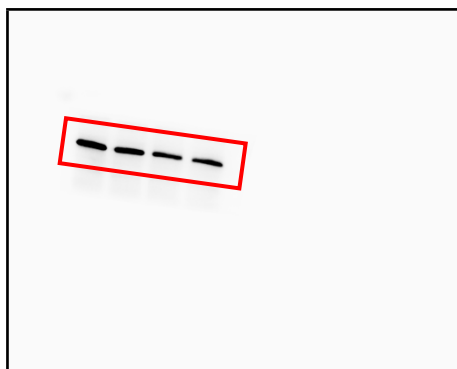

**HRD1**

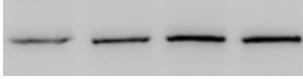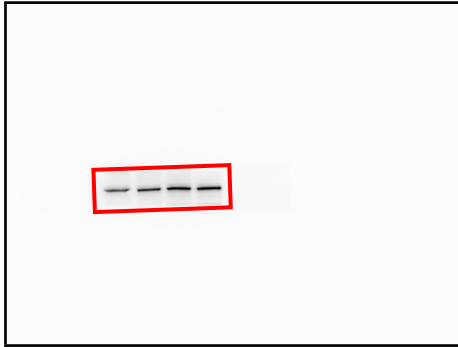

**CHOP**

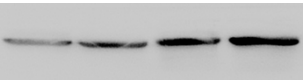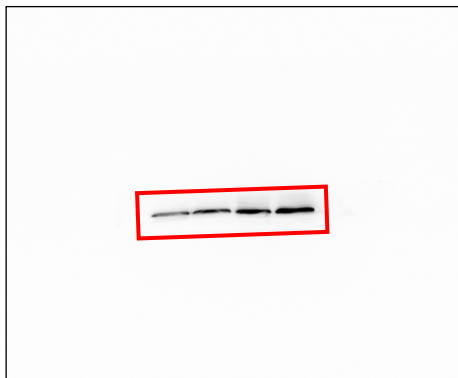

**$\beta$ -actin**

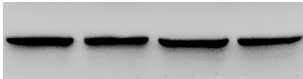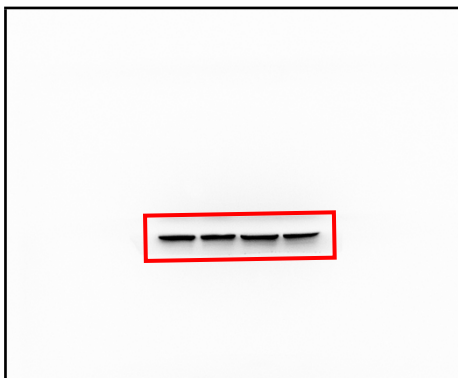

Supplementary Fig. 11L

|                    |                                                                                   |   |   |   |      |
|--------------------|-----------------------------------------------------------------------------------|---|---|---|------|
| Control shRNA      | +                                                                                 | - | + | - | Mice |
| <i>Hnf1a</i> shRNA | -                                                                                 | + | - | + |      |
| HFD                | -                                                                                 | - | + | + |      |
| ATF4               | 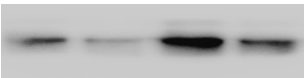 |   |   |   |      |

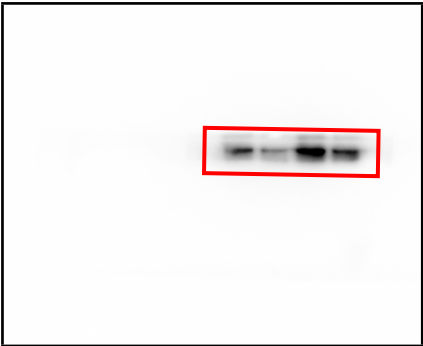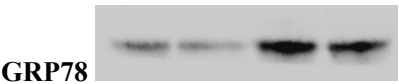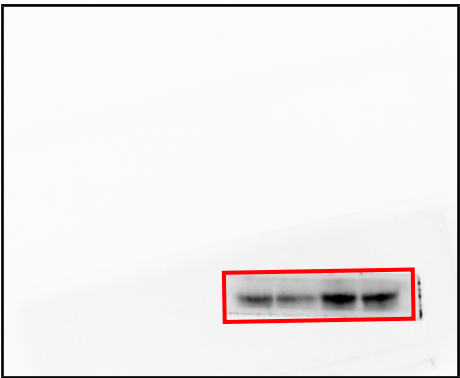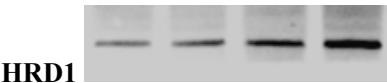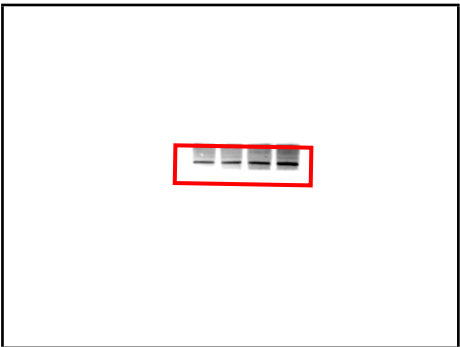

**CHOP**

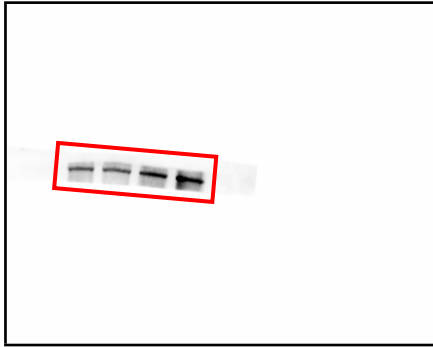

**$\beta$ -actin**

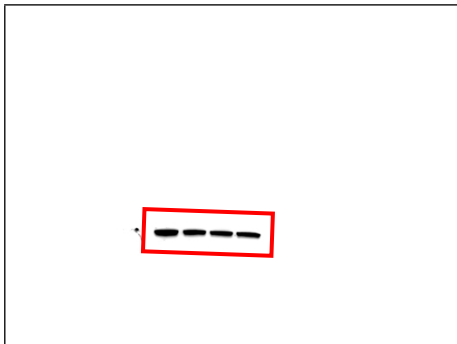

Supplement: MOESM1 [file 41420_2025_2312_MOESM1_ESM.pdf]
